# Supplementary material for: In situ functional dissection of RNA cis-regulatory elements by multiplex CRISPR-Cas9 genome engineering
Source: PubMed Central journal article supplement (PMC5727397; doi:10.1038/s41467-017-00686-2), 2017-12-13
Supplement: 41467_2017_686_MOESM10_ESM.pdf [file 41467_2017_686_MOESM10_ESM.pdf]

## Description of Supplementary Files

File Name: Supplementary Information

Description: Supplementary Figures and Supplementary Notes

File Name: Supplementary Data 1

Description: **GenERA CRISPR/Cas9 sgRNA libraries corresponding to data in Fig. 1-5.** Detailed representation all sgRNA spacer sequences together with corresponding protospacer genomic coordinates, forward/reverse oligonucleotides used for cloning in pAc-Cas9-sgRNA vector, and PAM identity/position.

File Name: Supplementary Data 2

Description: **NGS library primers and amplification conditions used for generation of GenERA amplicons.** Targeted PCR conditions including annealing temperature, minimal non-saturating cycle number and amplicon-specific primer sequences are displayed for each amplicon in the study

File Name: Supplementary Data 3

Description: **Top expressed S2 miRNAs.** Seed sequence identity of most abundant S2 miRNA families is shown together with their ranked expression levels as reported by Ruby et al.

File Name: Supplementary Data 4

Description: **Assembled miR-184 target network.** TargetScanFly 6.2 prediction of conserved 8mer and 7mer-m8 sites and miRanda prediction of conserved 8mer and 7mer-m8 sites with good miRSVR scores were included. \* = putative lincRNA. 484 MRE was excluded from further analysis due to genome misannotation. miRNA-MRE base pairing interaction are shown for miR-184 and most abundant S2 miRNAs.

File Name: Supplementary Data 5

Description: **Expression levels of putative miR-184 targets in S2R+ cells.** FPKM data from two previously published studies (Berkely Drosophila Genome Project (SRR070279) <http://sra.dnanexus.com/runs/SRR070279/experiments>; Berkely Drosophila Genome Project (SRR124149) <http://sra.dnanexus.com/runs/SRR124149/studies>) and an independent profiling performed in this study were used to compile an average FPKM value for each miR-184 target gene (genes with FPKM < 0.015 were not included in the analysis).

File Name: Supplementary Data 6

Description: **Putative RNA regulatory elements (RRE) and their occurrence within selected miR-184 targets.** The count, sequence and position of each RRE encoded within a 200 bp window centred on the miR-184 MRE seed sequence is shown.

File Name: Supplementary Data 7

Description: **GenERA CRISPR/Cas9 sgRNA libraries used for miR-184 MRE network analysis.** Detailed representation all sgRNA spacer sequences together with corresponding protospacer genomic coordinates, forward/reverse oligonucleotides used for cloning in pAc-Cas9-sgRNA vector, and PAM identity/position.

File Name: Supplementary Data 8

Description: Synthetic reference genome sequences underlying the miR-184 MRE network.

File Name: Supplementary Data 9

Description: **MRE-score distribution across miR-184 targets.** Weighted normalized MREscore (MRE-score), corresponding standard deviations, UDP counts and MRE-score group partitions are shown. miR-184 MREs reported by (Kertesz et al.,)<sup>31</sup> and (Hong et al.,)<sup>32</sup> were used for validation purposes.

File Name: Peer Review File



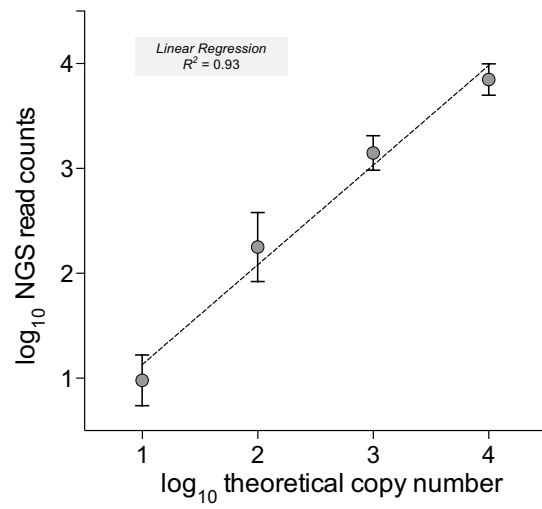

**Supplementary Figure 2. Reliability of deep sequencing datasets.** Estimation of NGS copy number resolution and dynamic range. Each dot represents average barcoded RP49 read counts following serial dilutions in gDNA and cDNA libraries. For each dilution, 3 barcoded RP49 triplicates were generated and sequenced. (Error bars = SEM).

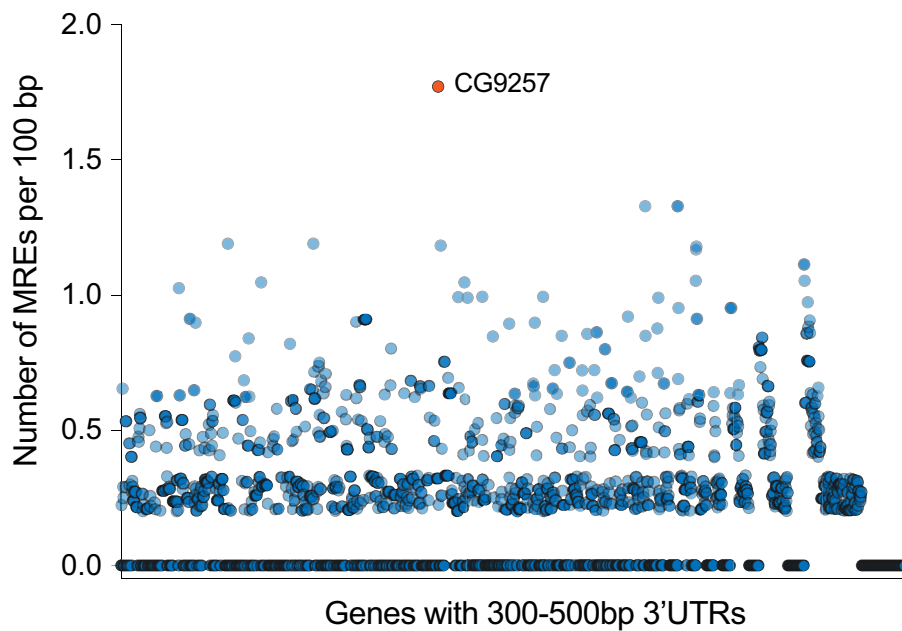

**Supplementary Figure 3. Selection of a candidate 3'UTR for GenERA-based unbiased survey of regulatory activity.** An MRE enrichment score, defined as the number of MREs per 100bp, was calculated for all S2R+ expressed genes containing 3'UTRs between 300 – 500 bp. The MRE predictions included the top 10 most abundantly expressed miRNAs in S2R+ cells (see Supplementary Data 3). The 3'UTR encoded in CG9257 (orange dot) displayed the highest MRE enrichment score among the 2311 genes subjected to this analysis.



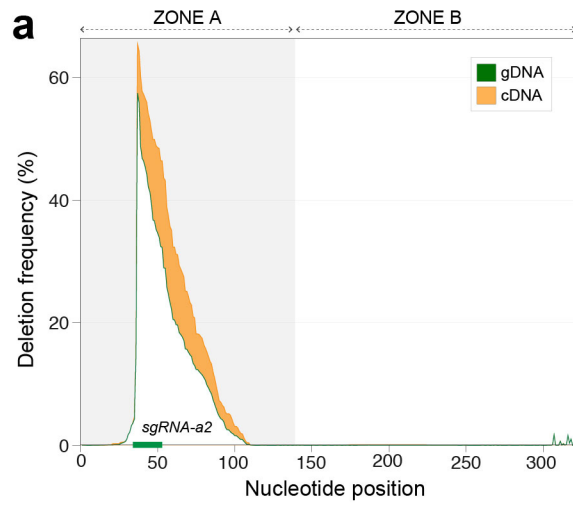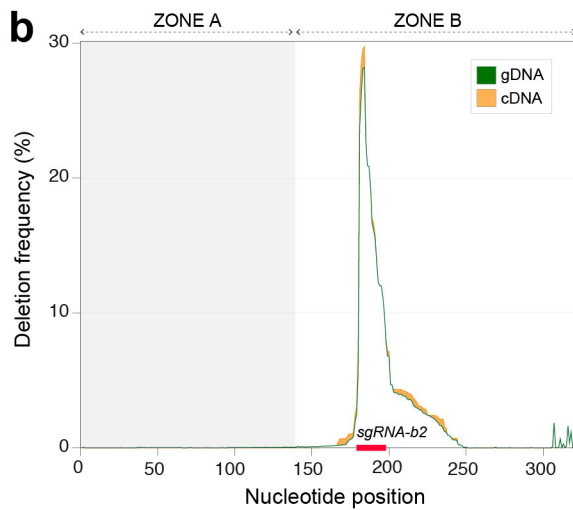

**Supplementary Figure 4. Validation of differential regulatory potential associated with CG9257 3'UTR zone A and zone B . (a, b)** Second set of individual sgRNAs separately targeting zone A (a) and zone B (b) of CG9257 3'UTR (relevant to Fig. 3 d, e). The cDNA and gDNA deletion frequencies across the 3'UTR are shown in orange and green, respectively. The precise positions of the sgRNA protospacers targeting zone A (*sgRNA-a2*, green) and zone B (*sgRNA-b2*, red) are displayed on the x axis.

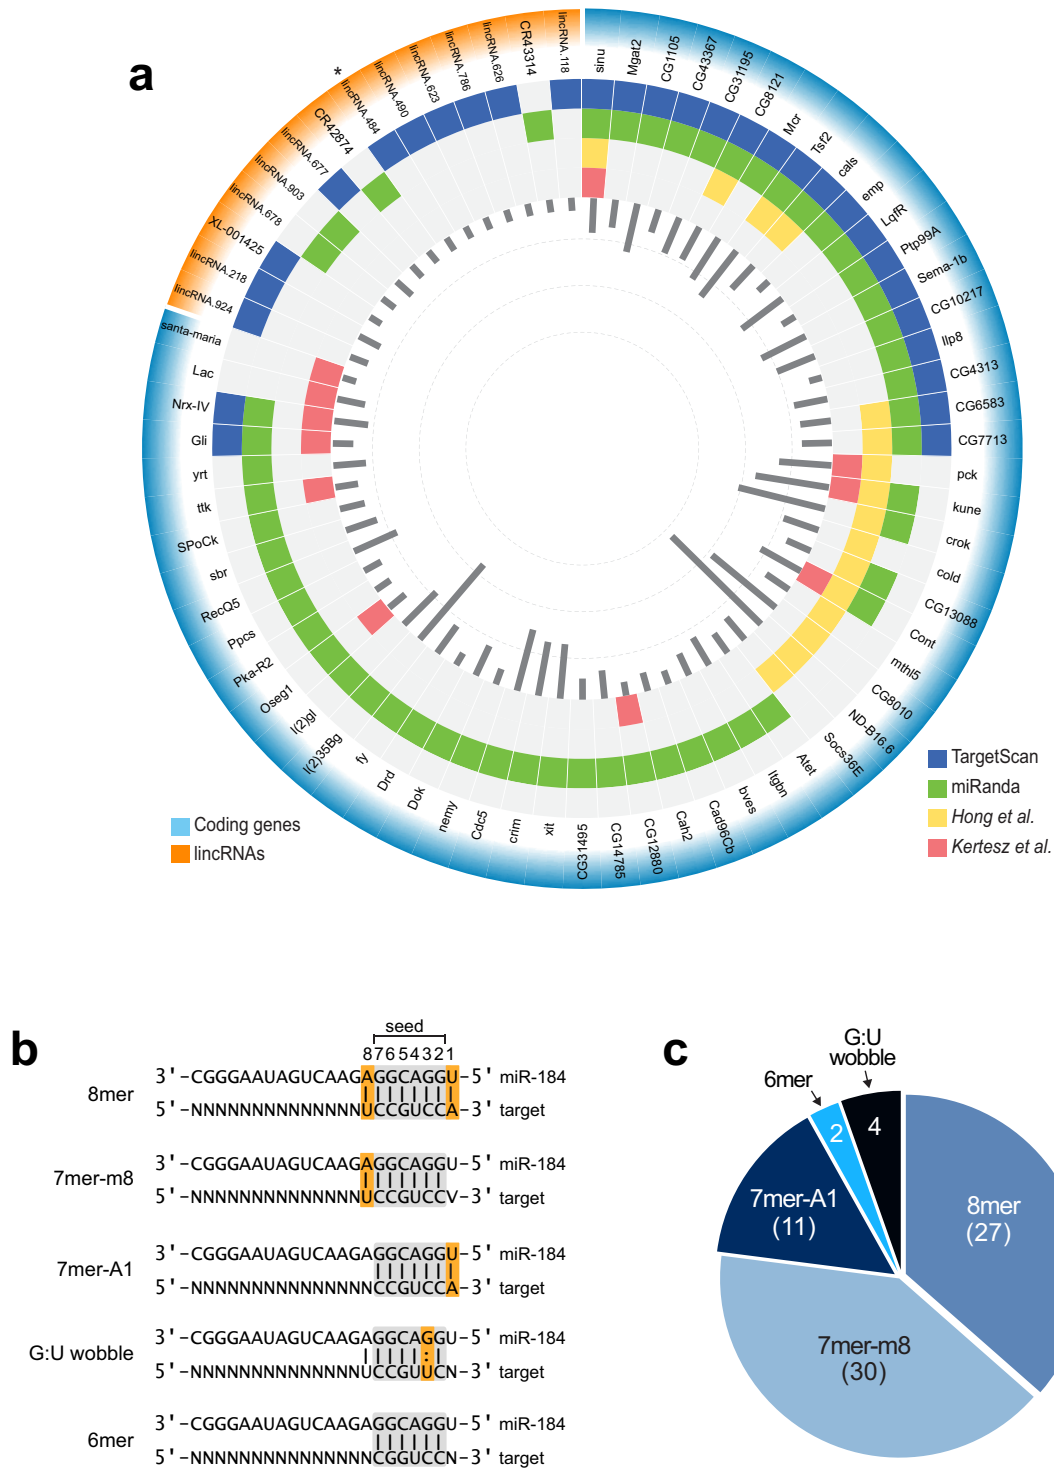

**Supplementary Figure 5. Predicted miR-184 target network.** (a) Graphic representation of the putative canonical miR-184 MRE network outlining the identity of coding and non-coding targets, their source of prediction, and relative expression levels (histogram) in S2R+ cells (\* = putative lincRNA.484 MRE was excluded from further analysis due to genome mis-annotation). (b) Classes of representative canonical seed types found in the predicted miR-184 MRE network. Unique base pairing features defining each class are highlighted in yellow. (c) Corresponding incidence of single MREs within the miR-184 network.





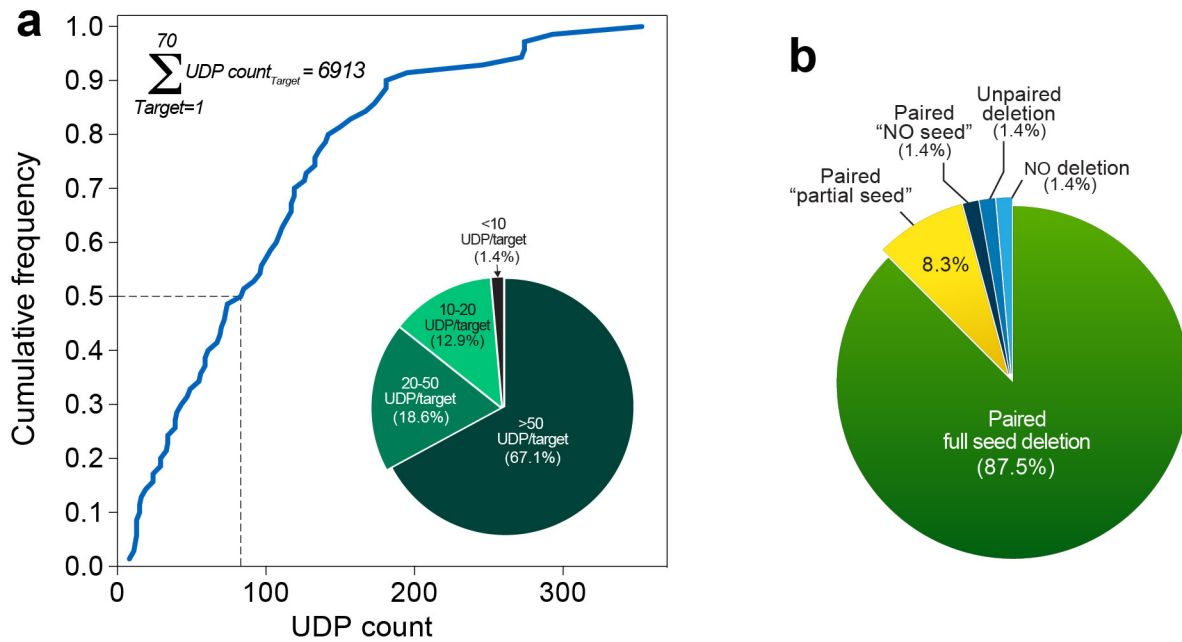

**Supplementary Figure 8. UDP repertoire complexity. (a)** Cumulative frequency of UDP counts across the miR-184 target network. A partition of the data into UDP count intervals is shown in the inset pie chart. **(b)** Classification of deletion patterns relative to seed coverage. Paired full seed deletions = amplicons carrying the same full seed deletion type in both gDNA and cDNA libraries; Paired "partial seed" = amplicons carrying the same partial seed deletion type in both gDNA and cDNA libraries; Paired "NO seed" = amplicons carrying the same deletion type outside the seed in both gDNA and cDNA libraries; Unpaired deletion = deletion types found only in gDNA or cDNA amplicons; NO deletion = ineffective sgRNA.

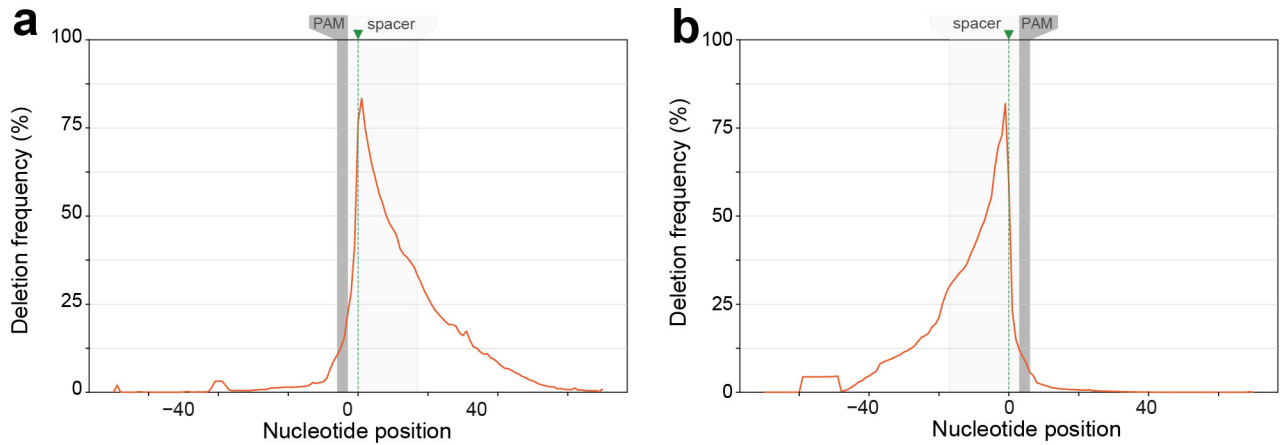

**Supplementary Figure 9. Summary of gDNA deletion frequencies across the sgRNA library used for GenERA-based MRE network analysis. (a, b)** All deletion coordinates were centered by the predicted Cas9 cut site (green line). A biased asymmetrical deletion pattern (away from the PAM) was consistently observed independent of the protospacer being oriented on the sense **(a)** or anti-sense **(b)** strand relative to the direction of transcription. A total of 55 **(a)** and 22 **(b)** genomic loci were considered accounting for 5357 and 1538 unique deletion patterns respectively.

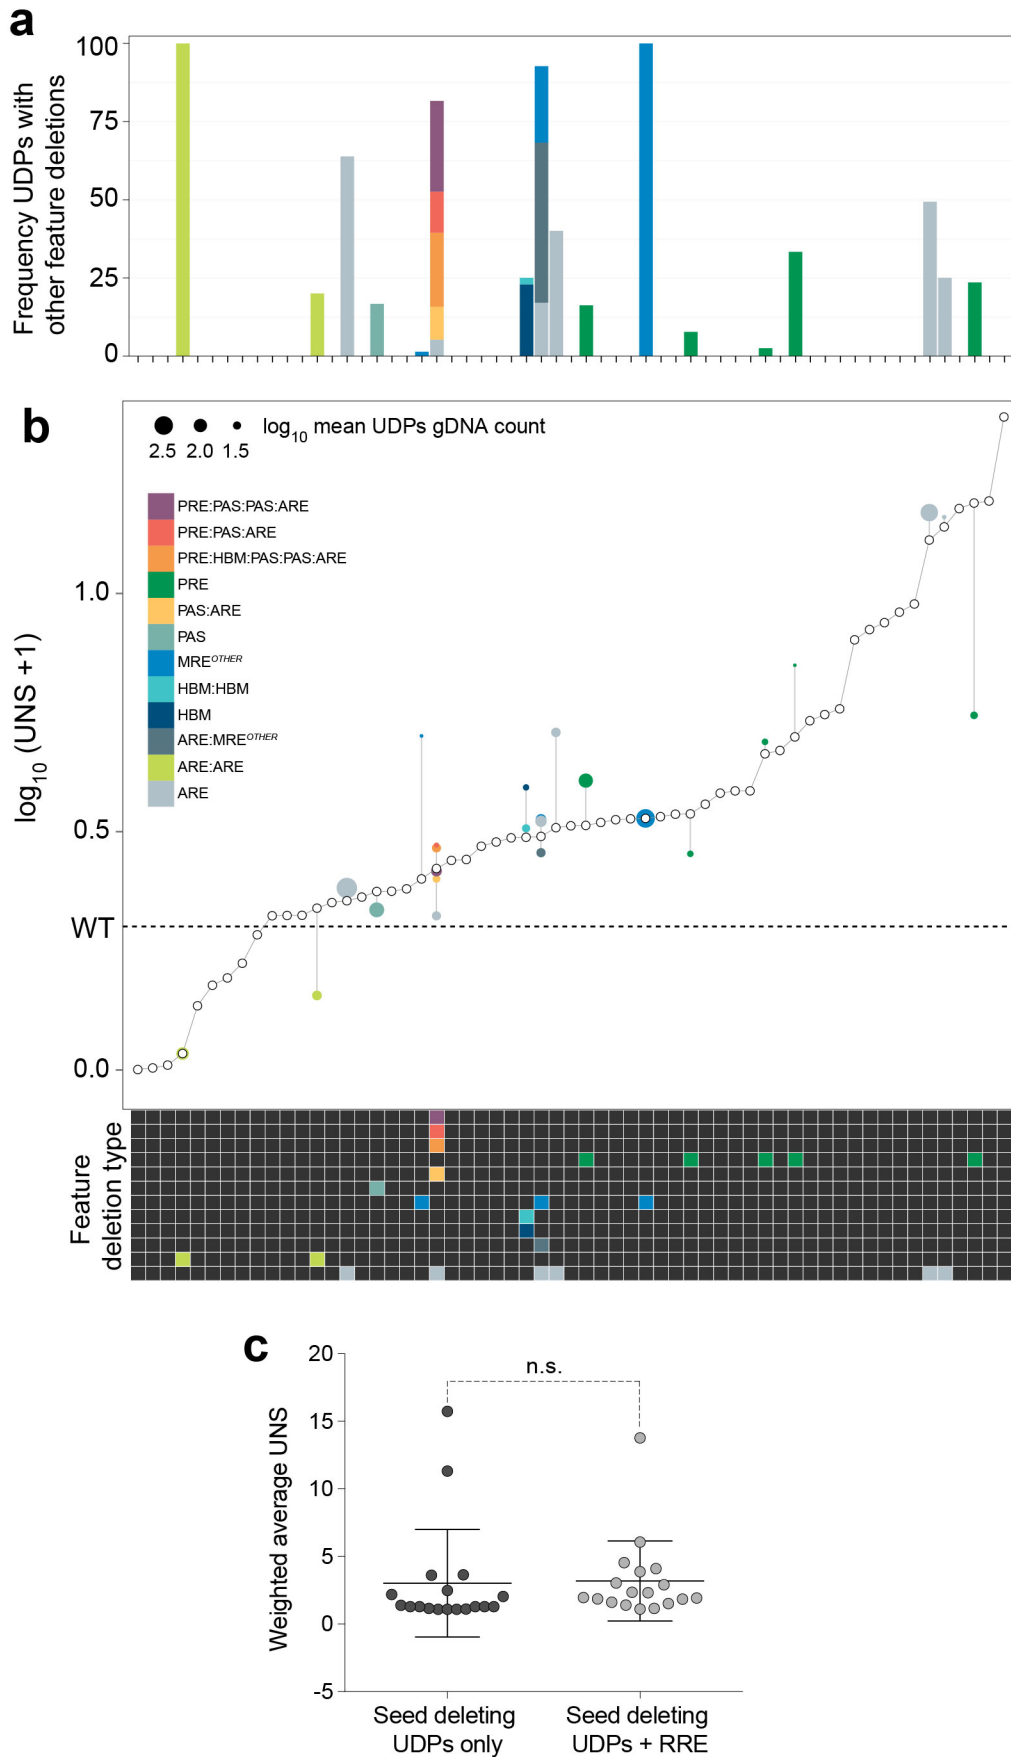

**Supplementary Figure 10. Evaluation of coincidental RNA regulatory elements (RRE) deletions on MRE-score calculation.** (a) Identity and frequency of all coincidental RRE deletion occurrence in UDPs considered for MRE-score calculations. (b) Comparative analysis of weighted average UNS values for seed deleting UDPs sharing RRE alteration events (colored dots) relative to corresponding MRE-score values (white dots). (c) Analysis of UNS values from seed deleting UDPs with or without coincidental RREs (paired *t*-test,  $P = 0.82$ ). ARE = AU-rich elements; PAS = polyA signals; PRE = Pumilio response elements; HBM = HuR binding motifs.



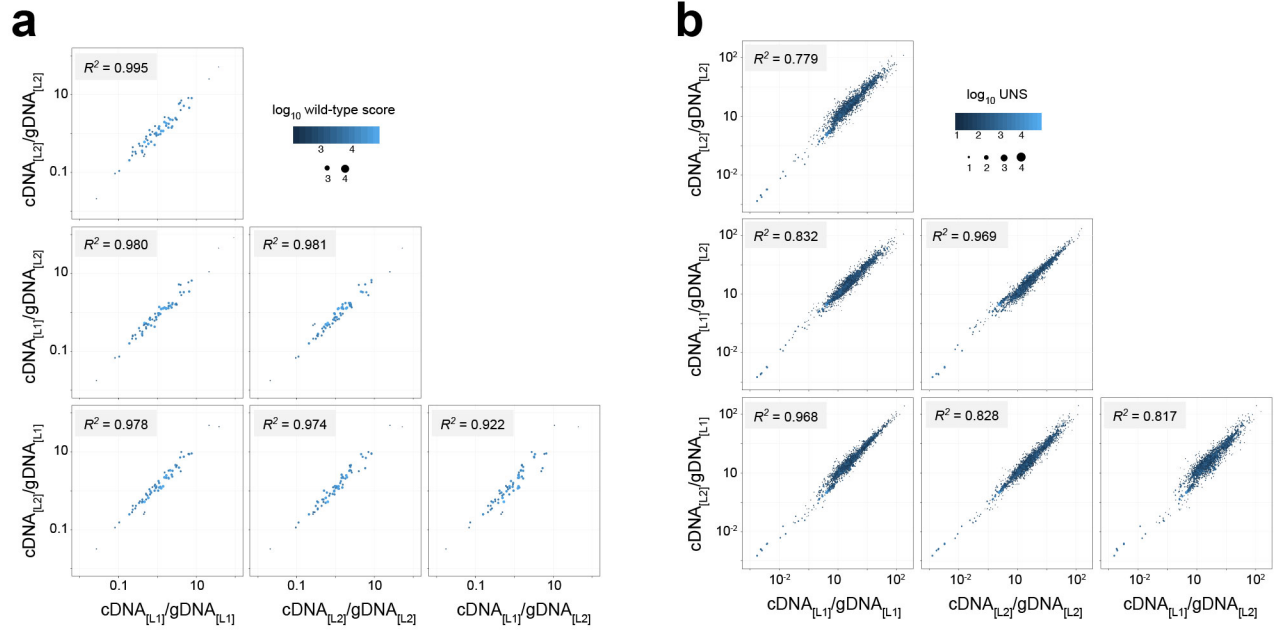

**Supplementary Figure 11. Reliability of MRE-score analysis. (a-b) Pearson's correlation analysis of wild type scores (a) and UNS (b) between all gDNA and cDNA library replicate permutations.**



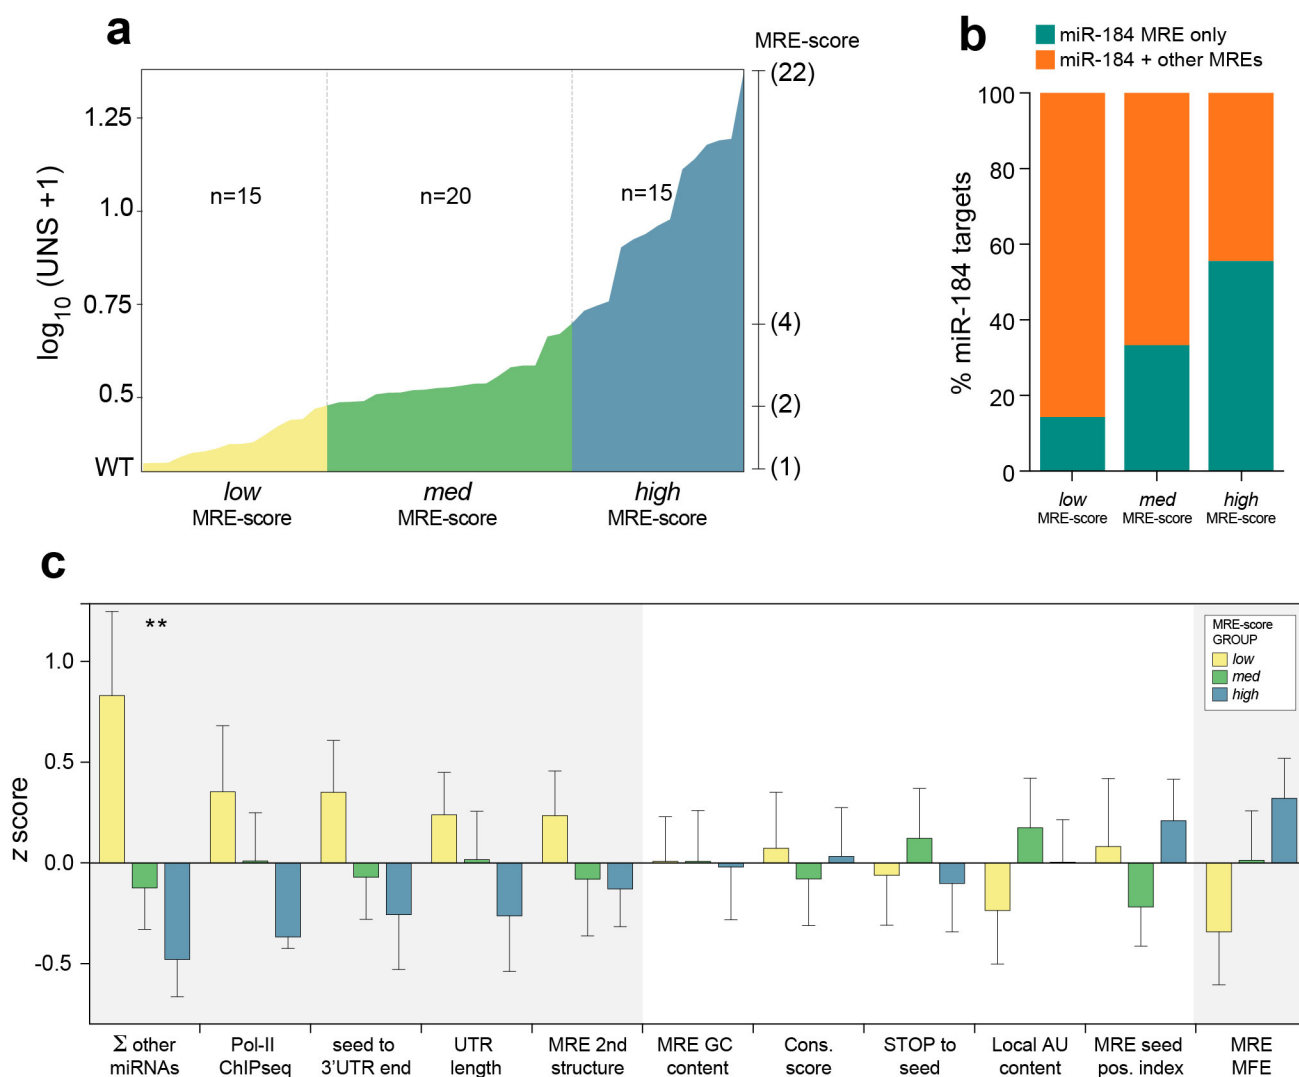

**Supplementary Figure 12. Correlation of MRE-scores with contextual features.** (a) Partition of miR-184 targets into MRE-score groups: *low* ( $1 < \text{MRE-score} < 2$ ), *medium* ( $2 - 4$ ), and *high* ( $4 < \text{MRE-score}$ ). (b) Percentage of miR-184 MREs co-targeted by top 10 endogenous miRNAs across three MRE-score groups. (c) Comparison of average z-score values for 11 contextual features across MRE-score groups. Features with positive or negative trend across the three MRE-score groups are highlighted by gray shaded areas ( $n = 15$  [*low*],  $20$  [*medium*],  $15$  [*high*], Error bar = SEM,  $** P = 0.0065$ , one way ANOVA). Cons. score = conservation score; MRE MFE = MRE minimum free energy.

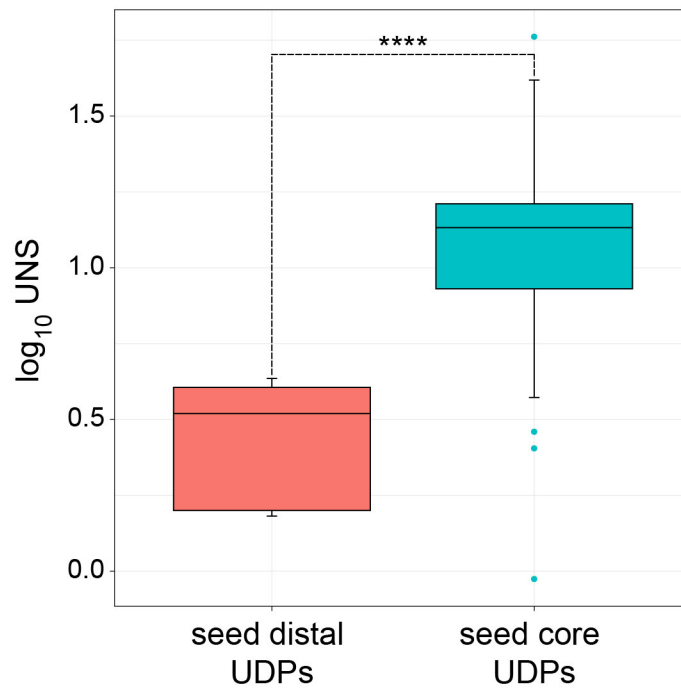

**Supplementary Figure 13. Role of *crok* MRE distal seed nucleotides in miRNA-mediated repression.** UNS of all seed deleting *crok* UDPs were partitioned into those deleting core seed nucleotides (nt. 2-7, teal) and those affecting only extended seed distal positions (nt. 1 or 8, red orange). Core seed deletions (teal) displayed significantly higher UNS values than those only affecting distal seed positions (red orange) (Bonferroni rectified \*\*\*\* $P < 0.0001$ ).

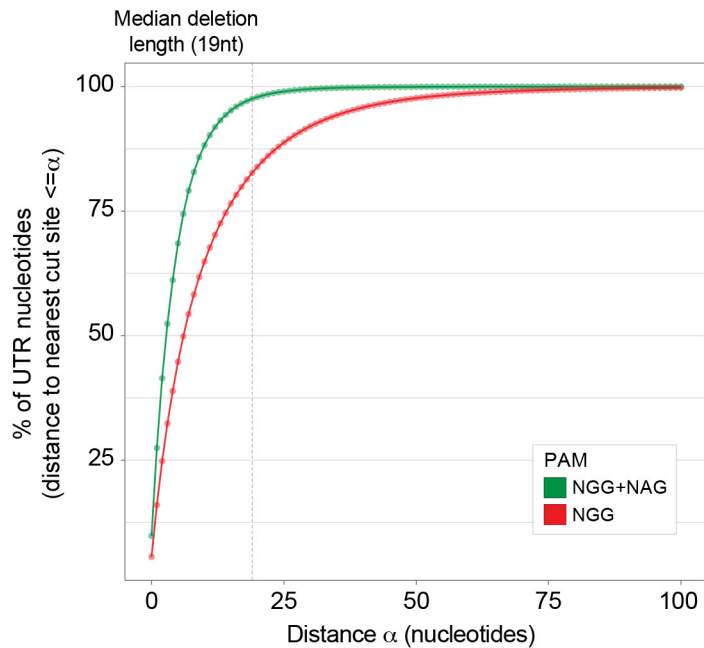

**Supplementary Figure 14. Analysis of Cas9 cut sites frequency across *Drosophila* 3'-UTRs.** Graph displays for a given distance  $\alpha$  (x-axis, in nucleotide) the fraction of nucleotides in the *Drosophila* 3'UTR repertoire at a distance equal or shorter than  $\alpha$  from the corresponding nearest CRISPR-Cas9 cut site (y-axis). CRISPR-Cas9 cut sites considered to derive this graph were either NGG PAMs only (red) or NGG + NAG PAMs together (green). Dashed line = median genomic deletion size in the GenERA screen (19nt).

## Supplementary Note 1: CG9257 3'UTR saturation editing

*GCCTTTATACCACTGCTGTTCTGCCTCTGCAAGCTGTGATCCCCATCCGTTGCTCAC*  
TCAACGCTTTCGCTGCGTTGGTTTTCTGCTTTGTGATTTTGTGATTTTGATAAAAG  
ACTTAATTATATACTTATCGTTTAGTTCGTACGTTACGCACTCCTTAGAGTTCCGGTT  
CCCTTATTCCCAGGATGCAAAGCTCTCTAACGCCCTGTACTTTCCATATTTGATAAG  
CAATTCTTTTGTGTTCTTCTCGTTGACCACTGCCGCCCAGGCTCGTGTACTTAATC  
GTTGAGTCACTTGATTTCAATTCCCGGATCGTTTGACCGCTTGACTAGGACAATGTG  
CGAAAAGGTAGATCGGTTTTTGGAGACAGTTTTTGCTTGGGAACGTGTTGGTTTTGA  
ATGACATTGAATAAAATTAACCTTGTTTGTATTGaacaaaaagcttttgattattt  
tcatgatggCCTGGATTGTGCGACT

**NN**: ORF exon

**NN**: 3'UTR

**NN**: PAM sequences

**NN**: polyA signal

**NN**/**NN**: Fwd / Rev gDNA NGS library primers

**NN**/**NN**: Fwd / Rev cDNA NGS library primers

To maximize the recovery of NHEJ-induced deletion events, the gDNA 5' and 3' PCR primers for targeted NGS library generation were designed outside but immediately flanking the UTR sequence. For cDNA amplification, the position of the 5' primer overlapped that in gDNA while the 3' primer was placed immediately adjacent to the predicted polyA signal at the end of the transcript (Fig. 2b, Supplementary Data 2).

## Supplementary Note 2: CG9257 multiplex MRE editing

**GGGCCTTTATACCACTGCTGTTCTGCCTCTGCAAGCTGTGAT**CCCCATCCGTTGCTC  
ACTCAACGCTTTCGCCTGCGTTGGTTT**CCT**GCTTTGTGATTTTGTGATTTTGATAAA  
AGAC**CTT**AATTATATA**ACTT**ATCGTTTAGTTCGTACGTTACGCACTCCTTAGAGTTCGG  
TTCCCTTATTCCCAGGATGCAAAGCTCTCTAACGCCCTGTACTTTCCATATTTGATA  
AGCAATT**CTT**TTGTGTTCTTCTCGTTGAC**CCACT**GCCGT**CCCAGG**CTCGTGTACTTAA  
TCGTTGAGTCACTTGATTTCAATTCCCGGATCGTTTGACCGCTTGACTAGGACAATG  
**TGCGCAAAGGTTAGATCGG**TTTTTGTGACAGTTTTTGTCTGGGAACTGTTGGTTTT  
GAATGACATTGAATAAAATTAACCTTGTTTGTTATTG

**NN**: ORF exon

NN: 3'UTR

**NN**: PAM sequences

NN: polyA signal

NN: predicted MRE seed sequences

NN: Fwd gDNA/cDNA NGS library primers

**NN**: Rev gDNA/cDNA NGS library primers

Supplementary Note 3: DNA sequences of all genes comprising the miR-184 target network.

- NN: ORF exon
- NN: 3'UTR
- NN: miR-184 MRE
- NN: Cas9 PAM
- NN: sgRNA
- T: G:U wobble

miR-184 MREs in coding RNAs

1. sinu

TATTACCAGTGC GGCCACACTGCAGTCCACACCCCAAACAGCAAACCAAACAAACATTTCCCCAGGAAACCAGCGAAATTC  
CAATAGAATTTCCCACTCAAAGGATGCAAAAACCATCCCACTTCGCACGCGAGGATTCCCAGGAGCACCTGCCACCAGC  
CACACGCAAAACAGTACACAGTGAACATGAAGAGACGCACACTATCCGGAAGTTGTGGCGTTGGCGTCTTCGTGTTGCG  
CTTTGCGTTCATCGTGATTGCGTTTGCAACGCCAGTTGGTTGGTCACTGATTACCGCATCACGGGCGCCAAGCTGGATC  
GCCTGGGATTGTGGGTGCAGTGCCTCCGGTCGCTGCCGGACGTGAACGACGATAGCCAGCGGAGATTCTTCGTGGGCTGC  
CGTTGGGTGTATGACCCATTTACCACGGGTTACGATGAGATCCGTGGATTCCGTGCTGCCCGCCTTCATGATAGCCACTCA  
GTTCTTCTACACTTTGGCCTTCATCGGGATGTTGGTATCTGCCATCGGAGTACTGGTCTTCATCCTGTGTGCTGGTCCGG  
ATCAAAGCACCTCATTACGCTCATTAAATCGTTGGGATATGTGCTTCTCGGTGCTGGAGTAAGTGCAGCCATTGCAGTG  
ATTGTATTCGCTGGATTGGCAACCGGAATGGCTGGATGCCGGAGCATGCGAACAATTGGTTGGCTGGTCTTTATCCT  
GGCGTGTGTTGGTACTGTGTTAACCCTGGTGGCGTCTACTTTGTTTCTCAGTGAAGCCACGTGCAGCACAAGAAGAGAA  
TTCAGTTCAAGGAATCTCAGACGCGATTTGAGCTGGTGC GCGGATAGTCGATGCCGTGGCAGCTGGCACACTTGCACCAA  
GGAAAACACAAGCCAACCAAGAGGAAAACAAAACAAAACAT **TCCGTCCCTCAAAGAATTCTCAC**CCCTAAACATTACAG  
TCGAACCTCTCTAAGGCGAAATATTTCTAACTAACAGTTTCTGGTAGTGCACGTTTTTAAAGTTGGTTTTATGTTTCGTTTTA  
TATTTTATTCAATGGTTTTCCCTGTGCATAGGTTAAAGTATTCATGTCGGTAACATTCGTTTTATATTACCTTAAATCGTT  
TAAATAACTCCCCAAGTGGCGGAGATTTGAAAAATTTTAAACGAACCAAAGTTATTTTTGGATAAAAAATAATTTTTCGCCAT  
ATATTCATCGCTTCTCTTAACATACCTAAAGAAATTAATTTTAGTTTACAGAGAAGTTTCGACTGTACTCGTAGTTTTTAAAT  
TTAAAAAGTTTATGCAATTGACGGCCGCACCGATTACAAAGCTTTTTCAGTTTTTGGTACTTATAATCATCCATCCAATCGA  
CCAGATCAGTTCCAAGAGAAGACTGAATGTTTTTCCGAATGAAAACCAAGCAACAGCTAACATCAAACGAAGACG  
CTCAACTAGATGACTCATGTTTATGTAGAGTATTTTACAGTATTTGCATAATCAATTTTCGCTCAATTAACGCCAGACAC  
AAGAGCATACCCCTCCGCAATGTACGTTTATTTTTTTCTTAGCAAAAGTCCGAGGCTAGTCGGAAGTATGCTGATAA  
TATTACACTCGTGCCTTAATTAGATAGAATATTATGTTGTTAGTTTCGTTAGTGCCTGAAAACAAATTTATTGTTATAAACAT  
ACCTGAACGACTGACCTGCGACTAACCATAGAGATCATGTAATTGATAAACTTCAGCTAAGCTAGTGCCTTAATTAAGT  
GACCCAGAGAAAGGTAAGCGAAACTCCGCCATTAGTTTTTAAAGAACAAAACATTTCCCTTTTGAAGTCAATATTCCGCAC  
AAGTTACCTTCTTTTAAAGGTAACAATTAGGT **CTGTATTAATCATCCGTCCCTTTG**CACGATTTTGTAAACATTTTCTAAAC  
CGAGAATTTAGCAATGTATTAAAGCAATACATACCTCTTTTACCCTCCATATACAATAATATGTGTAACATTTTTTATGT  
ACAAACGACTTTTGTAGCTAAAGCGAAGAATAATAAAGTTTTTATTGTATACAACAGCTGAATGCAT

2. Mgat2

CAGATACTCAGTTACTCAGCTACTCAGATACTCGTTCGCAGCGGACGGCCGAGCTGAGATACTCGATCGCGAGCTTGTG  
TTGCCCCAGCCAGGCGAAAGTGA AACCGAACGCCAGATGAACGCCGAATAAATCAAGCGAAGTAGCAACAAATGCGGG  
AAATGTGAAAATGCGCGCGGCAGTGGGTTGAAGCGAGACGGGTAGAGCTAGAGAGATGCCCGTTTGGCCGCTGTGCGTGT  
GTGTGTGTGCAGCGCGGCCGTAGCAGCTGCTGATGACGAGATGAAGGCGCTCACCCAGTGAAGAGCCAGCAGTTACTCG  
AATCCGAGGAAGCGAGGAGCGACGAGATGTCGAAAATGAGGGGTAATTGTAATTGAATCGAGTTTCCGGCTTAGAAAAGC  
CAGCCTTGCTAAATCCATTAATGTTTGCCATTGAATAGGTGCGATTCTGATCCCACTGCCCAATACCGGAGCGATGGGT  
CGCAAGCGCAACAACCTTCTACATGCGGAGTCTGTTTCTGCTGGCCCTGGGCATTTTCCGGTCTGCTCCAGTACAACAACCTT  
CAATATCGTAAGTAATAGGCGCCAGCAGCTCGCATCACCAGGTAATCTTTACTTCTGTTGCAAGTGGACTCGCGGGACA  
ATGTGCTGGGCGACGCGGTGACCAACGACTCGGACGACGCCATCCTGGCCATGGTGGCCGCCACCCTGCACAAGTATCTG  
ACGCCCCACTCGCGCAATCACAGCGCCTCGGAGCAGGAGCCTCAACGGCGCGGGTAAGCCTTCAGCGAGTTAGCCAAG  
ATAATGAGATAGTTTAACTGGATTGCAATCACCCTCAGCCCTGCTCCTGAATGCCAGTAGTCCGGGCGCAGCTACTGCC  
AGCACCATCAGCTTCGACGTGTACCATCCTCCGAATATCACCGAGATCAAGCGCCAGATCGTCAGGTACAACGACATGCA  
GATGGTGC TCAACGAGGACGCTCTTTGGACCGCTGCAGAACGACTCTGTGATAATCGTGGTCCAGGTGCACACGAGGATCA  
CCTACCTGCGCCACC TGATCGTCAAGCTGGCGCAGGCCCCGGGACATTTTGAAGGTGCTGCTGGTGTCTTCGCACGACTAC  
TACGACGACGACATCAACGACCTGGTGCAGCAGATCGACTTCTGCAAGGTGATGAGATCTTCTACCCGTAATCA  
GACGCATCCTAACGAGTATCCCGGCGTGGATCCCAACGACTGTCCGCGAAACATCAAAAAGGAGCAGTGGTATTGGCCA  
TCGCTATATGTATGGCTATTTCTATAAGTATCCCTCGTTCCAGAGCTCTGATCACC AACTGCAACAATGCGATGTATCCC  
GATCTCTATGGCCACTATCGGGAGGCGAAGTTCACGCAGACGAAGCACCATTGGATCTGGAAGGCCAACCGGGTGTCAA  
CGAATGGAGGTGACCCGCTATCACACAGGACTGGTGTGTTTCTCGAGGAGGACCACTACGTGGCCGAGGACTTCTGT  
ACCTGCTGGCTATGATGCAGCAACGCACCAAGACTTGTGCCCCAGTGAACGTGCTGTCCCTGGGCACCTATCTCAAG  
ACTTCAACTACTACACGTACCACAGCAAGGTGGAGGTGATGCCCTGGGTGAGCAGCAAGCACAACATGGGCTTCGCCCTT  
CAATCGCACCACCTGGTGAACATCCGGAATGCGCCCGCCACTTCTGCACCTACGATGACTACAACCTGGGACTGGTCTT  
TGCAGCACGTTTTCGCAGCAGTGTCTGCGGCGAAAGCTGCACGCCATGATTGTCAAGGGGCCGAGTCTTCCACATCGGA

GAATGCGGGCGTTTCATCACAAGAACAAGAACTGCGAGTCCAACCAGGTGATCTCGAAGGTGCAGCACGTGCTGCGCATAGC  
CCGCAACTCGCACCAGCTCTTCCCGCGCTCCCTCACCTCACGGTGCCAGTCTGATGAAGAAGTGAAGCTGCGCAAAG  
GCAACGGGGCGTGGGGCGACATGCGGGATCACGAGCTGTGCCTCAACATGACGCTGGCCACGAGGTAAAGCCGGGGAGCC  
CACGGAATGGAACCAATCAGTCAGCAGCAAGGAAGCCTAGCTAATAGCGTTATCTAAGTAGGATTATTAAGCAGTAGTC  
TTAGTCACTGTAAACGAACATTCAGCAAGTACTCTGCATTAGCTAACTAACCGAAAATAATCAAAGGCCAGAAGGCAGAA  
GCCGGAAGCCAGAAGGCATGAGCCGGAAACCGGAAACCGGAAGCCAGAAGCCAAAGACCCCTCGCCTCCGGCGCTGCACA  
ACTCATACTATAAGTAACCTCTAGTCACACATTCGAATTGGAATCGCCGTGTTGTTGCAACCTCCAATCTTGTGCCGTT  
GCCCTTCAGTTTTGTCGATCATCACTGGAAGTGT**TTAGGCTCCGTCCAGATCCAAAG**ATCGACAGAGTTCCAAGCGACGGG  
GCGGCAATCCTTCAAACCTGAAACCAGAACTAAACCTACGAATACTAGCGATAGACCATACACATACATACATATGTACT  
AACTCGTATCCCCAGATTGTGCCGAAGCCGTTTTCGCAAGCGGCCAATTAATTTGAGTCTAGATCTAGAGGCAGCAAATCG  
CATAAACTAGTCATAGCAATGTATTACAGCACATGCGCTATAATACATCATAGATCAAACCTTTTGTATATCTACGAGCC  
TACGTTTTTAAGCCTGTACATAGAGGAATTGCGTTGTATACATCACATAAGGTCTTTTTATGATATTAACGCGGAATAAT  
GTAATTTGTTATTTTTTAATCGTTAGTCCAAAGCGCTTTTTATGTATTAGGAATTTTGTATTAATCGAACGAATAATCCTAG  
TGAATAAACGCCAAGTAAATGCTCTACCAGTATAGACTTTAAAAACC

### 3. CG1105

ATCTCTAATCTCTGAATTCGGCGACCGCAGGGCGTTTTCAAACAGACCGAAAAGTCTGTTAACTTATTGGTGCCTTGAGTC  
ACAGAATCTCTAACATGGGCCCTTAAAGGTTGTGAATTGCAATTGGACAACCCGTGGAACACCTACTACGCCGGTCAGACG  
GTCACGGCCAGGTGAAGTTTACGTTGACTCGCCCAAAAAGTCCGAGGTATTATCATTTCGGTTTCTGGGAGAAGCCAA  
CACCGAGTGGTCAGAGGAGAAGAGCGTAACCACCAGCGAGGGCAAGACCGAGAACGAGGTACCCAACTGAAGGGGCATG  
AGGAGTACTTTAAGATCCAGTACTATCTGCTGGCGGCCAAAACAGCTCTGAGACGGAACCTACCGCCTGGCACTCACACT  
TATCCATTCACCTGTGCTCTGCCGCCTAATCTACCCTCATCTTTGAGGGCGAATTTGGCCATGTGCGCTATACCATCAA  
GGTGACGCTTGATCGTCCGTGGAATTCGATCAGGACATGAAGATGGCGTTACAGTAATAGCGCCCGTTGATCTAAATC  
TCAATCCTCGATCAAGGAGCCATTCAAGCTCGAGCTAGAAAAGTCAATCTGCTGTTTTTGTCTGCTCAGGACCGCTG  
GCTGTCTATCAGAACATCCCGCAAACAGGATTCGTTTTCGGGCGAGGTGCTGCCCATCACCTGCGAGGTGGACAACACCAG  
CAACGTAATCTTACGGCAGTGAAGTTTGAAGTGCCTAAGCTGGTACCTTCCACACAAACAGCCACGGAGCGAGAAGC  
GCGAGTCCAAGGTGATCATAGCCAACCTTAAAGTGTGGCCAGTCAATGGCGGCGAGTCTCGCACGTTTTACGCAACAAATG  
GAGATTCGGCGCTGCCACCAGCAACCTCCTCAACTGCGGGATTATCGCTTTGGACTACGACCTGCATGTGGAGTGCGA  
GGTGAGCGGTCCGCACCGCAATCTCACTGGCAAGGTGCCAATCACCTTGGGCACTATTCCATTGGCTGGCGTACGGCCAC  
CTACTCAATTTACGGATGCTCCGTCCGGCGTTCAGTCCGAGGATCCATCGCTGGCGCCACACAGCCAGTGAAGCCGGCG  
AGCCCTCCGGCGCGATGGCGTGGTGGTCTTAGGCTGGAACGTGGCTGACAGTACTGGTGGTGGTTCACTGTATCC  
TAATATACCGCCACCGCAGTTTTGTGGAGACACAGTACCAGGACCAACGATCGCCGGTAGGGACGACTCCGAGCATAACG  
AGATGATCGGCGACGGAGCCTTCGCACCTCGGTATCCGACTTTCCAGTTTTAATAATGCCACAGCACCGCCAGCTAGCCAG  
TGATTGAATCTCTAAGCTAGACCCACAATGATATTCTTAAACTTTGATGTGCAACTATTTTCTTCTGGCTGTCTCTGTTT  
CTGGAGGGTTAGCTTTTCGCAATTTTTATCGGCTTTGCATTTATGAAATATTAGCTT**TCCGTCCAAATAGAAAAGCATAAAC**  
AGGTGCAGTCAAAATAAAAAGGTCTACCTATACAAAGTTTTTGAATGCTTAACTTCTGTTTTATAATTAATAGCTTTC  
GGACAGTAAATACAAAGAATTGGGTCTTTATTATTTTACTGTCATCTGTGTTAATTTAATAATCGTATAAATACGCACA  
ATTGTCAATTCGGATTTAAACTGCTCAAATTTAATTTTTTCTGTTTTTTTTTAAGCCAGCAATAGTGCCTAAAACCTGATG  
TACGACTATAATCGTAATAAAAACACAAAAGAT

### 4. CG43367

ATGCGTCTGAAATGGAGCCTCAGTTATATCCAAATAAACACGAGAATGCCGCCAATCTGCGCGACAATGCGACCAGTGC  
CTACGACACCAAGGAAATCTCTGAATTTGACTCCACCATCAAGAATGCCGTGGTGCAGGATTTCTGGCGGATGACGAAA  
GTTCCAGCTGGAGGAGAACTACGTCAACTGATCGACACGCAAGCGCAACAGGATGTGGCGCTGGGAGTGCATGTCATG  
TCACAGGACTGTGAGCTGATCAGCTGATGACCAAGTGAAGGGACGCATTTAGGTTAACCAGAGCGTAACTCACCTTTGT  
GGACTTGAGCCCGCCAACAGAGGATGGTTCCAAATACGATTTTCAAGTTCTCCACCAACAAGATACGTGAGGTTTCACTG  
GAAAGTACAATCTGCGCAGGAGTGCCTTTGGAATCTTCTGGTGGATCAGACTAGCTACTTCTCAACTTTACGACGAAG  
ACTCGAAATAAAGTTTTTCAAAAATCGTGGGTCTACCCTTCCAAACATACTCTACGGCTCGGGAAGATCGCCGGCTGA  
GCTGCTTAGGGCTCGGGACTCACACAGAGATGGATCAATCGTGAGATTTCCAACCTTTGAATACTTGTATGACCTAAACA  
CAATCGCAGGTGCATCCTACAATGATCTAAGCCAATACCCCGTCTTCCCTGGATCCTTGCTGATTACACCAGTGACGTG  
CTGGATCTTACCAGTCCAAAATCGTTCGGTACCTATCCAAACCCATTGGATGCATAAATCCTAAAAACGAGGCCGAAGT  
GCGCGGCAAAATATGATTCATTCGAGGACCCCTCTGGTGCCATAACAAAGTTTTCACTACGGAACCCACTACTCCAACCTCG  
CCGGCGTGCCTACCTATTTGCTTCGCGTGAACCGTTACCTCGCTGCACATTGATCTGCAGAGCGGTGCTTTTCGATGTG  
GCCGATCGACAATTCACCTCGATACCTCAGACGTGGAAGTTGCTAATGGACAATCCAATGACGTGAAGGAGCTGATCCC  
CGAGTTCTTTTACTTCCAGAAATTCCTTAAAGAATGAATAAATTTGATTTGGGCCACTTACAAATAACCAAGAAAAGG  
TGGACGATGTCATATTGCCCTGCTTGGGCTACCACGCCGGAGGATTCATAGCCATACACCGACGGGCTTTTGAATCGGAG  
TATGTCAGTCAGCATCTGCACCCTGGATTGATCTGATCTTTGGGTATAAGCAAAAGGGACCCAAGGCAGCTGAGGCTCT  
AAACGTTTTCTATTATGCTCCTATGAAGGCGCTGTGGATTTGGACAAGATCACCAACCTGTAGAAGGGAGGCGGTTG  
AAGGAATGATTAATAACTTTGGCCAAGTGCCTTACAGCTGCTGCGGGAGCCACATCCACGACGCCTTACTCAGGATGAG  
ACGGCTCTAAAGCTGGTACGTGCTGAGCTCCGAAGGCCGGATCTTACTCAGTTCTGGACAAGGTGGTGCAGTACTACTG  
CGAGCTGTCACGCCAAGGATCCCATTTGTGTACTGAGTCCACCGCAAGTCCCTCCGCGATCGTTCTGTCAGCTGAGTC  
CCGATGTTCTAGTCAGCATATCGAAGTCCACCATATTTGGGCTGCAATTCGTGGCTATCGTTTTGATAAGGATCAGGGATTC  
CTGCTGGAAATCGATGCCACAACGGCTAATCTAAAGAACCAGCAAGCGGATCTTTGGACCCCTTCCACTCGTCACAGCAACC  
GCATTCACAGCTCTTTGCGGTGAGCACGGATGGTAAGCTGCTCTATGCCGGTGAATCTGGGATAACTCCTTAAGGGTGT

ACAATCTGAACAAGGGCAAGGCGGTGGCTTCGGTGACCCGCCACCTGGACATTATCACCTGCATAGCACTGGACAATTGC  
GGCTCGTACCTGGTCACCGGCTCGCGTGATTGCACCTGTATTGTGTGGAGCATCCAAACAAATCAGCAGGGCGGTGGATC  
CACTAACAAACATTCCAGTTCATGCGCTGACGGGTGAGTGCACCTACAGGCCATCACCCAGCTGAATACTCAGAATAGCT  
ATTCACCCAAGCCCTTGACGGTGTCTATGGTCACGACGATGCCATTTCCAGTGTAGCCATCTACACGGAACTGGATCTG  
GTGGTCTCTGGATCCCTGGATGGAACGTCAACGTGTACACACTTTCAGGAGGGTCAATTTGTTAGAACACTGAAGCCCAT  
TGGATGCACAGTGCCTGTGTACAAATCTCTTTTGTAAACCTTTCCATATCATGGTCACATTCAGTGCCTGTGGATG  
ACACCTCGCACCTGGTGCAGTGTACAGCATCAACGGGTGCAGTCTGGGCTCCAATAACGTTTCTGGCAGGGGTGACGGGA  
TTGGCTAGTGCCCTCCGACTACCTGGTGGTGGCCGACGATGCCGGGATATCACCATGAGCAGACTACACGGCTTGAAGCC  
CGTTTTCGACATTCCCCGTGCACGTGCCCATCCAGACGGTGGTGGTCACTCCGGGCAACACCCACATTCTGGCGCCGCTTC  
GAGATGGACGCTTGGCGGTGATCGCCGTGCAACTGCCCTCCGGCGGCAATAAGAAGCATTCCGTGCTAAATGTTTAGGTT  
CAGCAGGAGCTGGAATGAACACTGGCTGACCTACTGAATTTCCCGAATTTTACCCTCTGCGTAGCATAAGTTGTAGTCGTT  
CTAGTTTTCCTTCTGCTTTTAGCGCACCCCTAGTTTTATTTATTGTGTCTTGTGTCAATTTGTGCATGATTTATTTCTTA  
TCTGCTTCCCATGCTACGTGACGTGCCAAAAGCAAAGCGCCTTTGACCAACTCAAAAAATTTCCAGAAAGTTGACAAATG  
TATTTAGAGGTATTCAGCAAGTCGATCGATTGCATTCGCGGAATTTCCATGCCAACTAAGCATTATTTCCCATCACATG  
TGGTGTACACCTGTCTGGTGGCGATCCTCCATCCTGGGCGGCAGAAATGATGGATGGCACACTCCCCTTCTTCGCTT  
GATGAAAATCTGAATGAATAATCAATCATTCCATTTGTGGCGGTGCGGAGAGATAGCTCGGCAAATGGGACGCAGGAGAC  
GGAAATGGAGACGGAAAACCTGGTTGTGACGCACTTGGCAACTACAACACTTCTCTCTGACTCACGAGCGACTTTCAA  
ATTGGCCGAAATACAAAGAAAAGAATTAAGACCGAAAAAAAAGCGCCCGGCAACAGCGGCAAGGCGCTTAAAAAACGG  
CAACCGTTCCGAGAGATCGACGGCATCCAGCTGCTCGGTTGATCAAGAGAAACACTTTTCGTTGCGCCCTTTTTCGCTGC  
AGATAACAACAAAAATAGAGCCAGAGATCTTTGTCCCATTAAGTACGCACACTCGGATCGCATGGTATTGCTACCCAAT  
CATTAACAGAGCATTTCCAATTGAAGTATTATCA**CCACAGCACGATCACAGTCCGTCC**ACACAGATCCGAGATCCGCATA  
GGCAGACAATACCAATACTTGGTGGCCAGAGCAAGAGATTCTATCTATTTCCATAACCACCCAGTACGAGTACCAGCAC  
CAGCACCATCCGATCACAAACTTCTGCCTTTGATCTTACGCGCCAGCATTGTGAAAAAAAACCCCTCACAGACTC  
TGAAATCTGAATTTCCAAAGACATGCGACAATACAAGGTGACTTGAAGACATACATATATTTTACGAATCGTAATC  
GCATATATAGTATAGAATTTTCGCACAATCGGGTCTGTGAGATTAGCCCCGCTTTGGAGCCAACCTATCAATATCTATCT  
ACACCAGCAATATATAGTATATCATCTGTGTACGTAAGGTCTCCGGATCGAGATCGTTATTTGTTGTTAAGATCGTAT  
TGCAAAATATGGCAAACTGTTTTACCCGTTCAATGTATGTACGTAAGTGTACGAGTTTATGTAGATAATGTGACTATTC  
GTAGTTTGTAGATCCGTCAATAAAGTGTATGAAAAGTGTATGTACTCGTA

### 5. CG31195

AAACAATATATCGATACTATCGGACAGGTGGCCCATCTCTGTTTGGAGGCGTAGTTCCAACAAGTGCTGAGCATCACAAT  
TTTCTATTACTAAGCCAGCTTTGCGTTGGCGCGCCCCAGAATCTCATTTTATATTTAGTTTCTGCCAGTTTAGTTAATT  
AGTTAGTTGATAGTGTGTTTGTGTTTCTTCTGCAACAATTGTGTGCGATAGGAGTCCGGGCAAAATGTTCCCGTTCGTCGATT  
TTGGGGCGCAGCTATTTGCTTTTTATGCTGGTGTCTCGCCGTGGGCGTGTTCGCCAACACAGAGTGGCAGGCCCCGGGATGC  
CTTTGATGAGATAAAGAGGCAGTTCGACAAGGTGAACGCGGATAACTGCCCATCCAACACCATTCCGACCTTTTTCATGC  
CCATGGACGCGGTGTCCCACAAGCCGGACATCAAGGAGATCAACGTGAATCCGGTGTTCGCCAACCGAACTGCCCTGCTG  
CATCTGCAGAATATGGCCCTTAGCAGAAGCTTCTTCTGGAGCTACATCCTCCAGTCCGAGGTTTATTTCGACCCGCCATCAA  
CGACACCTACGATCCCGGCATGATGTACTACTTTCTGTCCACCGTAGCCGATGTATCCGCCAACCCACATATCAACGCCT  
CGGCCGTGTACTTCTCCCCAACAGCTCGTATTCTGTCGTGATCGCGGCTTCTTCAATAAGACGTTCCCCAGATTCCGG  
CCAAGAACCCTCAGGCTGGACGACTTCAACGATCCCATTCTGTCAGAAGATATCGACGTGGAATACTTTTCGATGTTCA  
GGATCTGGGCGCCATCACCCGACTCCATATCCAAGGACTACCCACGACCTGTATAAAAATAAACGAGTGGTACCCGCG  
CCTGGCTACCAGACAACGCTCGAGGGACGGCAGGATCAAGATCACCTACCAGGTGGAATCCGCTATGCGAACAACACA  
AACGAGACGTATACCTTCCACGGACCGCCTGGCTCTGAAGAAAACCTGGTCCGATTAAATTTACAAGCCGTACTTCGA  
TTGTGGCAGGTCCAACAAGTGGCTGGTGGCCGAGTAGTGCCAATTGCGGATATCTACCCCCGACACACGAGTTCCGTC  
ACATTGAGTATCCCAAATACACGGCCGTTTTCGGTTCTTGGAGTGGACTTCGAGCGTATCGACATAAAACCAGTGTCCATTG  
GGTGAAGGCAACAAGGACCTAATCACTTTGCGGATACGGCGCGGTGTAAAAAAGAAACGACAGAGTGTGAACCATTACA  
AGGCTGGGGCTTTAGGCGCGGTGGCTACCAGTCCGTTGTAAGCCAGGTTTTTCGGCTGCCAACGATGTCGGCGACCTT  
ATCTGGGCGAGATTGTGGAGCGGCATCGGCAGAACAGTACTACAACGAGTACGACTGCCTTAAGATTGGCTGGATCCAA  
AAGCTTCCCATTCAGTGGGATAAGGCCTCCTACCACATTGCCAAAAGTATCTGGACCGGCATCCGGAATATCGCAACTA  
CACCACCGGCTCGGATCACTTCATGCTGAGCACTTAAATATTGATCAGGCGTTGAAGTATATTCATGGAGTCAACTATC  
GCATTGCAAAAACCTCCATCCGCAGGATCTGATTCTTTCGCGGTGATGTGAGCTTCGGCGCAAGGAGCAGTTCGAGAAC  
GAAGCCAAGATGGCCGTGAGACTGGCCAACCTTTATTAGCGCTTTCTGCAAGTATCGGATCCCAACGAAGTGTACTCGGG  
CAAGCGTGTGGCCGACAAGCCGCTGACCGAGGATCAAATGATCGGCGAGACCTTTGCCATTGTCTGGGCGACAGCAAGG  
TTTGGTCCGGCCACAATGCTCTGGGAGCGCAACAAGTTTACCAATCGCACATATTTTCGCACCCTATGCCTACAAAACCTGAG  
CTCAACACAAGAAAGTTCAAGGTGGAGGACCTGGCGCGGCTCAACAAGACGCACGAACTCTACACGGAAAAGAAGTACTT  
CAAGTTCTGAAGCAGCGCTGGAACACCAACTTCGACGACCTGGAGACCTTCTACATGAAGATCAAGATCCGCCACAATG  
AAACAGGTGAATACCAGCAGAAGTACGAGCACTACCCAAATTCGTACAGAGCGGCAACATCAAGCAGCGCTACTGGACT  
CAACACAATTCGATCGCATGGATGTGAAGAAGTCTGGTGGTACCTATGCGGTGCCCCCTTCTTCGGCTGGGACCGCT  
GAAAGTCAAGCTGGAATTCAGGGTGTGGTAGCTGTCTCCATGGACATGCTGCAGCTGGACATCAACCAGTGCCCGGACT  
GGTACTACGAACCGAACGCCTTTTAAGAACACACACAAGTGTGACGAGCAATCGTCTACTGCGTTCCCATTTAGGGTCGT  
GGCTATGAAACCGGAGGCTACAAGTGGGAGTGCCTGCAGGGATACGAGTATCCTTTTCGAGGATCTGATTACCTACTACGA  
TGGACAGCTCGTGGAGCCGAGTACCAAAATATTGTGGCTGATGTGAGACCCGCTACGATATGTTCAAGTGCCGACTGG  
CCGGAGCTTCGGGCTGCAATCCGCTTTGGGACTTGTGGTCTGCTGATCGGGCTCACGCTCACCTGCTGTATAGATTT  
AGTTAAGCACCGCACGCCAAATAACTAACGCAACT**TCCGTCCAAACAAAACCTCACATCAA**ATCTCTCCACAAAAGATAT



AACTACAAAGCAACACAGACACAAAATTGACACCCAAAAACAAAACGAGCTGCCAGCCAGCCCAGCTCTCCATCGTTGCT  
CCCTTTGAACATTGTATCATTTATCTGCAAGGCGATTAAGTTGTAGACATAATCTATTACAATGAATCTGGTTATTTGT  
CATTTCTATCAAAGCGGCAGAAGACCAAGCAGCAGCAGCAGCAGCCGAAGCAAAAGCAGCAGCATCGTCAGAAAAGCGC  
AAACAGCCGCGCCTACTGCGCTCAGATTACGGAAATGCCGTGTAGCTCGTATTTTTCTTCTTCGGAAGATCCTTCTCTC  
TAATGTCGGTGAAGTGCACAGCTGTGTGTGCGTATGTGCGGCGATCGCAAACCTGTAAACATCGGAACCCAGTTAAGCC  
CAGGCGTACCTACACCATCGGGGAGGTCGTCCAGGTCCTAGCTGAGGGTTGTTTTGTGCCCACACACACACCTTTTTCC  
GACCAACGGATGCCACAAAAATCCAACGCCTGCCGTCTGATTTTTTTCTTATATTAATCGTCGATGGTCTGTGGCTGCG  
ATTTTTTTTTGCTGAATTAATATGTATGTGATGCTGCTGCCGCTGCGGCGTTTTTTTCCACTTTTTTGTTTTTTTCGCGCTT  
GATTATCATATGCGCTTGAATTTTTTATTATCTGTACCCTGAGAACTTTTTCTATGCGCTGCAGGAACCCAGTTTAGCAGCC  
ACTTGGTCTTCTACCAGGGCAAAAAGAAATCTCCAGCTTTTTTTCATTAATACTTTATAGCCATAGGTAGCTGGACAGGGG  
CAGAAAAATCTTTTTTACACATTTTTTTCATAGTCATTTTTCAGGGCAGCAGCGGTGGGCAGTAACGTCTCAGCATTGGGC  
AACTCCTCCATTTCCATTTGGAAAAATGCCCGCTGTGCTAAAACACGTTTCGAGTGGCTGGCCGTGTCCGCTTTTGGTTT  
TGTTTTCTGGAAGTCTTGCCCCCTGAACATTCCGCAATTTATTTGTAGATCAGTACAAAGCAATGAGAAGAAATCGAATG  
TGAAATTTGTGCCTTAAACTGAATTTTGTAAACACAACAGACTATATCAAAAACA **TCCGTCCAATGAGTAGTCTACTTTG**  
TATTATGTATCTACATATCTGAATTAGTGATAAGTGCCCTTGAGACAAAATCGAATAACTTTTACAACCTGCTTGAGTAGT  
CTAATGTCTAGAATTTAAGTGTCTTATAATTTTAAAGCAATCCATCCATATATACAATGTTCAAATATATGATTTTTGTAG  
T

## 6. CG8121

CCTGGAAATATCTAAGCCCTGATTCGTATGTTTTGTTTTTGATGCGTTGCGTGGTGATTAATATTTTCGTTTTTTTTGGGCT  
GATTAAGGATTGATAAAGGACTTGCCTTCTTATACACGTGACGAGACTTAAAAGGCTT**CATGATGAATTACGGTAGGAA**  
**AACGCCCTCCACATATCGGTCCAATCCGTGGTTTTATTTCCCATGCCACGGGAAGATCCTCGACGAATTTACACTCCAAGA**  
**TGTCCCGATCCACGCGATCCGTCCAGGATTCCTTGGTACCAGCAGCCGTTGCCATTAATAACAATCAGTACATCGATATACAG**  
**AAGGTTGCCATCTGGTTCGGTTCGGATTTTTTTCCTTGTCCCTCTTACCATCGCCACGAGCATTTTTGACATCTACTG**  
**CTATGCTATGGCTGCGCCAGGATCCACACATTATGGCTACTACATCATATCCTATGAGTTCGTCTATGTGGGCAACAAGC**  
**ATGTTTCGCAATATGCTCATTGCTTTTGCCTGTTCTCGCTTATCATGGCGCTGATAAACTTTGTGACCAGTGTCCCTCTC**  
**TGCGTGGCTCTGCGCAAGGAATACGAGAGGAAGGTTATGCCATGGCTGTGGTCTTTTGGCCATATTTACTGTTTTGGCGGGC**  
**TTTGGCACTGATCTTCTTTGCCATTGTCAATGATCTGTACTTTGCCTACAATGTGATTATGGTGTCTCTTTGGACCATTT**  
**TTTGTGTACTGTCTATATATGGATGGGCGTGGTGTACTCTCTGTTTTTGGAACTGGTGGATCTGACCAAGCTGGAGGAT**  
**CTAGCCCATTTACGCATGGGCACAATGGCTTCCCTGCACGCATCGACAGCAAACCTCACTTGCAGGATCACGGCCAACCAC**  
**TCCTCACAGCACCCTGTCCACCATGCCCGTGGGCTAA**TAAAAGTATTTGCCATCCATCTATGGGGCTCACAACGAAATTG  
CACAATCTAGACCGTCCGAATGCAGCTCAAGATAACCCTGATGCTTCGCACTCAAACATTTGCTTAAACTATAGTGTACAT  
TCCATCCACCAGTTTAGTGCCCTTAGAGATGCGCCTCTCGAATACCACAAATTTTAAACCGCAATCAGCGTAATTAGTTGT  
AAGT **CTATTCGGTCCAACGCATATGTTTTTT**GTATACTGTTGAAGAATCGCTGTCTTTATGTATGAATGTCAAATATC  
GTGTTTTTTTATATTCATATATAGATGTACAACCCGAATTGTAGCTATGTATCTAAAATATTAAGCGACAAGCAATATAAA  
AAATACGAAACCGAAAATATGA

## 7. Mcr

AACGGTACACTGCATCAGTCATCAAAGCGGGTGTGGATCGCTGTTGGTTTTGTGTTGTTTCATTTTTTTTGAATCTTTGA  
GTTCCCGAGTTAGTTTTTATTTACCTTTCTGTTGTTTAAATAAAATGTGCATGGCCCTGCTGAGCAGCCAGATTAGATCGAAT  
TTCAGTACCGAGCAATGATGTGGCACTTGTGCGCGCCCTGCTCGTGGTAGCCGCGCTTTGGATGCACCTCAACCGCGG  
GTCCGACAAAACGACAAC**TACTACAACCCCAACCAGAACCAGCAGAATCCCAGCAGCCGCTACTGCCCAACCAGCAGTG**  
**GGTAAACAATCCACAGACGAATCAGTATAGCAACAACAACAAAAC**TTTTGGCCAAACGAATCCCAGTGATCGCCCGCCGT  
**ACAGGACCGATTCCGGGAGCTACAACGATATTGCCGGGCAAGATGACTATAATAAACGAGTGGGAGGAGGCTATCAGGAC**  
**AACGAGGAGCCGAGTCTGACTCGTGGAAAGTGCCTCTATAACATCAAGGCCACCTTCTGGAATCGCTGCATTCCAGGGA**  
**GCCCATTACTTTCATTGTGGCATCTCGAATGGTGCAGACCTGGTCTAATCTATCAGGTGTCCGTATCCATTCTTCAAGCTC**  
**AGTACCCGATAACCGTTTCATGCCAGCATCGCGTGCATGGTGTCCAAATCAGCGGAGACTCTAAGGATGTCAAGGAGGGC**  
**ATACCGGAGACGTTGCTCATGAGGATCCCACCACTAGTGTGACTGGAAGCTATAAGCTTCGAGTGGAAAGGTTTTCTACCA**  
**GAACGTTTTCCGTGGCCTCGCCTTCTGAACGAAACAAGACTAGACTTCTCACAGCGCTCCATGACGATATTTGTGCAGA**  
**CCGATAAGCCTCTTTATATGCAAGGGGAACTGTGCGATTTAGGACCATTCCGATCACCACCGAACTGAAGGGATTTGAC**  
**AATCCCGTCGATGTGTACATGCTGGATCCAACAGGCATATTTCTTAAACGTTGGCTATCGCGTCAATCAAACCTTGGGTTT**  
**CGTTTTCGTGGAGTACAACTTTCCGGATCAGCCCACTTTTTGGAGAATGGACTATCCGTGTAATAGCTCAGGGACAGCAAG**  
**AGGAGAGTCACTTACCCTGGAGGAATACTATCAGACCCGATTCCGAAGTGAATGTTACCATGCCTGCGTACTTCTTCCACA**  
**ACGGATCCGTTTTATCTACGGAAGGGTGTGGCTAACTTTACCAGTGGCCTACCAGTTAGAGGCAATCTCACAATCAAGGC**  
**CACGATCCGCCCAATTGGATACTTACGCAACCAAGTTCTAAATGAGAAGTATCGCCTGGGTGCTTACCTTTGGAGCAAA**  
**CTAACCTATACAATGAGCGATGGCGCTACAATAATCCCAACCAGAATCCGCAAGTGCAGTATAATGTGCCTGGACAACCTG**  
**CCACAGGATGGAGCAGATCTTTACAGGATATTTGTACAGGAATCAATATGTGGTTCGAGCGACACTATCAGTTCGACGA**  
**GGATGGCCATCTGGGTTAGGAAACCCGAGTATCAGGACAGCAGTACGAGCGTGGAGTGGAACTTATCGAAAGACCC**  
**TGCCCTACTTGCCTACTTCAATGGTACCTTTGACTTCAAGTGGCCATTGAGGGAGCTAGAGACTTCTGGTGGCCCAACTG**  
**GCCAACCTTGAGGTGCTGATCACGGCCACTGTTGGTGAAGGTTCTACGATGAGATCATCAGTGGTTACTCCGTGGCCAG**  
**GGTGTATAAATCCAGTCTGAGGGTGGTATTCCTTGGCGATTGCGCGAGGCTTCAAGCCCGCCATGCCATTTACCACAT**  
**ATCTGGCTGTTGAGTACCATGATGGTTCGCCAATTGATCCAACCTATTACGCCAGGGTTTTAATGGAAGTCTCTGGTTTC**  
**GTGGAGAGCCGAATGGTGGCAGGAGGGACTGGCCCGCCAGCGATTGCCTATGTGCGAGCAAAGCGATGGCATTGTTGGA**  
**GGTGAAGATTGACATCAGGAATGATCTGAACCTGGACGATCGCCACAAGCAAGAGACTTCTTGAACGGCGTTCCAGAACA**

TGCGCTTGCAGGCGAACTTTTGTGGATCCGCGTGGTGAACGCATTCAAACGGAGCTCCTTTTTGGTGTCTCACTATTGCCCC  
AGAAATCAGCACATTAAGGTCACCACCAGCACAGAGAAACCAGTGGTTGGGGAGTATATCATCTTCCACATCCGCACGAA  
TTTCTACCTCGAAGAGTTCAACTATCTCATTATGTCAAAGGGTGTATCCTGGTGAATGACCGCGAAACCATTACAGAGG  
GCATTAACCATTGCTGTGTCTGAGTCCGAAATGGCACCTGTGGCTACGATTGTAGTGTGGAAGATTAACCAGCAG  
GGACAGGTTGTGGCCGATTCCTTACGTTCCAGTTAATGGCATCTCCCGAATAACTTTACCGTATATATCAACAATCG  
CAAAGCGAGAACCAGGAGAAAAGTGGAGGTGGCTATCTTTGGAGAACCAGGCTCGTATGTTGGTCTCTCTGGCATCGACA  
GTGCATTTACACAATGCAAGCCGGCAACGAGCTCACTTACGCCAAGATCATCACTAAGATGTCCAACCTTCGACGAGCAG  
ACCAATGGAACGTATAAGCACATTTGGTACTCTCACGAAGGCAATCCCGATGAGCTGGTGTACTTCCCCGCTCGTCTTT  
TGGCGTCGATGCAAATCGCACTTTTGAGTACAGTGGACTGATCGTATTTACGGATGGTTATGTACCCAGAAGGCAGGACA  
CCTGCAATCGTACTTTGGGTTTTCGGAGAGTGTGGAGTGGACGTTGTTATCGCCTGGAGAAGCAGTGGCATGGTTTTGTTT  
GATTGTGATGATGGAACGGATGAGATCAATTGCCATGCGCGTAATGACACAGAGCTGTTGAACTACAGAAAAGTACCGATT  
TAATCGCGTGTTCGCCATTACGAAAATGTGTGGCTATGGAAGGATGTGAACATTGGACCACATGGTCGATACATTTTTTA  
ATGTGGAGGTGCCGATCGCCCCGCTATTGGATGGTCACTGCGTTTGTGTGAGTCCATCGAAAGGCTTTGGAATGATG  
AACAGGCCCTGGAGTACGTTGGTGTCCAACCATTTTATAAACGTGGAAATGCCGGAAGCTTGGCGACAAGGCGAGCA  
GGTGGGCATCCGTGTCAGTGTTCCTCAACTATATGATAACTCCCATCGAGGCGATTGTCTGCTGCACGACAGTCCGGACT  
ACAAGTTTGTGCACGTGGAGGAGGATGGCATCGTCAGATCGTATAACCCAGAACTAGCTTTGGTGAACATCAATTTTTTC  
ATCTACTTTGGAGGCTCAAGGCACGACGGTGGTTTTACGTGCCGTTGTACTCAGCGTCTAGGCAATGTGGATGTGACCCT  
ACAGTGGCCACTTTACTTTGGAACAGATACCATAACCGCAACACTGCATGTAGAATCGGATGGTCTGCCACAGTATCGTC  
ATCAATCCGTGCTACTGGATCTCTTAACCGCGCCTATGTCTTAGAATACATGCATGTTAATGTAACCTCAAACGCCAGAA  
ATTCCATACCAAGTGGATCGTTACTTTGTGTACGGCTCAAATAAGGCTAGGATATCCGTAGTGGGTGATGTGGTTGGTCC  
CATTTTCCCCACCATGCCCGTAAATGCCAGCTCCCTGCTTTTCTTGGCCATGGAGTCGGGCGAACAGAATGCTTTCAGCT  
TCGCCCGCAATCTCTACACGATTATGTACATGCGATTAAATTAATCAACGCAACAAAACGCTGGAGAAGAATGCCTTTTAC  
CACATGAACATTGGCTATCAGCGGCAGTTGAGTTTTATGCGGCCGATGGCAGCTTCTCACTGTTCCGTTCCGATTGGAA  
CAACTCCGATTTCGCTCGTGTGACTAGCTACTGTTAAGGGTGTTCAGAGGCGAGCTTCTACGAAATGGGAGAACT  
TCATCTGGATCGATGCCACAATTAATGAAAAGAACATGAGATGGCTTCTGCAACACCAGCAGCCACAGGGATCCTTCTTC  
GAGGTCAGTGGCTGCCGGATAGGAAGATGAATCGCACCAACTTTGACAAGAACATCACGCTAACGTCATGACTCAT  
AACCTTGGCCACCGTAAAGGATATCTCTGGCACTCTGGGCTCTCGAGTTGCTTTGGCCACGCAGCGTGCCTTGGCGTATA  
TAGAACGAAATATGGACTTCCCTTAGACACCAGGCGCAACCTTTTGTGTGGCCATTACAGCGTACGCCCTGCAGCTTTGT  
AACTCTCCGATTGCCGAGGAAGTATTCGCCATCTGCGTGCAGGCGAGGACTATAGGCGATTTTATGTACTGGGGTAA  
CCAGGAAATACCTCAACCTCCACGCAAGCTGGAGAATCAAAGTGGTCTCGCTGCCCGTCTGCCATACGAATATGATT  
CGCTGAATATAGAGACAACCGCCTACGCGCTATTGGTTTTATGTGGCGCGCGTGTGAGTCTTTCGTGGATCCATTGTGCGA  
TGGTTGAACTCGCAGCGCTTAAACGACGGCGGATGGGCATCCACCAGGATACCAGTGTGCCCTCAAGGCTCTTGTGGA  
GTACACAGTCCGATCTAGGCTGCGCGAGGTTTTCTCGTTGACCGTGGAGATCGAGGCTCTTTCGAGGGCGGCAAAACAC  
AAACGCTTTACATTGATGACACGAATCTGGCGAAATGTCAGAGTATCGAGATTCCAGATGCCTGGGGCACCATCAAGGTT  
CAGGCCAAGGGTGTGGCTATGCCATCTGCAGATGCACGTGCAGTACAATGTGGACATTGAGAAGTTCCAGACCAAGCC  
GCCAGTGCAGCCTTCGGACTTCATACCAAGGCAATCTTCCACGGCAGGAATCAGTGCATATCTCCTATGTGGCTTGT  
AAAATTGGATAAACCAAACGAGTCGGAGCGCTCAGGCATGGCGGTCTTGGATGTGGCCATACCGACTGGCTATTGGATA  
CAGCAGCAAAAACGGATACCTATGTGCTCAGCAACCGTGTGAGAAATCTGAGAAGAGCTCGTTATCTAGAACGCAAGAT  
TGTCTTTTACTTCGATTATCTTGTATCATGAGGATATCTGTGTAACCTCACCATTGAGCGTGGTATCCAGTGGCCAATA  
TGTCTCGCTATTCGCCGTTGCGCATTTACGACTACTATGCACCAGGAACTCAACGAATCCATATCGATGCCCTGCC  
ACATATCTGCTGAACATTTGTGAGGTGTGCGGCGAGCTCTCAGTGTCCGACTGCTCCATCTACAACATGGGCTGGCGC  
CTCCATGTCCATGTCCCTGCTCTTCTTTCAGCGTATTATATACCTACTGCGAAGTGCACGCACCTGGTCCATAAACATGA  
TGCAACTGCTCACATAGAAAAGAAAACGAAACGCTATTACAAAAGTACCCTCGAAACAACCTTGCTAAGATTGCTAATGTT  
TTTGTTCATTTATTGAATGTGTTTTACTTTGTAGTTTTTTTTGTTTTGAGTTGTAGTTTTTTTTGTTTTGCCAACGAAAT **TGCAT**  
**TCCGTCCAAAAATGCTGGT**CAACATTTTGGTTTTATTTTTAGTTCTTTTTCAGTTTTACTCCACTGACCCGCTGTATAATT  
GAATGTACAAAACAGCAGTTAAACGTAATTTAGATTTTTATTTTTATTGCTGAACAAAAGAATCTTCTGCCACACGTAGCAG  
ACCACATGTAGCCACCTAATGTATCTTGTAAAGTGCCTAACGAACCGTACTATGCCTTATCATAGAGCGGGCTCCAAGTGGC  
GAATGAAAAAATCAAACAATGTGCTTTTCAAAAATGCCTTTAATAGATTTTAGAAATCATTAGCGAATGTATCTTGACA  
AAAGTTTGAAGCATATCGAATGGAATTTATCTAATTTGTATTATCTAACTCTTGAATACATTTTTTAAACGAAATGAAG  
TGAAAATCGTTGAAGAAACCGTCCAATTAATTTATGCAATAATGAATCTGCATAGTTTGTAAAGTTTTATACGTATATAC  
GCCTTCATATGAACCACAATTAGTTTTATAAATCCCAACACAAATCTCACATAGCCATGTACATGAAGCTACTAAGCGAG  
AAACAAGGAAATTTTTGTACACAACCTAAGAATGTGCTCCTTTCCGTACCATAAGAATCGAATCGAATCTCTATGAAGT  
GTCTTGTGTTTTCTTTTGTAAATAAACGAAACCTGAAAATAAATAAAGTAATGTTT

## 8. Tsf2

GTTACACTGGCTTCCTTGAGCTGGGCTTGGGTGTGGTGTGTTTTGTTTTGAGTAATTGTTTTTGCAGATAGATCTTTTTAGTT  
AATACACTTATTAATATCTTATATCCCGAAT**ATGGCTAGCAGCCTCGTTTTTGTGGCTCTAGTCGGCGCCTTATGTTTT**  
**ACGCTCGCTAACGCACAACATCACTACGATGAGCACAAAGACCACCGGATGGTGTGGTGCACCAAGAGCCAGGCGGAGCA**  
**GTACAAATGCCAGAACCCTTACGGTGGCCATCGAGCGGGATCGGGCACTATTTCAGCAGAGGTGTTCCCTCAATCTCACCTGCT**  
**TCATGGCC**TACAGTGGGATGAGTGCATCCATCACATTGATCGCGAGAAGGCACACATCACCACGCTGGATGCGGGCGAT  
GCTTTCAGTGTGGACGGTACAACCTCCCTCATACCCATTATGCAGGAGAACTGGAGGGCGGCTTTGCGGACTATCAATC  
CGTAGCCGTGATCAAGAAGGGATCTCTACCAGACTTGAACAATCTGCGCGACATGCGCAACAAGAGGGTGTGCTTCCCCT  
GGGTGGGCAGCTTGGCCGGTTGGATTGTGCCATTACACGCTCCAAAGGGAGGGCGGCATGGAAGTGGTGGACTGCAAC  
AACCAGGTGAAGACGGCCGCGAGCTATTTCAATAATTCGTGTGCTGTGTACTCGTTTTCCGACAAAACAAATCCAATTGG

CGACAAC TCCGATAAAC TTTGTACGCT TTTGCACTGGAAAGATACCCGGAGGACGCTGCTCATCTGCAGATCCCTACTTCG  
GCTACGAAGGCGCCTTCAAATGTCTGCCTGAAAAGGAGATGTTGCCTTCTTTCGCGCCATTTCGACTGTGAATGAAATGCTG  
CAAACCACCGAATCAAGAACATAGCACCCGACACTTTTGGAGCTGCTGTGTGCTGATGGTTCGTCGCTCCATCAACGA  
TTATCGCCAGTGTAAATGGGGCCAAGTCCCCCGCGATGCCATTGTCACATCTTCGGCTCGCAGCTTCAGCGATCGCAAGC  
AGTATCAGCAGTTTTTGAAGCGCATGCCGAGCTGTACTCCGATGGCACACGTCGATGATCAGAGCAGGCGAGGACAA  
AGCTTCAACAGCCGCAACAACATCAACGATCAGAATGCCTATGGCCAGTTCGATAATAATGATCCGTACAGAACGCAGAA  
TCAATACGATCAGTATCGCAGCGAAGATTGGACAGCAGTTTTTGCAGAGGAAAGAAACCAGCAGGACGGCACGAACACTT  
CCATAC TCTATGAGAAGTTCCGCATCTTCGAGTCGAAGCGCTATGGCAAGCCAAATTTGCTGTTCCAGGATTCTAGTCG  
GCTCTAACCGTGATTCCCAGGATGATCAGTCATTTACCAAGTACCTAGGCCCTGCCATTAAC TTTATCTACGGCATCCG  
TGAGTGTCCAGTTCCAGCGATGACGCTTTGCGTGACTTCGGAGAATGAGCTTGATAAATGCATCAAGATGAGGACTGCCT  
TGAAAGCTCACCTCCTGAAACCAGAACTCATCTGCAAGAAAATGCCTCCACATCAACTGCATGCAGTTCATCGAAGCG  
GGCAAAGCAGACATCTCCGTTTTTCGATGCCGGCGATGTCTACACTGGTGGCCTCAACTACGACCTGGTGCCTTCATGTC  
GGAGGTGTACAATCTGGGCGAGCCGAGTATTATGTGGTTGCCGTGGCCAAGGAGGATGATCCCATAACGGAGCTAACTT  
ACCTGAAGGGTAAGAATACCTGCCATACGGGCATTAACACCGCCGCTGGCTGGACATATCCGATGGCGCTTTTCATCTCG  
AACGGCTGGATTTCGTCCTACGGATGCGATTTCGGTTCGAGCTGCCGCGGAGTACTTCACCAAGTCGTGCGTGCCGGGTGC  
CATTAGCAATGAGTACAACACCGGTGTGCCCTACGACAGCATGTGCGATCTGTGTCATGGAAGTACTATCGCTATTGTC  
GTCGCGATGCCCTCCGAGGAATAC TACGGGCACACGGGTGCATTCCGTTGCCTCGTCGAGGGCGGCGGTACAGTGGCCTTC  
ATGAAGCACACCACGGTGATGGAAAGCACGGGCGGCAAACGCAAGGAATGGTGGGCCAGGAATGCCCTAAACGATGACTT  
TGAGCTGCTCTGCACGGATGGTACTCGTGCCGAGATCCAGGACTACAAGCGCTGCAATCTGGGCAAGGTTAAGGCCAATG  
CTGTGGTACCCGCGGGCGGAGTCAACTACAACGAGACCCAGATGAATGCCTACATCAATCTGCTGACCTATGCCCAACAA  
CTGTACGGTTCGCAAGGAAGTGGACGCCTTCAGTTTCAGCATGTTCTCCTCGCCGATCGGGCACTATGATCTGATCTTCCA  
GGACGCCACGCGGAGCTGCAAGTAATTCGCCCAATAAGCAGGATGATGCCTATTTGGGACCGCATTTTTATGCGAG  
CACGCCGATCACCGCATGCTATGCTGGTGCTCCAGTTGGCATTATCCGTGGGCTGCTCCTCGTGGGTTTCGCTGGTT  
GCAATGCTCTAAGCCACTAGACTCACTTAGATTTTCAGAATTTTACAAGCATCTCTAGCACAAAGAGAAAACATATCAACA  
TTTTTACATTTCCAAATATGATTAAGTTAAATGTGAAAT **CCCTTCGTCGAAAATGAAACT**CTAACTAGCCGAAAAATAT  
CTGTTGAAGGCTATAGTTTATAATTTATAAAGTCCGTGCTTATTATAGTATTTGTTTGTGTACATAACCAACTAAGACC  
GTCCAAAAATGTACCTAGGAGATGTAAGCCGAATCTTTTACAACCGCTTATGTAAGTATACAAATAAAAAATAACTAGATA  
AAG

**9. cals**

ATTTCATATATACTAATGTAATACATATATGTAATCCAACAATCAGTTTTACTGTGGTACATTTTTATAATGTTTAATCATA  
TATAGTCACGGGAAC TAGAGTTTATACACGGTCTCGAATAAAATGTGTTTTGGAGCTCAAATAAATATATTTGGGCTT  
GATTATTAAGAAC TTCGAATAGAGCC **ATGACGTTTTACAAAACCTTTGGTTACGGATGCATTGTATTAATATGTTTTGA**  
**ACTCCTGTTTTGCTGGAGTTGAAACGTCCAGCGAAAATGATGATGAATATTTAACACAGAAAGAAATCATATTAGAAAAGT**  
**CATATCACGGTTTTAATTCGAGAAAATGAAACACTTTGTAGAAAATACTCCCTTATTAAAGTGAACGAAGAGAAAATTTGT**  
**AAC TTTCCATATTTCAAAAACCGTATCACGAAATTCATTTAAGATTGAACTGGTAAATAACCTAGGTATTTTTAAAAGC**  
**ACGTCCGACACTAAATTCGCGAGAATCGTAAAAGTTATCACTTTGAAATCTGTGCAATCTATTGTGATGGAACACCTTCAA**  
**ATACAGCCAATGTTTCATATTACTGTTATCGACGTAATGAGTATGCTCCAACATTTCTAGAACCGTCTTACGTAATTGAA**  
**GTAGACGAGGGAAGACTTTATAACGAGATCCTAAGAGTCGAAGCTTCCGATAAAGACTGCACTCCGCTCTTTGGTGATGT**  
**TTGCAAAATAGAGATTTCTAACAATGATGAACCTTTCAATAGATAACGAAGGTTCAATTAAAAACACTGAACCACTTT**  
**CTCACAAGCTTCTCATAACCACATTTCTGTCGGTGGTTGCCATGATTGTGCAATGAAAGAATGCAACCCATTATGGT**  
**AGCATTAAAGTTCGACGCGTTTTGTGAAACAAAGTTTTGTAGGCATGCCAGAACGATTGACTACACGCTCGGAAGCACCGA**  
**AAGCCTTCAATGTTTTCCAATGCTCGCCTAGACTTATGTGACATTTCTTGCAAAAATGAAGAAGACCTTAGGATTCATT**  
**CTTCCATAGCCCTTAAGGTAAGCACACATATTTTTGTAATAATAATATTAATTTCCAAATCACGATTTGTTCTACAATTTA**  
**TGGGACCATTAAAATCAAAAACACCTCTTACCAGATTGGGTTGGGTACCGGTGCAGATAGCATCTTCAACACACGATATA**  
**ATAGATATCAACTTTTCATAAACCGTGTGGTTAACAATAATTTTTAAATATTTTTTGTGGGGGTGATACCCCTAACAGCC**  
**GCATCAGGACAAAATGTTATAATGTGTACTTTAAGCTTTTCATATTTTTCTCCTGAAACCATATCATTTATTACAGGCTTG**  
**GTATGCAATCCCTTTAGTATTTTCATAAATTTGGGATTAACAGTTTTCTGCGGCTTGATGAGTTCGAGTTGGCATTCCA**  
**TTTCCATCGAAATGGAAAGACATGTAATATCATATAATATAATATCTTATAATATTATATAATATAATATATAATAGA**  
**TCCAATCACTTTTCAAAGTGTGAAC TTTGTTAGTTTTGGGCAGCTTGTGGCAACCATCTAAAACAGAAGAGTTACTATAA**  
**ACTGCATGCTCAGTCTCAACTCTCTGACTTTGTAGTTCCCGAGGTGAGCGTT CATAGACAGACGGACGTGACCAGATCGT**  
**CTCGGGCCAGATGAAGAATATATATGTATACTTCTGACTACTTTTCAACTTTTTACTCTTGGAGAAAATGTTTTATAA**  
**GGTCTTTTTTAATGTTTTCAAATAAGTATCTAATCCGAAATATATATTTAAGAGGATAAATGTTACATATAACCTGTTTTTT**  
**AAAAATGATCTGGCAAGATACCAACTTTGCGGTTATGTTACTTCACGTGTTTGCTTTAGGAACCATTTTCGTAAACCTG**  
**TGCATCATAATGAACCAATATGAGTATAAGTTGTTAATTTCAATTTATTTTTAGGACAAAAGCACATCTCATTGGGTGC**  
**GATCGGGATATATCTAATTCACCTCAGGCCAAAAGTGAAGACCTTTTGCCACATGGGGCAGAATGGACTAAAGAGTT**  
**AAGTTATGACGAAGTCTAGAACCCATATTTCACTTTGATGGGTCTACTGGAGTAGTAGTTCTCGCAACTGTTATTGATC**  
**ATTACGATTTTTCTCGACACTTTTAGCATTACCTTATTTGCACACACAGTCAAGTTCAGGTTGAAATTAATAAACGTA**  
**AAGGAGCATATTTGCTGCAGCGCGGACGACCACAAAATGAACCGTCATCATATGGCACTATTTCGTTTCGCAATTTGCGCCT**  
**TATTTTTTTATTAAGAAAAAATTTTAAACGAAGGTGATTTAAATATCTTTAGTCTGCTGAATGGCGTTGGAAAATACCGG**  
**AGGCTGTGACAACGAATGGCATCACTATGTTCTCAATGTTGAAGATTTCGTCCAAAGTAGATTTATTTATTGACGGCGTA**  
**CGTTTCGAAAATTCATTTGAAAATCGTCATAGCAACCCAGAAGTAATTGACGATTGGCCCTTACACGCAGCCACGGAGT**  
**AAATACTTCTTAGCTATTGGTGCCTGTTACCAAAGCTTGAAAATAGACTTAAACATGGCTTTAATGGAGATATTTAG**  
**AAGTGAAGGTCTCCCTCAACAGTGTTTTACGGCAGAGGACATTAATGTGGAACAACTTGTGCCGAGCATTTATTAGCT**

CCAAAGCCGCTGCAAAGTAACAATGAAAAATCGTATTCTGATAACAGCCAGATTAAAGAAAAACATTGAAATGAACGAAAT  
TTATATTTTCGGCGAAAAACAACATGATATTGAACAATTTATGCGAAAAAGTTCAGTATATTAATACTAAAACAAAAGCCCA  
CGGTAGGACGTCGAAACATAGAAGTGCCTTACAACACTGAATTGTAAAAATGAAAGTTCCCTTCGCTTACCGCCAATTGAG  
ACTTATATCATGGTTAACGAACCGATAGCTCCACTCGGGATCGATATTGATGTGCTCTCAGCGTCGGTAAATAAAAAATT  
ATACCGTTATTAAGAGATATCACTAAAAATGTATATCAATCTTACAGCTGGAACCTCCGATCTAACTCCGCCATCGTA  
TTCCCCAAAAATAGCAATATCTGGTACGTAAACTACACTATGATAACACTTGCCTTAGATGGTAGTTTTTTCAGTCATATGAAA  
CAATTCATAATTTAAATTTGTGACGGCCGTGTAACGTACCGTGTAAATTTTAAATTTTAAAGCCATAGGCACCTGTTGCCGTT  
AGGGCCGAAATCGCAGTCGGCTACTAATAAAAAATTTAATTTCTCCATATTACTTTTTTGGAGAGATAAATCGTGCGCAAG  
AGAGTTGGTACACGCATCGTGCACCCAATGCAGTCGGCTCTACTTTCGCTTACCGCTATTTTTGTGATGTGTTTCAACAGC  
AATGAATTGTTGAACGGAAGTATAAACTTAGGCTATAGATGTAATTAATGGTTAATTTTTTATTTTATATTATATTGTA  
AATTATTGCATTACATGAATGAGTTTTACATTTATATATGTTTATACGACTCTGATAGTTGTTGGAATCACGAATTGCAA  
AATAAAAAAGCAATTTGAAAATAATACAAATGGTCTAAAACTGTTGTAATTGGTTGGCGTGGTCAAAGTTTACTAACGC  
GTCAAAACAACATAACAAATTTATCATTATATATACTAATAACAAATACACAATTTATTAATTCATTTTTGTAATGTTATTT  
CCTGTTGTATGATTTTTAGGAACTTCAAACAAGCTTGTATCATATCAAGAAATTAATTTGGGCGTACACATTTTTGAAAA  
AACTTGCATTGACTCGGTATCTAAAAACAATGGAAAATTAGAAGAGAAAAATCATATCGACTCATGCAGCGTCGTTGTAT  
TTCCCTCTTTGAATCCCGATCATGAAGACATTAATAATAGATGGTGCAGGTCATTGTCTCATCTAGCATGGACATTAAGACT  
AATATTAATAAGGATGGAGTCGAAATGATTGGAAGGATACCATTAGCAATTATATAAATGTATTACGATCTCTTGTATA  
CAGTAACAAAAACCTGCATATTATCTTAACCGTGTATTTAAGCTTTCTTGTGCCAACAAAGTTCCCAGTACAAAAGCG  
GTGAATATACACTAACACTTACTGTGTTGCATCCTAAACAGACATTGTTTAAAGTCTACAAATGTACTCCCTTCATCGTTA  
TCTAAAGTAACTTTTATTGGCAACACCGATAATGAAACATCATTTCACCGGAATAGTGGTTCCGGTAAATGGCAATGATAA  
TAATCAGCCAACAGGTGGGTTTCCAATACTTATATATAAAAAATATGTATAATATATTTAATCCTAATCTTTTTAGAGTCT  
AAGGTATATTCATATCCCTTCTGCATACCAATAATGTGCAAGAACCAAAATCTCACATTCATTCTTTTATACACAAAAGG  
TAAATGGCATTGTAAAAAAGTTTATAAAAAATATAGAAAAATTAATCTTTTTAGCTGAAGGGTCACATGTTTACAATG  
CTTATAAATCTTGTAAAGTGTTTTTGGCGGTCTTACTTTGTGGAGTCTCGATTTCAGCTTTTTAAAAACAACCAAAAAATA  
TATTGAACACCATCAACCATGTCCAAAAGTAAGTATATTTTACAACCTGAAATTTGAACTCATTTTTAGTATACCTTTGCCA  
ATGATATATTTTTCGTTCAGAAGTTTGAATACAAGACACTCTTGGGTCCATATAGTGTATAATGTGCTTGATCAACAGTT  
ATAGCCGATATAGCTATGTCTGTGCTTCTGTCCGTCCTTTCAAATATGTGCATCGTATTATATTTTTACATTTTTTTCATCT  
GGAATTTTCTACTATTGAATTTATATTTTTTATAGATTTCTGATGATGGTTAATTTGGGATGACTCAGCTTTGACTATAA  
CTATAAATCCCATGCAAGCAGATGTTACATCGGACGCGAGTCTGAATCAGAAAATCTGAATCTGAAGATGAAGAAGGT  
ATAGAATATATTTTAAATATTTTAAATCTTAAAGAGATATCTTTGGCATTAGTAGCTTTAAAGGACGGATTCACTC  
ACATCAATCAACTCGAATGGGATAACTCTAATATTTTCCAACAGTAAATAACATAATGAATATTTTTTCTCAACACTGGTA  
CTAAAAATATGTAAATGTGCTTAAAAATATAAACTAAATCAACAAATATGCAGAAGTTATAAATGAGTTCCAAAGAGT  
CTGCATATATGGCTGCAGGCATAATTTGTAAAGACGTGCATTTTATAGTTTTTTTTTGAACAAAAAACATTTTTCTTGAAT  
TGTTTTAATTTGTAATACTAAGTCAGTGAAGTGCATAACACATCATATGAATGTACGTAAAAATAAGCGCAACAAAAA  
TATAGCTAAGGTATAGTACAATTATTATGTAACCAGCGTCGCTAGATCCATAAATAATAAAGCTATAGGCATACAAATA  
TACACATAAGATCTATTTAATTTATAGTTTTGTGAGCCCTCACCTAAGATGTAAATGCACATGTCTACCAAATTTCAAC  
TGAATTCGTGCGCAATGCATAGGAGGAAGTTTCTCCGTCCTAATAATAAAACATAAAAAAAATTTG  
AAATGGATCGTAATACCAACAATGTTGACTTATTTAATAAAGCTAAAGTTGTCAATTGATTTATTTTTTCAAGTAT  
ACAACCTTAGATTAAGGAACATATCGAAGCTATAAAAAATTTATTTTCAACCGACCATAAACTTGTGAAATGTACTTTTA  
AAATAGAATTTTTAATTTGTTTATTTAATGGTACTATTTATTGAAACATAATTAGTTTTCCATTTTTGAATGGCGAC

10. emp

AAACAATTCACAAACACAATCGAATATCAGAACACCAGTACACTGTAGTGAAGCCAAACAGTTGGGAGAGTGCTCAAAAC  
CCTTTGGAACCTTTGAAATCTTAATGGAACCTTGATCGTTGGCCATGCAGTTGGACGACATTCTGCATACAACAAATGCG  
CCACTTTGTACGACAGTTTACATAAAACAGAAAGGTGCGATGCAACCCGGTTAGCCTTATTGGCATGCAAAAGTCAACCGCGG  
AGTCAAGCTTCGGATACGGGTCTCCATTAAGTTAACAACCTGCAAGGCGGATTGCTCCTCACTCTCCACCACACCCAACCC  
CAAACCGACTTGGTCAACATGAACGGGCCGAAACACAAGTTTTGCACAAAACCTCTCCAGCACCTATCTGCGAAAATGGT  
GGATTACGATTGTGCTGCGAGCGGCGCTGATAATTGGCGGCATTGTGGTGGCCTGTGAATTTACCGTGCTGATTGATGCG  
GTCGTGGACCGAATGGTGGCCCTGCGTCCCGGCGCAAGACCTTCGGATGGTGGGCCAAGCCCCAGTGGAGCCAGAAT  
TAGTCTGTACATCTACAACGTAACCAATGCGGACGACTTCCCTCAGCAACGGCTCCAAGGCCATTGTGATGAGGTGGGAC  
CCTACGTTTACAGCGAGACCTGGGAGAAGGTGAACATCGTAGAGAATGACAATGGCAGCCTGAGCTACAATCTTCGCAAG  
ATCTACTCGTTCGCGAAGATCTGTGCGTGGGGCCGAAGACGACGTGGTTATTGTACCCAACATTTCCCATGTTGAGCGC  
CACCTCGCAGAGTAAGCACGCGGCCGATTCTTTCGCTCTAGCCATGGCCAGTATCATGGACATACTGAAGATCAAGCCAT  
TCGTTCAAGGTGTCCGTGGGTGAGTTGCTTTGGGGCTACGAGGATCCTCTGCTCAAGCTAGCGAAGGATGTGTTCCCAAG  
GAGCAAAGCTGCCCTACGAGGAGTTTGGCCTGCTGTATGGCAAGAAGGACCTCCTCCGACCGAGTAACCTGTGAACAC  
AGGTGTCGATGACATTAGGAGATACGGCATCATTGACAACCTCAACGGTCGCACCCATTTACCCCATTTGGACCACCGACG  
CATGCAATACTTTGGCCGGAACCGATGGCTCCATCTCCCCCAACACATATTGACCACGATCGCATCCTGGATGTTTACGAC  
AAAGATCTTTGGCGGCTCCTGCCCTTGGTGTTTGAGAAAGAAGTAATGACTTCAAACGAGGTGCCTGGATACCGGTTAC  
CCCACCAGATGGGTTTTTCGCCGATGTGGACAGCCACCGGACAACATGTGCTTCTGTCCCGGGCAAGCCGTCATGCT  
CCCCAACGGACTTTTTCAACGTGTGCTTGTGTCAATACGACTCTCCCATCATGCTAAGCTTCCCTCATTTTCTACCTGGCC  
GATGAAAGCCTGAGGACGCAAGTAGAAGGTATTTCCGCCACCTATGAAAGAGAAGCATCAGTTTTTTCTTCGACGTTTACGCC  
TAAAATGGGAACCTTGTAGAGTACGCGCCCGTATCCAGATCAATTTGGCCGTTAGCCAAGTGTGTTGACATCAAGCAGG  
TAGCCAACCTCCCGGACATCATCTTTCCCATCCTTTGGTTCGAGGAGGGCATCGACAACCTTCCCGACGAGGTACCGAC  
CTGATGCGCTTTGCGGAGCAAGTGCCACCTAAGATCCGCGTGGCGCTAATCGTGGTCTATGCGCGCTTGGTGTGATCCT

ACTACTGCTTTTCGACCTTCTGCCTGATCCGCAACTCGCACC GGCAAAGCACCCCTGCACTTGGAGGGGTCCAAC TATCTGG CCACCGCCAGGTGGACATGAACAAGAAGCAGAACAAGGATAACCAACCCGCCAGATACTAGGCGCTCTAGTCGGGTGTCT GGTTCGCAGTACGAGTGTCTTCGGGTGACTTCGTAATAGTATAAGCCGTAGCTAGTAAC TGGGACCTGCCACTTCCACTT CCACCCCAATCCCTATAACGATACCCAATCCGACCTCCCTATGTTAATCCCATTCCCCGCGGAGGAATGTGCTTCTATG TAGTTTAAAAGAAATGGAGCTGGGAAGACTTGTATGTATTTGTATGTATCTGTATCTATTGTATTGTATG TAGGTTAT CTGTGTAAGTAAGCGTTATAAAAAATTTGAAGTGTAGTCTTAACGAAACAGTCTGTATCGCTTAAAGGCTCAAAGCTTCGA CTTAGACAATATTTGTTTATACCAAAAACAGCAATCGATCCTGTTCTTGCTTTCTTAAACCCCTCTTGAATGAAATTTGTATG TACAATCAAGTCACAAAAC TCGAAACGTTTCTCAAATAAAAACAAAAT **TCCGTCTCGAATACAAATGTGCTT**TATAAGAC CAAATGCTGGGCATGTTCCGCATATGAAATTTATATTCTATAAATACATAA CTTTATCGATCTAATGTACAATTTATATT CATTAAATGTGTACAATAAATCACGATATTATAATTAGAGATTGGCC

**11. IqfR (Epsin)**

TTGGAAACACTGTTTGCAACACTGGACACGACAGCTCACCAAATATTAGCTGCTGTGATTTTTGTTTTACAATTTTCGTTT AAATTTTTTACATTTTTGTTTTGCGGAAAGCGCGGTGCGAGACAGGTGCGCCGTTTTCCATGCAAAAGTGCAAAATCGTCAGC TGCAAAACAGTCAGAAAACGGCAGCCAAAGCGAAAACGAGTTCGACGTCTTGTGTAGTTGGATTTTTCCAGCCACTTTTC GACGAGATTGTGTGAAAAATTCGGTAGCATTCAATAGTCTCAAATGGTGGATAAATTCATCAGCATGTGGAAAGTGGCGC GAATTTGGCGGACAAGGTCACCAATGTCGTGATGAATTACACGGAAACGGAGGGCAAGGTGCGGGAGGCCACCAACGATGA TCCTTTGGGGGCCACAGGACCCCTCATGCAGGAATTGGCCTATTCCACCTTCTCATAACGAAACATTTCCCGGAGGTGATGT CCATGCTGTGGAAGCGCATGCTGCAGGACAATAAAACCAACTGGCGACGCACGTACAAGAGCCTCCTTCTGCTAAACTAT TTGGTGCGAAACGGCTCTGAACGGGTGGTAACCTCCTCTCGGGAGCACATCTACGATCTGCGCTCGCTGGAGAACTATAC ATTCACCGACGAGGGCGGCAAGGATCAGGGTATTAATGTTAGGCATAAGGTACGAGAGCTTATAGACTTTATT CAGGATG ATGATCGTTTTCGCGAGGAGCGCAAAAAGGCGAAGAAGAACAAGGACAAGTACATCGGCATGAGCAGCGACGCCATGGGC ATGCGAAGCGGTGGCTACAGCGGCTATAGCGGTGGATCTGGAGGAGCGCGGCGGTGGCAGCGGTGGCTACAATGATGGCGA CTATCGCTCTAGTCGTGGAGACAATTTGGTACTCCGACAAAAGCGCCGCAAGGATCGGTATGAGGATGATGATGATGATCACT ACAGTAGAGAGCGAGAGGGATCCGATAGCGACTCACCCAGTCCAAGACGTAACATATCGATACAATGACCGTGGAGTCCCT GCCGAAGTAGCGAGGAGGCCAAACCTTCCAGCCTCAACATGAACATTCGTTTCAAGACCGTCAGTTCCCTGTCTCCAA GCAGCCACTTCAACGGCTTCTGCCAAGCCAGCGCTGTCCAGAAGAAGATCGATCTGGGTGCGGCAGCAAACTTTGGAA AGCCAGCTCCTGGCGGTGCTGCTGGCATTCACTCACCAACTCACCGTGACACTCCCACCAGCGTGGACTTGATGGGCGGC GCTTCGCCATCGCCGCTACTTCCAAGGCAACAATAATACGCAAGCAATAACAACGATCTGCTGGACGATCTGTTCAA GACCTGCTCGCCACCGCCGGGGCAGGAGAAGACGCTGAACAGTGTCTGCCGTGATTGTGGATGACGATGATGACTTCAATC CGCGTGCCAGCGATGCTAGCCAGCAGGAATTCGGCGACTTCGCCTCTGCTTTTCGGGCAGCCCTCGGCGGGATCGACGATC AGCGAGCCACCATCAACGGGCTTGGTTCCGGCTGCGAACGATGAGTTCGCCGACTTTGCGGCGTTCCAAGGCTCGACAAC GTCGACATCTGCGCTGGACGGTAATTTGCTGAAGACTGCCACGCCGGCGAACGATTCGTTTGACCTGTTTAATTCAGCTC CCACCTCGACGGCAGCAGCCACAACGGCTACAGATCTCCTGGCAGGCCTGGGCGATCTGTCCATTACCAAAGCATGCC CCATGGACAATATGATGCCCTCCATTCCCGCCGTACGGGCAATAATCTGCTCCAGCCCATGTCCGGTGACCAATAATAACAA TAATACCAACGGAGGCGCAGTCCCGCCGCTGCCAGTGTCCAGTCTACCGCTGTGGGCGCCACCTGGTTCGGGCGACCTGA AGGGCGGCAAGATGAACATTGACCTGGACAATCTGCTGATGAGCAAGTCGGGCAAGCCAGTGCCCCGGCCCCCTTCGATG AATGCCCTGAAGACCAACAGTCCGGCAAAGGCGCCACTGAATGTGCAGACGGGTGGCGGATTCCCTGGACTGTGCCAAT GACCAGTCCGAACATTTTTGGGGCTCCGGCACCCGAGCAAAAGCATTCCACAAAACCAATCAGCATTGCAACTTTGGAG CTTTCCAGCAGCAGCAGCAATCACAGCAATAATAACAATAATAGCTCGTCGGCATTGACTTGTTCATGATATTTTT TTAGCCTAATTTAACCCAAACCAACTACTACCCAAAATGTCCACTCTCACATTTCCACGATCGCTAAACTTGTC AGTTCTATATATATTTACGTTTTCCTTTTCCCTTGCTGTACAAAGTTTGGCAGACGTCGAATTTGTTTCTAAATTCGTT GTTAAACAATTTACCCCGATGCAATTTTCCGGATCAAACCCATTAATTT **CCACATCCGTCTGATCGTCCACTCGGA**ATT TGAAAGTCGTATCAAATGCAATACACAGAGTAGTTGAATAATGGTTGTAATAAACGATTTCGTTAGCACAAACGCGCGGA CGGACGGCTGAGCGATCCAACATTGAAATTTGTTAAACAAAATACTACACGTAATAAAATCAAACAATTTTAGCAATAGTT AACGTTACGATGTGTCTGTATATAAATTTGAATGTAAAGCAAATATGAAATATAAAACAATTTGAAACC

**12. Ptp99A**

AGTTCTCCAAAGCACGCGGTGTATAAGCACGTATGTAGATT CATAGATACATATATCGGTAGCACCAAAAAAAAAAAAAA AAATAAAGAATCGAGCAAACCAACCGCACATAATAAACCTTATCAATAAACAACGCTGCGAAAGAGAAGCGACAAGTGA CGAAAGACATAGCCAGTAGTGTCTCGTTTTCGTCACAACAAGAGCAGCCTCATTGAGGCAAATTCGTGTGACGGCGTGGT GTTCGTAGTTATTGCGTACTATTTTTGTCAGTGAAGTGGCGACACTGCAGTTGCCAATATGACGAGTGACGTAATTTGTGC AAGTATGTAGGCGCAGATCGCGGGTACACGCAGCGAAAAAGGGAGCCACACTCTACACACATATGTCGTGACGGTGGCGGG GAAAAGCGCTGCAGCAGCCCCATGCTGCATGCCACATCGGAAATCGGTGGTGAAC TACTGCAACGCCCGCGCCTGCTGCG CCGCAAGTTCGCAGCGCGGAAATTTGGTTTTACAAAGTGTCTCCATGCGGCCTACTACTATCTGGACGACCCGCCACACCATC CAAATGCCCGCGCAGGTGGACTGGGAAGTGCCCGTTAAGATCGGCGACGAGATCCGAGCGGCTGTGCCCGTCAACGAGTTC GCCAAGCACGTGGCTTCCCTGCACGCGGACGGGACATTGGATT CAGCCGGGAGTACGAGGCCATCCAGAACGAGTGCAT CAGCGATGATCTGCCGTGTGAACACTCGCAGCATCCGAGAAACAAGAAATCGACTACATCAATGCAACTCACGGCCTATG ACCACAGTCGGGTGCATCTGCATCCACACCGGGACAGAAAGAAATCTGGACTACATCAATGCAACTCATCGATGGC TACCAGAAGGGACATGCCTTTCATCGGCACCCAGGGTCCAATTGCCGACACCTTCGATTGCTTTCGGCGCATGATCTGGGA ACAGAGGTTGGCCATCATCTGTGATGATCACCAATCTTGTGGAGCGCGGGCGCAAGTGCAGCATGTACTGGCCGAAGG ATGGGGTGGAGACCTATGGCGTAATCCAGGTCAAGCTCATCGAGGAGGAGGT CATGTCCACGTACACTGTGCGCACCCCTG CAGATCAAGCACCTGAAGCTCAAGAAGAAGAAGCAGTGCAACACCGAAAAGCTGGTCTATCAATACCACTACACCAACTG GCCCGACCACGGAACACCCGATCATCCCCTACCCGTGCTTAACTTTGTCAAGAAATCCTCGGCGCCAATCCCGCAGAGG

CTGGTCCCATAGTCGTGCACCTGCAGCGCTGGCGTCGGTTCGCACTGGCACATACATCGTCTGGACGCCATGCTCAAGCAG  
ATCCAGCAGAAGAACATCGTCAACGTCTTTGGCTTTCTGCGTCACATTCGTGCTCAGAGGAACCTTCTGGTGCAGACCGA  
GGAGCAGTACATATTCCTGCACGACGCTCTGGTGGAGGCCATCGCCTCGGGGGAGACCAATCTGATGGCCGAGCAGGTGG  
AGGAGCTGAAGAACTGCACCTCCCTACCTGGAGCAGCAGTACAAGAACATCATCCAGTTCACACCGAAAGACATACACATT  
GCATCCGCCATGAAGCAGGTGAACCTCGATCAAGAACCAGCGCCCATCTTCCCCATCGAGGGCAGTCCGGGTGCACCTTGAC  
GCCAAGCCGGGGCAGGATGGCAGCGATTATATCAACGCCTCGTGGTGCACCGGCTTCGGGCGACTGCGGGACTTCATAG  
TCACCCAACATCCCATGGCGCACAGATAAAGGACTTCTGGCAGATGGTCTGGGACCACAATGCGCAGCCGCTCGTGTG  
CTCTCATCACCTGGATGATATAAACCTTTGCACAGTTTTGGCCAGATGAGGCCACGCCCATCGAGAGCGATCACTATCGCGT  
CAAGTTTTCTGAACAAGACCAACAAGAGCGACTATGTGAGCCGCGACTTTGTTCATCCAGTTCGATACAGGACGACTACGAGC  
TGACGGTCAAGATGCTGCACCTGTCCAGTTGGCCAGAGATGTCCAATCCCAACAGCATCTACGACTTCATCGTTCGATGTG  
CACGAGCGCTGCAATGACTATCGCAATGGACCCATCGTCATTGTGGATAGATATGGTGGCGCCAGGCGTGCACCTTCTG  
TGCCATCTCCTCGCTGGCCATCGAGATGGAGTACTGCAGCAGCGCAATGTGTACCAGTACGCGAAGCTGTACCACAACA  
AGCGACCCGGGTGTGGACATCCAGCGAGGACATCCGCGTCATCTACAACATACTTTTCAATTTTTGCCTGGCAATTTGAAC  
CTGCTGAAGCGCAGGGCGCTTCGGACTGAATTCGAGGATGTGACAACGGCCACGCCGGATCTCTATAGCAAAATATGCAG  
CAATGGTAATGTTCCACAGCATGTCTACTGCAGCAGCAGCAGCTGCACATGCTGCAGTTGCAGCAGCAACACCTAGAAA  
CACAGCAGCAGCAGCAGCAACAGCAGCAGCAGCAGCAGCAACAACAGACAGCACTCAATGAGACAGTCAAGCAGCACA  
CCAAGCACCGATACTAATCCAAGCCTCTTGCCATTCTGTATTGCTACCGCCACAGTTCCTCTATCTCCAGTTTC  
ATCCACCACACCACCACCAAGTACTCCAACACCACAGCCCCACAAACCATCCAAGTGTTCATCGCATTTCGCCATCCG  
ACCTGTCCCACCAGATCTCATCCACAGTCGCCAATGCAGGATCACAGCAACTGCAAGTGCAGGGCGCAACACCAACGACT  
CCAATGACACCGACAGTCCCACCCACAATACCTACAATACCATCACTCGCATCCAGAAGCTTAACCCCTTACTAATGC  
CAATTTCCATACTGTTACTAATAACGCTGCTGATCTGATGGAACACCAACAACAACAATGCTGGCCCTGATGCAACAAC  
AAACGCAACTGCAACAACAATAACAACAGCAGCCCGCAACAACATCACAACAACGTCGGTGCACCTGCTGATGAACAATGCG  
GACAACTCACCAACCGTTCACCAACGATCACCAACAACATCATATAACCAACAACAGCTCACAAGCCGACAGCAGCGAC  
AGATGCTCAAACCTAGATATTGTAGGCTAACTAAAGATAAATTTACAGAGAGGGAATTTAAATCATTTTATAAATGTT  
TAAATATAAATACCTAAATTTAAACCTTACACCTACGTACATAGCGATGTATTTATTAAGTCTAAGTCGTTAAGTGAG  
AACAGAGCGTCTAGCGCTGTGTCCATAAATTAATCAACAATTCGTTTGGCCCTGTAAGCTCATATTTACTTTAACTTACA  
CACCCACACTCAGTTGTTTTCCCCAAAACCTATCTAAATTAATTTGTCTTATGTAGTAGTTTTTATATCGTAAACATAGGT  
TTTTTATACACCATACTTTACCCACATTTAGTACAGAGGGAAAAACAACAAGAACGAAAGTCAAAAAGCCGAGTGAAGA  
ACAAGAATAATCGCAAATCTAAAGTGGAAACGTAGTGGAAATGCACAAATCGAACAAGTAGAGTTAATAACATATTTGTC  
TAATCATTTAAATACGCTGATTACACATAACTAACGTTAATGCAGGCTAATGCTGCACACACTTGTGCCATGATTTTTTT  
AAGCTCTCCCAAGCAAATTCCTATTAAGTAATGAATATTAGTTGTTGAATTGAATTAGTTGATTGAGCAATCAATTTGC  
ATTTTAATTCGAATCGATTTCAGTCCGTCAGTACTGTTTTCATTTTTGCCTTCCTAACAATTTGGTTCCACTTT  
AAGACAGTTTAAATGCAAAATGACAAACTTAAGCGAACCTAGCTACAAATTAATTGCGAATTTAGTGGGCCTAAGCCGAA  
TTACCGAGCCTCTACACCACCCACACCACACATCACTGTAATCCCAATCAAAGCTAAGTAAATCACACGATTTCCG  
CACAAGCACAAGAGCATCACGAAAATTTGTAATACAGCTTAGATCAGATAAAAAGATACTGTATAAATGTCAGAAGTCA  
GAGAACCCTTCACACTCTGCAAAGCTAATAATATTGTAATAAATAAATAAATTTAAGCGAACCGGACAACCTATAAGTGT  
AAATCGGCAAAGTAGTCGCAAGCAAAGTATTATTAACCTATATGATACGTGTGAAAAGTGAGATAAAAAGAAAATCCCAAT  
GAAAACCAAGCTTAAGTTTTGTTTTCCCTCTATCGATGCGTAAATCTAGCCTGTACAGTTCTCTTAAAGTTAGACCCGAA  
TGAATATGATTAACCTAGCACTCTGAATGGCCATAGCCAAATGGTTTGGAGCTCTCCAATCGGGCAGTTAGAAAAGTA  
TATACCCCCACAAGTAATTTAGTGAATATTTTACATTTTATATGTAAGTATTGGTGGAAATGAAGAACATACGAAAC  
GATGAACAACATGTTTTAAAGACTGGTTTTTTGTACACTTTTAACTGTAATAAGCATGCATGACTGATGATTATGTAA  
ATGATTATATGAACGAATGTCAAAGGTCCTTTCAGTTGCCCTCCCCGCCCCGCAAGACCTGTCCCGAATGTAGTTTCC  
ACTCAATCGCATGTAGTCAGACTACTTGCAGGATGCAGACCGAGGATTTGGGAGCACACTTCAATATCCGATCGTATCAAT  
CCAATCATTGTCAGCTGATACCAATAGGCGGCTCTACATGTTAAACAACCAACTAATGACCAATTTTTGTGAGATTATG  
TTTCTTAGGCACTAGACCCGACTTAGGCTAAGACTACTTAAACGCTAGAAGGGCTTGTAAATTTCTCATACCGACACCGG  
CGGTGGTAACAAATGCTTCATCTGTAATATAACGACAAGAATCATATTTTCGATAACAATACTAAGGCAGGCAATACTA  
TGCATTTTAACTGTTAAACACACATAAATAGTAGTGCATGATGCAACTATAGGTGGATATTTCCATGCATTATGTACA  
TAATGTTGTAAGTAAAAGAAAAGAAAAGAAAAGCTTAATCAACTGCATTGCGAATGAAGCAACGAACACCTTTTGTG  
TGATCACACAGAGTTCTACCGAAATCTCCCAATTAATGTGCACACTCTTTTCGAGCAAATGGAATCCTTTCCGCGACTA  
AACTACCTTCACACATTAACTAAAGTAATTGAGAACGATAGAAACAAGGCCACAGATACAACAGATGATTATCTCTAATT  
GACGGTGTATGCAATTTATAAATGTGATGAATGTCAAAGTTAAGCGTAAACAATTTAAAAGCAAGCGAAGAAAATACAA  
AAACACAAAAAATAACAATAAAAAATAAATATAAATATAAATATAAATATAAACAACGATTCATGAGAAAAGAGCTGA  
ATGTAGCGAGAACTTAAGTATCTAAGCATGCCACGATTTTAGAGCTAAGCAAATAGATGAAGATACAAAATACAAAATACA  
AATACCCAGAGGCAGACCATAGGTTTTAAAGAACGAACGAAGCATTGCCCCACATCCTGACAGGTTACCGCAGCTTGTA  
GAGGCCATTGCAGCCGGAGGAGTCGCCACAGAGATCGGACAAAATCTCGCGATAAACAGAAATTAATGATATGAGTATATG  
TATGTATATGTATGTACACCTAAGCTAATCGTAAGCCAATGAAAGTTGAAATGGACTAAAGATACATGGAACAGACAACA  
TTGAAAGCGTCTAATAAAGAACATCAAATTGC

### 13. Sema1b

TCTAGCCCACGTTCCGTTTCGCGGTCCGCTGGTCAAACCTCATGATAGTAAAAAACAACAACGAAAACAGCCGAAAA  
CACAAGACAAAAACAAGTAAGCCGGAAGAAACTGGCGAGAAGAAAGTGTGCAGAATTCACAAGTAGCCGTTATATA  
AGTGGATTTAATTATCTGATTCGGTTTTGCGTTTTCCCTTTTGGCCACCAACAGCTAATTGCATTTAAATAAAAACAACA  
GTTGTTCTGCTGGGCGTAAATCATTGTGTCTGTTGTGCTGACACTCGAATACTTATAGCCAGATGCTGAAGCAGCAGCAG  
CAGCAGCAGCAGCAGCAATAACACCAGTAATCAGCACAACCTATCGACGACAATGGCAGACATCGGACATCAGAATGC

GAGGCGTCAGTGATTAAAAGCAGTCGGAGAGGCCAGCCAGCCATCCAACCAGCCAGCCAGGCAGCCCCATTGGCACCACG  
AGCAAAAAGCAGCTGAATCATCAGAAGCTCGGAGGAGTAGTGGAGTACTAGTTTCGCGCATCTCTACTACAAGCCAGCAG  
AATGAGCTCCAAGAGCAGACCTTCATCGGCGGCGATGTTAGTTAATGCGATACCCATGATACTGCTGATCACCTTATCCG  
GCTGACGATCGTGGCAGGTTGGATGCCCCAGCTGAAGCCTGATTTGCAAAACAAAACAAGACAAAAGTCTAGCCCATTTT  
ATAGGCAACTCGACGGACTATTTCAAGATTTTGGACCACAACGATGAGTTTGTCTAGTTGGTGCAGGACGTCATCTA  
CAATGTGAGCTAAATGGCTGAAGGAGATTGCGCGTCTGGAGTGGCAGCAGCAGGATGCGGACGGGAGCTGTGTGCC  
TAAAGGGGAAGCAGAGTGGGATTGCCATAACTACCTTCGCGTCTATGCACTGCGTCCCAATGGCGAGGTTGCTGCTGC  
GGCACC AATTCGTATAAGCCGCGCTGTCGTCACTACACGCCGGTGAAGTGTATCCGAGGAGGCCGGCTCTGCTGGTCA  
CGCCCATGCCATGCGCTACGAAGTACGCCGAGATGTGGAGGCCAGGGCCTGTGCCCTACAGCCCCGCCACAATAGCA  
CGTACGCCTTTCGCCGACGGGCATTTGTACAGCGCCACCGTGGCGGACTTTTTGGGTGGAGATCCTCTCATCTACAGGGAG  
AACCTGCGTACCGAACAATATGATCTCAAGCAACTCAACCAGCCGGACTTTGTTGGCGCCATCGAGCGCAACGGTTACGT  
GCTGTTCTTCTTCGCGCAACTCTCAATGGAAGTCACTGAAGTTTGGCAAGGCCGTTTATTTCGCGCGTCCGAGGGTTTGA  
AGAACGATAGAGGTGGTCCCTACAGTACGGCAAGAGTTGGACTTCTTCTTAAAGGCGGACTCAACTGCTCGGTGCC  
GGCGAGTTTCCGTTCTATTTTACGAAATCCAGGCCATTAGTCCGATTGTGGAGAGCGGATCCAAGTCACTGATTTATGC  
TGTCTTACAACCTCTGTGAATGCCATTCTGGCTCGGCCGATGCGCATTAACTAGACGATATACTGGCCGCTTTG  
ATGGAGAGTTCAAGTCGCAGAAAGATTACAGTCCCATTGGCTGCCAGTGGAGCGTGAGCAAGTCCGAAACCACGTCCA  
GGACAGTGGTGGAGACTCTAGAACTCTGACCAGCATCGCGTTAATTTTATTAAAGAACCATCCCTTGATGGAGGAGG  
TGTGCCAGCAGTGCACGGTCTCGCTGCTGACCAAGGTGAATCTGCACCACCGACTTACTGCGATCGCAGTGCATCCGC  
AGGTAAGTCCC AAGTGGAGCTTACTACGATGTTATATACAGTGGCACCGATGACGGCAAGGTGACCAAGTTTCAAT  
ATACTGAGCACTACCCGAACCTCAACTGTTGATCGCCTGAAGACAGTGGTTATATCAGAGATGCAGGTCTTCCACTTGG  
AACGCCAATTAGGGAATTGGTGTCTCCACTTCGAAAACCTGTTGGTTGTGGTTAGCGATGGCAGCTTGGTTAGCGTGC  
CCCTGCACCACGCTCTCACATTGTGACTGTCTGGGCTGCTTAAAGTCTCCAGGATCCCATTTCGCGCTGGGACTTACAG  
ACACAGAAATGCAAGAACCCTGGCTACGAGTCAAGTCAAGTTCGGAACAAGACTTATTGCAAGCTTGAATAGCACCAA  
GAAAGCCGCTGCCTGCTATGCTCATATTTCCCGAGTGCACCCGGTGCAGGAAACAGTAAAGCTTTGTTACCATGCTC  
CACGCCAACAGAGGAGCAGAAGCTTTTGTACTCCAATGTGGGCTCGTGCAGGGCAATCAGCCAAGCTTGAACAACAG  
CCAAC TGGTGGCGATGACTTTGGTTTGAACAAGATCACCTTACGTCCATGGATCCCGACGATATTATGCCGAATTTGAA  
CGATCCCCAAAAGTCTACGGCCAGTGTAGATGAAATCAAATATGCTTCAACGCCAGCTTTCATGCTACTTACAACATATCG  
TTTTCTTTACCTTCTTGTGGGTGGAATCGCAGGAATATGCTGTGTGAAGGCTAAGAGCCGCCTGATGGAGGCCAAAATG  
GATGAAAGTACCGCAATCATTTTCGGCAAGCCAATGCAATTTAAACATCAAATACTGGCAAAGACATCAACCTGTTAAT  
GGGCTCCAATGCCATACGACCACACAAAAACACCTAATCTGGATTTAGAAAAGGATCGCAGTCAATGAGTGCAAAAAC  
CCACGGAACATTTGGAAAAGAGCTGCCCTGCAAAACGTCAACGCTGACAAAAGTGAACGCACCTTACATCTAGTGGCCT  
TGTGAGGGCAGCCAACCTGCAAAATTAGTCAATTTCTATACTCTAAAACATATTTTCGTTGTTTATGTTGCTGTTAGTTA  
TAGTAACCCCCACCAATTTGCGAATAATGTAACGACAGTCTCGGATGCGTTTGAACGCATCCGAAAGATAGGAAGC  
AGAGCTGTTGCGTCTTTTTTACTTAGCTTGTATTGTAATTTAATTTGATGTAATAATTTGCGTAAGCTTAGTTTCTTTGTC  
AAAATTTAGTTAAATTTATTGACAACGTAGTGTGCGGGCTGCCGACGCTGGAGCTAACCCGAAGCATTCCGCATTCCCC  
TGACGTCGACCTTTGCTGTCCAAAATAGGAGTGCCGGCTCTTGGCTACGCAGCCGATTGTGTGCCCCCTTATGTGTA  
CTTAATGTATAATCTTTAAGTGCAATATTAGAGCTGTACAAATTTAATCACATATCATGCATACCGAAATCGAACCCGA  
AGCGGACCAGCCCCAATTTCTCGAAATTCATCGAATATTCAACAAGTATTTTGTAGACTGAATGATTAATTTATTC  
TATATGAGTTTGTTTTGTGGAGAATAACAGAATGCGACAGAGACTTAAAGCTCTATGCTTTGTGGCTAACAAAAGCGT  
AAAATGTATCTAACATAAGCTCTATAAGGAATGAACATAGAATGTAATTTAAAGTACGAACTAGGCTAAGAAACGAAG  
AAAATCTTATGAGGCTGTTGATAAGAATGACACCGCAGCCCCACATCATCAGATGGAAAACGCACAAGAAAGCGA  
AAATAAATGAACACTGCAACAACAGCAAGCCTTATAAATAGTATAAATCGTGTGCAATCTAGGCCTTAAACGCTAAACTT  
GTAAGCTTTGGATGGAATAATGAGCTTGGTTGGCAATCAACGTAAATCAGCATTTTAATAATTTTATGTTTAAATTTCTA  
AG **CTGTTGTCCGTCCACTAAAGAA** GTTGCATAAATACAATGTACAATGGCAATTTTATTTTTTAAACGTGTAATAATGCA  
ATTTTCATCGTAATTAATATATTTTTTATACGTATATGTACGCCTAATGTCTAAATCTTAAACATAAGAAAGTCTTAAAAAT  
GGAAAATCCCATAAAAGCTATATATAAAATATTTTTTAAATCTTACAAAAAAAACGTAATGTAATGATTTCTCATATTG  
TGATAGATTTTATTGAAATTTTAGAAAGATGAAATGATATGCCTTTTGGTTGAAAAACAATGATATATATGACGAACGAG  
TCTGATGTCATGCATGATAATATTGCGTAGGAATGGGCTTCCACTCGGAGGATCAAGAACCAGAGAAAACCCCTCATGG  
TGTTTAGTTTTTATTACTGTGTATGTCCTTGTAAATGTGTATATTGTTGTATACATCCGATAAGCAATTCGTAAATCTAAT  
AAAGTCGTCATTTTTTTTTCATAACTC

**14. CG10217**

CCAGTGTAGTAAGGTCGCCCTTTGCCCATCATTGTTGTTAGTTCTGAGGACACCAAACACGCAATGCATTATTACCTGGC  
TGCTATCTGCCGTTGGTGGGCTTAATGGGCTCAGCCCTCGGTGAGTACAACCTGGTGCAGAAAGGACAACCTGCATCATTTCAA  
AGATCCTGCAGGGATCGTGGTCTCGTGGGAAACGGGCTGCCACGCTGACGGTGCATCGACGCCACCTCGATGTCCAGC  
CGAGGCTACTGCATCAACTACATGCGCCACAAGGGCGCAGTACTATTTGTCTTCAAGGAGCGATCCAAGGACTGCTA  
TCACTGTGTGTCAGGACATCATCCGACCCCTTAATGTGTTGAAAAGTTTGGGGCCCTGCTGGGCAACCCGCTGGAC  
AGGAACCCACCGTGGACTATGTGTGCTGTTGTTAAGGATGACCAGCAGTTGATAACGCTTTTAAACAGAGAACTTTGTG  
CCCATCAACTGCCGATCGTGCCTGGAGGGAGTGTGGCATTTTACGTACCAGAACCAGATTCCGATTCACGGGCGTATGCGA  
TAAGCCCGACGCTCGCATTAGTCCCTGTCAAACGGCAGGAACGCAGTTCCTCATCCAGAACCAGAAGTTCAACGTACCT  
ATCAGCAGTGCAGGGTATGGAGGGCACATTCACCGCACCGTGGAGTTTACGCTGCCTGGGCGATTGGTTTGTGGGCAAG  
AACCCTACTTTGCCGTTGGCCAACACAAAGGAGTGCAGTAAGGATGAGAAGTACCGCTGCTTCTTAAAGAATCGTGACGA  
TGATCTTTACGTGGGCGTTTCCATTACGGCCGAATGTAACACACTGAAGACGCCAGAAACGTACCGGAGCGTCAAAGC  
TGACGCCAGTGAAGGCTGAGTTTGTGGAACCCGGTTGCACGCTACCACAAAACCTTTAGCGGAGAATGGGTGAACACTGCC

AACATTGATGCCGATGTCTCGATCAGTGAGACCCACATAAACGAGACGTAATCCGGATAAAAGCTCGATAACCGAAAAGAC  
AATCTATGTTTGGCCGAGAGCGACGGGGTAATCGTGTGATGATGGCTCGCCTCACTGTGCGACGGTTGCCAGAAGGATTACG  
TGTGCTTTGACTTTATGCCCCGCCACCACAACATCATTGCTACCGCAAGGGTTGGCTGTGATCAAGGACGATTTTAGT  
ACAGTCTGCTCTTGGGTTCAGTTCCCAATTCCGAGGCATGGAATATGATCTGTTTCTTGTCTGAAATCCTGTGCCTGT  
TCGTTGCCCCGTTGCCGGAAAATCAACTTTACGCAGCGAGGAGAGCATCCCTTCAGAACGAGAATTCTTGGTGGTGTCA  
CTCTGAGTCCCGTCCCGATATCCATTGCAAGCAAAACATCTCGGATTTATCGGTTTGGCATACAGATCAAAAAGGAATTG  
CGGTGGATGAAAACATATTGCTTGTCTGGTGGATCACTTGGGTCTGCCGTTGATATCTACAGTGATCCCGATTACCGCAT  
GAAGTGCATTGGCTTTCGGAAGGAGAACCCTCAAGTCTACCTGATTACGTACGACGATTTGGATCCGCTGTCCAAGTATC  
GCTGCTGGGTCTATCAGCGTGCCGACCTCAACCGTGTCTCATGTGCGAGGCTGTGGGGCGATTCTGCAAACCTGGAGCAA  
GATGTGACCTCGTGGAAACCCTCGGAGGGCGCTGCCGTAGCCATCGATGCCGTGGAGTACGAAAGGGAGCGTGACGACTG  
TCCCATGCACCTCGATGACGGATTGAATCCTTGGAAAGCCGTCGGATGCCTCCAACATCATATTTGATTGGGACTTTTACC  
GAGCAGGAGCAGCGACACTAAAATTTCAACTGACTGGCCTCGTTATCGTGGTCTTAGTCCAGGTTAGGAGTTTATTAGCT  
TAAATAATCAAAAAGTATTTTTTAACTATTCCATCCAACGAAATTTACAAAAATTTTACAACCAACATAAAAGTCACTTTT  
AGGAGCAATTGCGTGCCTTAGAATGCGAATTTTAGAAAGTTTTAAGCAAATTTTAACTTAGTTTGTAAAGATCATCAAA  
TTTTTACGTGTAACAGCATTCGGTCCAAACGAATCTCAATGTATTGTGCAAATAATTAAGCAGTTAAATAAATGCC  
TTGAACT

**15. Ilp8**

CCGCTCGTGATTATCAGGTAACGTCGATCGGACGGACGGGTTAACCATTCAGCAAGTTAGCTCTGCAGCAAGTTTGCCCG  
CCAAAAGAAAACACGTATACGTAGTGTGTCAGCCAGAAAGGTGATCGACGTGCCTACTGATCTATTGATCTATTGAGAAT  
TGTGATCCTAGAACGCCACTAAAATGAGTTCAAAGTTGCATATGTGCCGCTGGATGCTGCTGGTTCATCGGAGTCTGTTGC  
CTGATGGGCAGCTCGTCCGGCAGCTTCTGCTCCCTGGAGCGGATGAAGAAGTTCCGGATGGAGGGCGTGGGAGCACCTCTT  
TCAGGCGGACGAGGGTGCCGCCGCGACAGAAGGTCCATCGAGTTCCGCGCACCACCATCTGAATCGACTTGGATCCGGCA  
AAACGCACAACAGCATCAGTACATCAGCCGAGCAGCTATCCAATGGTGGTCTACCTGAAGTGAACCCGGGAGCACCTTC  
AATCGCCTCAGCGAATCGACATCTTTCCGCGCTACAAGCCCATCAAGCCGACCACGAAAAGAAGCATCGCTTCAAGAG  
GGATCACTCGAGCAGGTCCATAACAACATTCCTACTGCTGTCTAAACCAGTGCAGGAGGAGTTCTTCTGCTAAGAGA  
GCTCCAGTGTCTGCTCCATGCCCCACGCTCCAAGTCCGGTCCATCTGGTCAGAAATCTTCTGAATCCGTTCCATAGTTATA  
GTTAGGCTATTTCATGTACATTCTACAAGTCCGCTCACTCTTATAGAGTACCTTATTTGTGCCCACTCCCAGGGACACAG  
ATCCATTTACAGTATTTATACACTTAGATCGATTTTGAATAAACAATCGAATACGGCAACTGATCGG

**16. CG4313**

GCGACTGCCTTCGGGCCACTTTTTGGGTGGGAACCATGTCCGGTGTATGGATGCGGAGAATTCAGTTTTAGTACAAATTC  
GGCGCAGGAACGAGCAACGCGTCTTTTGGCCGAACACAAAGTGCCGCGCGATGTTCCACCAAATCCGGACCAACTCCGC  
ATCCGATCTCGATAGCGCTGCCTCTTTCCGATCCCTATGCTACTGATCACATGGCGGATCAGGACGCGGTGTTGCCGGTA  
CCCCTTTCCGACAGCTTGGACCTGGACGTGGACCTCAATCTGAATATGAATCTTAATCTCAATGTAGACGACAG  
GCGCCAGGTGCTCTTCGAGGGCTATTCGGACGAGCTGCTGACCATCGCCTGGGTGGCCTGCATAGTGTTCATCATTGTGG  
GCGTTCCCGGAAATTTACTGACCATAGTGGCCCTGTGCGGAGGTCGTAACCCCGCAACTCCACGGCCATATTCATAATC  
AATTTGTCTGCTCGGATCTACTCTTTGGCTGCTTTAATCTGCCATTGGCCGCGTCCACTTTCAAGGAGCGGGCGTGGAC  
CCATAGTGATCTGCTGTGTCAGGTTGTTTCCGATGCTGCGCTACGGCTTGTGCGGGTGTCCCTGCTCTCCGTGTGCTGA  
TCACCATCAACCGGTACATCATTATCGCCCATCCCAGGCAGTATCCAAGAATTTACCAGCGACGATATTTGGCTTTGATG  
GTAGCCGGCACATGGATCACCACGTTTTCCATAATGATACCCACTGGCGGGCGTATGGGGTATCTTTGGCTTGGACGT  
CAGCATCGGCTCGTGTCCATCATGATGATCGGTATGGTAGATCCCCAAGGATTCCTCTTTCATCGCCGCTTCAATGG  
TGCCGTGCATCTGCATCGTATCTGTTATGCCGAATCTTCTGCTGGTGCAGAAAGGCGGCCATTCGCGCGGGAACCGCT  
GGCAAGACCAATGTCAGCGATGTGACTCCAGCTCCGCGCCGAGCATCAGATTCAAGCCATGGCCACACCAAAGAAGCC  
GGAGAAGGTGACCACGTCCAGCGGCGAGGCGAACGAACCGATCGCAGGACGACCCTTTGTGGTGGAGGAAAACCTTAGCGT  
ATATCGATGACAATGCTTCGACGGACAGTCTGCCGATCTCGTACAGCATAACGGAGGAGGGATCAGGACCAGCAGCCACCG  
CCTGTTGATGCCAATGTGGTGTCAAGGAGCGGGAGAAGGAAAGGGATCGGGATCAGGAAAAGGTGAGCCTGGGACGCAG  
TCAAACGCAACTAGAGATGGGCAAAACCCATGGAAAGAACCCTATCACTACATCCCTGCGCACCACCTCCTTACACGGT  
TTAGCCCGCGGAAATCCCCTACGCTCCATGGGCAATACCTCAAATGCATCCTCTATTTACCCGGGAAGGATGAGTGCC  
AAGGACCGGAGATTGCTTAAGATGATACTGGTAATCTTCGTGTGGTTTTGTAATTTGTTATTTGCCCATCACGGTGGCCAA  
AATATGGAAAAGCGCCACCAGGATGACTGGTTCAACATTGCTGGCTATCTACTTATCTACTTGACCACCTGCATCAACC  
CGTGTATCTACGTGTTGATGAGCTCCGAATACCGAAGAGCTTACTGGAATTTGCTGCGCTGCCATGGCTCTCCAGATACC  
CAGAAGCAGCGGAATCAGGCCAATGCAAAGCGAAAGCACCTGGAGTCCAATCGGCAGGTGAAGGCCACGACGTGACTCCG  
ACAGATGCCTTAACACC TTCATCGTCTCCGTCCTAGCGGATATGATATATGTGTGCCATATGGTAGTAATACGATGGG  
AGAAGTACCCAAATGTCATGTTGAATGATCTGCGGTAAGAAAAAATTCCTTGATCCCCTGGTATTATAGTGCCCTCCAAA  
AAAGATTTCTAGTCACATGATCCGGCCGGTCTGCCCTTCCACGCACACACGAAAACACAGATCACCCATATATATCTATA  
TCTATATCTATATAATGTAGGAACCTCAGAAGTATATTGCATTTTATACCAAATGACTTTAATATCTGGTTTACATTTGA  
ATCCATGTTTTAAGAACAATCGATGTTTGTAAATTTTGTTTTTTTTTCTTTGCTTGTGCTAATTAATTGTACCAATA  
CATAATAGATATATCTTATATGGATACGCCCTTCTATGCCCCAATAAATGCTTCGAATAAT

**17. CG6583**

TTTTATAGCATCTACCATATGGTACACAGTAACTCGCGTTATTTATTTTCTTGTTTTAAATCTATTTTATTTAAGTTA  
AACAAAGCGCACAAAACAGTTTTAAGTAAAAAATGAATGTCTGCTCCGTTGTACGTTCTGCTGCTCACCTGGCCATA  
TGTGGCAGCTGGGCCATTCGATGCTACCAGTGCTCCTCCGACCAGGATCGCAAGGGACACGACAGCTGTGGCGCCTACAA



GAGATTCAACCGCACCGAGCACATTTCCATTGAGTGCAACAGCGACGAGAGCCACATGCCAGGATCCTTCTGCATGAAGG  
TGGTGCAGCAGGGACCGAGAGGATTCATCTGGGACGGTCGTTGGCGCCAGGTGATCCGACGATGTGCATCCGTTTCCGAT  
ACCGGAGTGGTTGGCGTCTGTAACGGGGAGTCTACGAAAACGGAGTGTACTGGGAGGAGTGTACTGCTCCAGCGACAG  
CTGCAATGGTTCCAGCTTAGTTCAAATGCACGGATCCCTGCAGCTTCTGTTGGGACTCCTGTTGATTGGCGTTGCCTCCA  
GAATATTTAGAAGTTAATAGAAAACCGAGCTTATCCTCACCACAACGAAACACGCAATAAGTGCCTTTTCGCCACTCC  
ACATGATATCTAAGCTAGGATTGACTTTTGGATACAAAACACATTCGGTCCACCTTTTTCCTGCCTATAATTAAGTCGA  
AAAGTTGAAAACATTTTAAATCGTATAGGTACATTAGTTATCTACAATATCCAAACAAGAGGCAGGTAAATTTACAGACCA  
AACTAGCTAAAATATTTAAATGAAAAGTAACGTTAAACAATTGTAAATTTCCCTATGTCGCTTGTACTTTTTATATAGTT  
AACTTAATGAACATGTTTTCAAATGATTTTACTACATTTGATTTTTAAAAAATGACCATTCCGAAAATGCTTACGTTTG  
ACATATTTATTACTAGTATTTACCTGCCATATCCGAATAACCACTACCATATCGAAAACAGTAAATTTGTACACACAGA  
ATATGAAAATATATACTATATTAAGAGTATT

**18. CG7713**

ACGCACGCATGGCAACCCTATTGCTCAAGCCGTTGTTGTTTTCTAATTAAGCGATTATTATTTAAAAAAGCAACATGG  
TAGTGTGAGCTCCTGCTGGTCGCCATAATTTGGTCGGATAATGTCCGGACGGGAAGCTATGCCGTGGCCGGCTATACG  
GCTGCGCTATCCGCCGTAATGATCAGCTGATTTTCGTATATGCTAGCAGGCGGGGAGTCTGCGCAGCTCTATTCCCCGCT  
CTTTGAGACGGATATACGTTTCGTGATGCCCGTGGCAGGTGGCTTCTTTATCATCTACTTCCCTGCTAATCATCTGTCTT  
CCTATTTGGTCTACTACGGTATTAAGATCAGCACTCGAGGATGGCTGCTACCCTGGCTGGGTCTAATTGGACTAGCCATT  
CTCTCCAGTTTAGCTGGAGCCTTTGGCTTATTGGAGGCTACTATATTTATATCTATTGCTGGCTGGTGGTCTTCTCGCA  
GTACCAGATATTCCTGGAGATCCAGAATCCGAACATTGAGCTGCTCATGCCATGATGGAAGAACCCTCCATACAGAAGCTC  
GAATAATCTATTAGAATACTTTTTGACTTGACACGCAACAAGAATCCGTCATGCGCATTTTTTACAATAAGAATTCCA  
TACAATCCACAGATGCCCTACCAAATAGTTTTATATAAATTTATATATTTTACACACATTTATACACGATCAATTATACT  
TATGTGTAATTCGAATGCCTTAGTCTTCTAAACGACAATTAACAATAGATTTC

**19. pck**

CGAAGATCAACAAGCCTAAAGTAATAAATTTAATAAAAAAGCCCCACCTAGTTGTTGCTGCATTTTTTTGGGTGTGTGCGTT  
GTATTTGTTTACTGACAATCCCCAGAAAAGAACTCCTCTGCTCCAACCTGCGATCCCTCGAGACCCAGGACAGCAGCATG  
CGCGAACTTAACAAGCAGCAGTTCGAGGACACCACGGACTCGGGCGTCGAAAAGGGCGACTATCCGCGGGCCACCAATGG  
CGTGGTCTTCGGCGCCATAGTTACATTCGCCAGCTTTTTTCGTGCTGATGATGTCCTTTTGGCTCGCCGACTGGATCGAGT  
CCTACGAGGAGACGCGGGCCAGCTTCAAGAATGAGGCTGTGGCAGTACTGCTTTAAGGACTTCGTGTACCCCAAGTAC  
GCGTCTTGAAGCAGTTCACCGTTGCCACAACATCTTCTCGCACGTGAGTACAGCAAACCTGGCCGGTTCTTATCCTTGT  
CCTGATCTTCTCCACTCGTACAGGAGTATTACGTTATCCGTGAGTATCTGCTGCCCGCTGGCTCATGGCGGTGCAGGG  
CTTCGTGACCATGTCCTTCATCATCGTGTTCCTTGTGCTGGCCCTGCTCTCGCTTACCATCATCCGACTGCCTCTTAAGG  
CCGTTCTGCAGTACGAGTGGCTGCTCGTCCGCCTCTCCTACATGGGCACCGCCATCTCGTCTCTGTTTCATGTTTTTGGCC  
GTATGCATCTTCGGGGCTGCGCCTACCGCCGCGACTGGATGATGTACCCCAAGTTCAACGTGCTGGGCTGGTCTTACGC  
CCTGGCCGTTGTACCTTCATGCTCCTTGGTCTAGCCGCTCTGATCCTGCAGCGCGAGGCCCGGCAAGCCTACGACGCC  
GCGGCGAGCAGAAGAACCCTGGTAATGCAATGGAGATGCAGGAGCCGGGTTACCAGCCGCCGCGCCACCACAGCCAG  
TCGCGGAGCCTGCAGGGCTACATATAACAGCTGTCCGCCGACTTCCATACATTCGGTTCCGATTGGATCTTAGCTTAAG  
TTTTCAGACGCAATCTCGTGCCTCGAATCTGCGCAATCGACGCGCTCATAGTGCCTTTAACAATCGACCATATGTATCT  
ATATACAGCCGACTCAGCCGAGATCAGCTCGTATCCGTTTGTAAATGTATTAAATAGCACGTACAGCTAAACGTAAGAT  
CAGTGCAGCAAAAAGATCCACTAACTTTTTTACACATCTACCATTATACTTTTTATATAGGCTCAAAAATGTTTACAGCT  
TAAATTTTTAGACCATATTCACCTTTTTATAAGCAAACCTGGTGTAGAGACATATCAACATTGAATTAATGTATTATTTG

**20. kune**

CACACTTTAGGGCGTGTATTTTTCCAAGCCGACTTGTAAACGAAATTTTTATAGAAATAACAAATGGGTGCGTCCAACCG  
CATTTTTACAAGTTGCCCTTTGCGCGTCCGTGTTTTCCCTAATATGTTTTGTTATCGCGTTTTCCACGCCTTATTGGCTGG  
TTACAGACGGCAGATTACAAAACCCGCGATTACTAACCTAGGCCTTTGGGAAGTTGTTTCAACAACCTCCAGGACATA  
CACCGATTTTTTGACAATTCCTTTAACGGATGCCTATGGGTTTTCGAAGAGGAATATTACATCATAACGACTTCTCCT  
GCCTGGCTTCTACATATCCGTTCAACTTTTTGCTACGCTATGCTTTGTAATGTGCCTTGTGTTATAACCACTCACTGTAG  
CATTTCTTCGCACCTTCTCGCGATGATGACAGGTACATGGTGTCTCTGCTGGCGATAGGATCATGCCAGGTTGTGGGCTCT  
GTTTTCGGGTTTTATTGCTGTGGTCATTTTTGGCGCCAAAGGAGATTCTCGGGATTGGATGCCAGGATGGCAGAACAATGA  
TATGGGCTGGTCATTTGCTCTGGGCGTTGTTGGCGCTGTGCTGCTACTGCCGTCTGGCGTACTCTATCTAGTAGAAGCGC  
GTCGGGAAAGGTACAAGCGCTTAAACGAAATCAGCAATCGGGAGATCAGTGAATACGGAGATGAGTATTACCAGAATCAG  
GGACCTCCGCAGTGTTCGGACCGCTCCATCGCCATATCAATCCTATTTTGCATCTGAGCCAAGCCGACCAAGAAGACC  
CCAACAAGTAGTGCATCGAATTCGCTGTACAAGGAGGAATTCAAACAGATATATAAATCAAAAATGAATTCGAAGGAA  
TTA TCCGTCATTACACAATATTTAAATAAATTAACAATATACAAATATATACGATGTAAGGTAGAATAGTCATTCC  
ACTAAATCCACTACAAATGTTTTTAAATGTATCGAATTCGAAGGTAATAAATATTTGTCAAATAA

**21. crok**

TCGAACGCTGCTCACACGGTACACTGCTATTTACACGCCAAAAAATTTGAATCCAATTGAAACGCGAAGAAAAACATA  
AATATAACGATGAAAACACTGGAGAAATATATCCTATTTCGCCATCGTGCTCTGCTGCTGCAATTTGGCCAGGCGAT  
CAAATGTTGGGACTGTGCGAGCGATAACGATCCCAAATGCGGGGATCCTTTTTGACAACAGCACGCTGGCCATCACCGATT  
GCCAACAGGCGCCGGAGCTGGAGCATCTGAAGGGCGTGCAGCCGACAATGTGTGCGAAGATCCGGCAGAAGGTGCACGGT  
GAATGGCGCTACTTTTCGAGCTGCGCCTACATGGGCGAGCCGGGCATCGAGGGCGACGAACGCTTCTGCTGATGCGCAC

TGGCAGCTACAACATCTTCATGGAGTTCTGCACGTGCAACAGCAAGGACGGCTGCAACTCGGCGGGCATCCATAGGCTAG  
GACTGATGGGCGTCCCTAACTGGCACACTGCTCTCGGTGATTGTGGCTCATCTTCTGCGGCAATAGGTGGATCCACCTGCT  
TCAGCTGTAGCCAATGCCACGCCCATTTGCCACAAGGCTGATCAGATAGTATAAACTGTATTAGCATGCTTGTGTGT  
GTTCAACGTAGATATAAAAACTGAAGAATCTATAATTGTAACCGAGATATTTAGCAAATATTTTTAAATTTGTAAATT  
ACCTAATTAGCAGTAACTTACCTGACGCGCGAACAGTCTTGTGGTGAATGAGCGATGTGTAATCAAGTGCCTTTTCTGT  
AACGGACTCGTATTGTAACCTAAGCTGGAATACTATTTCCGTCAAAAAATATCTTACGCCTATGACATTCCATCTCGT  
AACTGAATCTTGTAACTTTCTATTTTCTACATTTATTTTGTAAATGTTTTTGCGAAAGATCGCCTAGTTTTAGTCGAC  
TTACAAGTTTTTATTGTAATGCGATGTCAAATAGAACATTTTTGAATAATTAACAAAAAACCGTTTATACAC

**22. cold**

TTGGTGTTCGAGAACGCGCTTCTTCTAATTTGTTGCTAATGTTTTTTTTGGGAGTGGTTTTGTTTGTAAATTTGACTTGT  
TTATTTACTTTGAGCTTATCGGCTCCGATTGCGTTAATTACTCCAGATATACGATGAAATCGTGGGAGATAGCTGTGGTG  
CTAGTCGCCGCTGTTTACTTGTGTTTCGCAAGTAAATTTCTGGCCGGTCTGGAGTGTCTATGTCTGCTCCAACCAGACGGG  
CAACACGGAGAAGTGCCTGAACACCATCAAGACCTGCGAGCCCTTTGAAAACGTCTGCGGAACGGAGATCCGCTGGGGAT  
CCCAGCCGTACTTCTCGGAGGGTGTCTTTAAGCAATACTACGTGTCCAAGAGGTGCATGACCAAGGAGCAGTCCAGTCC  
AAGAGGAAGCGCTATATGCAGCTGTACTGCACCCACATCTGGTACGAGGATTGGGCGTGCAACGAGTGTGCAAGGGAGA  
TCGGTGCACCTACTTTGTCTATTAGTGGCGCTCCTTCAAGACAAGGCTATGGTGTCTGTTTAAACCCTGCTCACCAGCTAT  
TAGGACTTGGATCTTGGCTCATTCACGCTCTTAGCCTCAAGAGCCTTTGCTATAACCAAGCACATTTTCGCTTTTTGTATT  
ATTTAAACGAAGCCGTCATAAGCTAAGTAGATTCCACACTCCATTTAAAACCTACACCGTCAAAGTGCCTTGACTCAGTT  
GGGAAGTAATGCCATTTACTATCCTGATGCCTTGCGAAGCGAAGTTTCTTTTCTAATACTTTACATTTTATTTGTAACAA  
AATTTGTTTCTCTGGATTCAAGTTTTTTAGATTTTTTACGTTTATGGGACAGTTTTTATACTCGTGCATCAATGACAACAA  
GAGCTATTTTATTGATTATTGCTTTATTTTGAATTTTGTGATGAATACGAATTGCATCCACGACATATCCTAGACAAATAT  
CTAAGAGAAAGCTCAAACATGAACATTAAGCTACATATAAGAATCAAAGAATGCCTTAAAAATAACAATCTGTTTCATA  
TCGAATCTCTCCACAATAAAGCAACTTTGACGTCTTTTTGGCGCTTTAATAT

**23. CG13088**

ACAGTATTTGTTTTGGTAATCTCGTTTTGAACAAAAATTTTCGATGTGAGATGGAGCAAATAAATGAAGATGTTTGGATA  
GATATACTAAAGTACCTACCAATGAGGGATCAGTTGTGCGTGGTCAAGTCAACGAGAATATATCGGCATACGTGAAGTA  
TCATTTGGAGTCATCTCAAACAGTGACTCTGACCCGCGAGGATCTGGATTTTCTGGATCGGAATAACAAGCTGATGCACG  
AATGCTGGGTGGTGGTTCGGCAACGGTGGAGCGTTTGAATTTGCAAAGTGCCAGCAGTGTCTGCTGAGAAAGTGGACG  
GAATACGACTTTCCACCCTCCGATCGCTGCATGCCACATGGACTACAATCTCGAGGAGGCGGACGAGGAAACCCCTCT  
GCTAACCGAGCTGTTCCCGCTCTTGACACGGCTGTCACTCAATAGCAGCACAAACAGGTCGTTACTTGTGGCACTGGAAGC  
AACAAGGGAGTTGAATCTCACCTGGTGTGAGTACCTGGACCAGACCACTTCGAGGAGATCTTTGGCAACCTACAGCTG  
ACCAAGCTGACTATGCTCTATTACGGATATAACGTGAACCTAGGCGAAAAAGTTGTGGACATAACGCGATGTACCACGCT  
TGAAGAGCTGCACATCGATGACCACCATTTGCTGGGTGATTTCTGCCCGACTGATGAATCTGCCGCACTTCCGCCGCT  
TGGCCTTTTACACGCGAGACTACTATGAGTATTTGCTAGGTTCCGGTGGCCAGGCACAAGCCGCTGAAGGTTCAATCGCTT  
CTCTTCAACGACTCTTTCTGGAGCAGTGAACGGGTGGCGGAAAGTACTGCACATGACCAATCTTCGTCGGCTGGTCT  
GCAGGAGGATGACATCGATGCGCAGCAGCTGCACACCATCTGCCACAAATGGCCAACTTGGAGGAGCTACACCTTTTGG  
CGATGCGAGAAGTCCGCTCTCCAGCCACCTGTGGAACCTATAGGTCAGTGCATCTTCTTAGGATTCTTAACTATCG  
TCTACCAAGCTGGTGGACCTCCGAAGCTCCTGCCTGACAAAAGTTCTGCTAAGTCGAGGATTCCACTGACCCTGCATCT  
CCACAACACTGGATTGGATCCTAGTAAAGTTCTACGGGATTTTGTAGTGCCTCCTTGAATACTCCTTTGAGCCGATCC  
ATTTGAATATTTGGAGTCCGCGATTTGTGGAATCGAATTCAGTCCAGACTCGTAGTAGTCATTTGAAAAGACTTAAATG  
ACATTTCTACCTCAATCCGTCGGTATACGAATATATATGTAGATGGAGATCCAAATGATATATCCTGAGTAAAATGTTG  
TACCTTTTGAAGGGTATAGAGTCAAATAGCTTAAACAAAACCAAAAATCTTTTATCTGTCTACCTACCAAAATCGTATT  
AAATTCAGAAAAAT

**24. Cont**

GCCCACAGTTCGTTGGCTTGCGCATATCTAATTGCTGGTTCGACTCAGCTTCTGGACTGTTTTGTTTTTATTTAATTAACCTA  
TAATTTAAAAAGCTGTAAATGCGCTCTGATACTTATTTTGTCCGGATCCGCACAACCTCGTGGTTTTTTTTTTTGTGAGCA  
GGAACACCTCGCAGTGGTAGCGTTTTCAACCGTTCGTGTGCTGCGTCTGGAGTCGTAATTAAGAACTATCGAATTCCA  
GAGCAAAATGTGCCTTTAGTCTGCTGCGAGACATCTAAACCAGAACCCACGCTATTTAAAGCTAAGGACCAACTATGCTAG  
CAAAAATCGGCTTCTGGCGAGTATTTCTGTGCTCAACTTAGTTGGCCAGATCAGCAGCAATTTTCCGAAAACCTGCGG  
GATCCGGATCCGCACTCGGGCAGCAGCCTCAGAATATCAGCCTAGCTACAACAAGGATTACTCTCCGCGATACAACCC  
CCTGTATACCTGGACAGCAAAGCGCTGACCCCAACCAGTTTCGACAATACGCTGGTTCGACGGACAGAGCCCTAATACCTACA  
AGGGGTACTATGATGGCAGGGCAGGAGGTGGGGCCCTTGGCGGCAATGTAGTCGGGCTGGAAACAACCTCGGCGGACTC  
GGCCACAGTACGACCCCTTTAATCGGAACAGCATAGGTTTCAGCAGGTGTGACTACCGGGACGCTTATACGGATGAAGA  
TAATTTTGGCCGGAGACTGGGTCTCGTTTCAGACAGACGTGCTATCGCTTCATCCGCTCGCCCAAGCGCAACTGGGCAG  
AGGCTAAAAAGATCTGCAAGGCACACAATGCCGACCTGATAAACGTGGATAATGTAGAGAAGCACTCGTTTACTCAAG  
AATCTCATCTGCAGAATCAACGGCAGAACCGATTCTTCATCTCCGCCCGGCAACGGGCCGTTGAATTTGGGTCAACGA  
TGACAACACCCAGTTAGTCCAGATCGAAGACTCCTTTTCCATGGACGAGCAAGTGCCTTTGAAAACGAAGATCTGCACG  
ACAATAGATTCCTTGTGCAAAACGACCTCAACAACCAAAATATCAATAATCAAATCAGTTTTACAACCTCTCTCCGGGG  
ACTGTTAATCAGCGCAATCAAATAACCTTCGCGGCTTTATAGGTTCCCAACCAGCCGATGGAGACAACCGATATGTGCG  
CGATCGGTTGTGTACGCCCTTCTCAAAGAAAAGGGATCGGTGGATGTTTCATGCCAGCCTATGAAATTTGAACCTAAATCTCT

TTATATGCGAGTCAAAGTACTATACAGCTCAGACAATGTCAACATAAAGTTAGACGACAAGCGTCCCTACCATTATGGA  
CTCGATATAAACGACATGGAACGGATTCCACGGGGTCCCTTATTTTCGTAAAGCAGCCAAACGACACGACTTTTCGATGTGAA  
CAAGAATCGCCTGATTAATGATGTTACTCTTAGCTGTTTGGCCAACGGGTATCCAACACCTTCATACACATGGTACCGAG  
AGGTATACGTAGACGACAGACTCGAGTACCAAAAGATTGATCCCCTGGCGCAGGATCGATAACCCATATCAGGAGGCAAC  
CTGATTAATCAGAGCCGAAGCAGCGTGGACCAGGGCGCGTATCATTGTGTGGCAGAAAACAAATTTGGGCGAATTCG  
ATCCGAAAAGCCGCATTTAAACTTCGGTTTCATTATGGAATTCATCTAAAACCGTCTGGCGGAGACAAGCGAGATGAATT  
GGGCAAATCCATATTCGTGACCCCGCAGCACTATCCCAGCTATCGTATTACTGGGCTCGAGACTATTTTCCCTAAC  
TTCGTGGAGGAAGATCAACGCGTATTCGTCTCCCGCGATGGTGCCCTATACTTCTCCTTCATAGAAACTGTGGACAGAGC  
CAACTACTCGTGCACCGTACAGACCCTTGTGTGCGACACCGGTGCGAACCGGACCCCTTCTTTCCGTTGCGCGTTACCCCCA  
ACAGCAACTATCAAGCACTGATATTTGCCAACACCTTCCCTAAAGTCTTTCCGGAGGCGCCAGTGGCAGGTGACGAGATT  
CGGCTGGAGTGCATGGCCTTCGGTTACCCCATTCCTGCATACAATTGGACCCGCCAAGGCCTACCTCTCCAACGCAACGC  
CTACACGATCAACTATGGGCGTGTCTTAATAATCCAAAATGCGACAACGAACGACAACGGCGAGTACTCCTGCACGATTA  
CCAATCCCCGGAAGACACTTATGAAGAGCATATACATCAATATTCAAATGCGCCACAATTTACCATACTCTTAAAGAC  
ATGATAAAAGACTACAACAGTGACGTGACTTTTCAATTTGCGAGGCATTTGCAATTCGGACGCGAATTACACGTGGTACAA  
AAATGCCGAACGACTCGACCCAGCGAATATTAATCGCGACCAGTACATTATCCAAGACAATGTGTTAACCATTAATTTTC  
TAGAAAAGGATAAAGACGACGCAATGTACCAATGTGGTGCCAAAACCAACTGAAGACCTCCTTCTCTTCGGCGCAGCTC  
CGAGTGC'TGT'ATGAAACCGTCC'TTTAAAAAGCATCCCTTGAATCTGAAGTCTATGCTGTTTACAACGGCAATACGAC  
AATTGTGTGCGACCCGGAAGCCGCTCCACGCCCTAAGTTTTCAATGGAAGAAGGATGGACAGGTGATTGGCTCGGGAGGCC  
ACCGGCGCATTC'TGCCAGTGGTACCC'TGACAATATCACCCACGTGCGGGGACGATGAGGGCATT'TACACATGTATTGCA  
TCAAACCAAGCCGGCACCGACGAATCGCACGCGCGTGTATTGTATTGCAGGAAATTCGTTTCATTGAAACGCCTCCACA  
ACGAATCGTTTCTAAGGAACAGACTTAATCTTCTTGCATTGCGAGGCGCCTTTGATGAACTCCTCGACATTGCTTATG  
TTTGGAAACACAACGGCGAAGTCTAAAAACAATCACGACGGCACCGGACGCATTATTGTAGATTGGAACAGATTGACA  
GTGCATAACACGAGCATGCGCGATGCCGGGGACTACGAATGCGTGTGTCAAGTCCGGCGGTAACGAAATTAGCAGCAAGAC  
CAGTGT'TTCTAT'TAGGGAGCTCCTGGCGCTCCTGGTGTGTTCAAGTCAATACAGATAAGATAAGTAAACGAAGGCCATATTG  
AGTGGTTCGACGGATCGCAACCGTTCGTGCGATCCGCTACTCAAGTCACTAGGCCGTACAAACTGGAATCGCACCTGG  
GTTAATGTGTGACCCATGTGCAGGCGCGAGAAGTAGATCGATACACCTCTCGCCAGCAAGCCGAGGTTGTCAATCTGAC  
GCCGTGGTTCGGCTTACGAATTTAGTGTACTGTGTAACGATCTGGGAATCGGAACGCCCTCGGCCCCCTCGCCAATTT  
ACAGCACCTATGAGGACAAACCATAACATAGCCCCGAGGAACGTGGGTGGTGGAGGTGGAAAGATTGGCGACCTAACTATC  
ACCTGGGATCCGCTTCTACCGCAAGAGCAGCATAGCCACGGCATACTATAAAGTGT'TTTGGAAAGCTCAAGGGAGCCAT  
TGAATGGGCATCTGACGAAATAAAAAACAGGATCACATGGGCGTGGCTGTGGTTAATATTCTCTTAATAACTACTATA  
CGGAGTACGAAGTCAAAGTCAAAGCCATTAACAGTGTGGCAAGGGACCGGAGAGTGAATAGCTGTACATACTCCGCT  
GAGGACATGCCACAGGTGGCTCCTCAAAGCCATTGCGCTCGCCTACAACCTCCACATGCTTTAATGTCACTTGGCAACC  
TATAGACATGTCCCGTGAACATTCGTGGCAAACCTCATTGGCCACAGGTTGAAGTATTGGAAAACGACGCACCAGGAAG  
AAGACTCGGTATAC'TACCTGTCACGTACTACAAGGAATGGGCGCTTATCGTAGGTCTACAACCAGATACTTACTACTTT  
GTTAAAGTCATGGCTTACAATGCTGCAGGTGAAGGACCTGAAAGCGAACGCTTTGAAGAACGAACATATAGAAAGGCCCC  
GCAAAGCCGCCATCTTCGGTTCACGTGTATGGAATAAACCCGTCTACCGTGCGGGTTGTTTGGAGATATGTTTACCTT  
CGCAAGACGAGGAACCAGTAGAGGGTTATAAGGTTTCGCATTTGGGAATCGGACCAGAACATGATTACGGCCAACAATACC  
ATAGTGCCAATCGGACAGAACTGGAGTCGTACATCAACAATCTGACGCCAGGGAAGAGTTACAACATGCGAGTCTCTGC  
ATACAGCAATGGAGGAGACGGTTCGCATGTCCAGTCCAACCTTACACTCCAGATGGGCAAGACCACGGCAACCGGCGAA  
ATACCCGACATGCCCACAATATCAATACGGCTTATCTTAAGCACATTGCTACTCTACTAGCACCTTTCTTTACACAAGC  
CAATGAATGCAGCAAAATTAAGATCCATAACTTTAGGCGTAAGAACATACATATACTAAGAAGTGACCTTATATTTGA  
GTAAGTGAAGTTATAAAAAGAACTACATTCATCCGTGCTCTCTTGCAAGCCCTTAATTGATACAAATGCAAT **TCCGTC**  
**CATTTTATAGACTTTTAT**CAAAAAATAATTTCTAAAATTTTATCAACAAAATAAATATGAATACCATTATATGGTCCAGT  
ATGTTGCTGAACTAAAAATAAC

**25. mth15**

ATTCGCTTTTTGTGCTGCTTCGAATCGGTTGATGTTGCTTCTTCAATTTTTATTTTCGTTTTGAATACTGTTTAAAGAGG  
AAGTAAAGCGCGCATTTGTTTATTAACCGAATACGAGTCTGAAACCCAGACGAAAGTGCCTTTGTGGGTGTGTTGATACAA  
AAAAAGTGTGCGCTTACTTGAGTTCGGCATGCAAGTCATGATCTTGCTCACAGCCGGCACCTTGATGACGCATTTCT  
TAGCAAGCGCAGATCCACATAAACACCAACGACAACCTGCCTTTTACCTGTGTATTGTATTTGTATCTGTGTCTGTGTTAC  
TAAGCAAAAGATGCTCGTAAAAACGCTTGGCGCGCATTTTGCAGCCGGGCAAAATGCAAAAAAATGCAGCTGCTGCGCTC  
TGCTGATTTCCCTGCTCTGCGTATTACTTCTTAGTCTAAACCCTTTACCAGTAACCAGTCATGTCACTAGCGCCGGATCA  
TCAACAGCCCTATCTTCCGATCCCAACCTAGTGTGGTCAACAAATGTTGCGAGAAGTTTCGAGATACACGTGGACCATGA  
GTGTCAGCAGGTCAATGAAACGGACTACTTCCAGCCGATGTTACCAGCTATGGAGGAGAGCAAAAACAGGCCCGTTAAGT  
TCAAATTCGTATCGGGATTCCAAATGTGGATCCATGCAGATGTGGCCAATATACCACTATGCTGGCAGCTCTGATAAG  
CTAGTGTACTGGATGATGGGAGGCTAAGGCATTACACCAATGCCGAAAACGAAGCAGAGGAGCGTCATGGAATACAATC  
GGATTATGAGGAGGATATGCCGGCAGTCTGGAACCGCTATACCTACTGACTAGTAAAGGATTTGATTTGATGACAAGG  
CCACTCCAGTACGGAGGAAATGTGCTATTCGCCAACATTTGCTTGGCCCGCAAGGAGATCAAGTGGAGTACTCA  
AATTTCTGCTCCGCAAAATCTTAAACCCAAATTTCCATGGCATCTCGTTGTTATCCTGCTGGTTCATCGCCATCATCTA  
TTTTATAC'TTCC'TACTCTCAGAGATCTGGTTGGTAAACATTGTGACAACGATAGCCATGTGCCTTATGGTAAAGCCAGGCAG  
CAGACCTTGTGCAATTTTACCAGCTGACCAGCCATGTGAGCTTCAATGTGGCGGACATTATCCTGTGCTTACGCCCTC  
TTGGCAGCTTTCTTCTGGCTGAACAGTTTTCGGTTTTTACATTTGGAAGACCTTTTCGTTTCGAGGAACGTCTTCTGCGAGT  
CACGGACGGCAGGAAGTACTGCTATTATCTGCGTATGCTTGGGGATGCACAGCAACGATGGCTGCACTGGCTGTCTTCG  
CACATTTCTTCTCGACGCCAATCTTACAACAGGAGCACATGGTGGGCGAGCAAGAGACGATCGGCTGGCTAGGCATA

TGCATATTCCTTTGCTCCAATTGCTTGTACCATTTTGGTAAACATATTTCTTCTATGTGACCACCAGGAAGTTGATTAACCG  
CAGGACGGTATACGGCCGCATTTGCGCACAAATTGAAAGCCAATTTTATCATGTTCTCGCTGATGCTGTTAGTAATGTCTA  
TAGCCTGGCTATTCCTCATAATGTCCTGGTTGCAGATGGAAGGCCTGCTTTACGCCACATCGTAGTTAACGCCCTGCAG  
ACGCCGCTGTTGCTATACATATGCGTGTGCGCCAGCGACATGTGACATTTCTGCTGAAAAAGACCTGCTGCTACAATGA  
GCCACCGTCGGCAAACGACTGGGGCGATGAGCTGCATTATATGAACGGCAACGATTACTGAGGAG **CCA****CGGTCC****ACTA**  
**ATATAAGT**GTTTTTCGTAGTTTAGCAATGTCCAACATTGAGATTTGTACTTAATTTTAACTAATTTATGCTGTACGAGATA  
GTTATTAATGAGAAGTCTGACACCT

**26. CG8010**

GCCAGTGCCAGTGCAGCCAGGGCTGCATCGCCATCAAGAACATCTGTGGCAGAACAATAAAAAAAGGAAAAATACTCGC  
TGTGTATTTTCGGAATTTAATTTGGCAACTTCCCCCTCCGAATTCAGCGACTTGGCCTGCTCGCACCGCCTGGACACCT  
GCTACTGCAGTGTCTCGCAAC**ATGGACCACCACACGTACGCCAAGAGCGGATCCAAGAAGTGGTCCGCGGAAGAGAAGCGC**  
**AACCTGGTGGTGCAGCGGATCGCGGCGGACGAGCTCTTCTCCGCTACTCACCGAAGCACGCGGAGCCATGGAAAAAATT**  
**CAAGGAAATGGCCAAGATCGGCGATTTAGCGAGATTGCGCTACGCAAGCAGTGGTTCTCCATGGTGCAGCGGTACCGCA**  
**TCCACAAGGCCAACACACTGGGGCTCCCACTCAACAAGCAGAGCATCGAGGAGCTGAACAAGGAATGGGAGTTTTTCGGC**  
**CTCATCCACGCCACATGAACCAGAAGACCGCCGACCTGCACTCGTACGCGCTCAAGGAGCCGAATGTGGAGCAGCCGAA**  
**CAATAACCTGGCCATCGCCAGTGTCTACTCCTGCGACGAGGCGCAACTCTCGCCACTCATGCTGGGCGTGTCAATGACC**  
**ACAACCTTGGCGAACGCTCGCCGCCAACCGGATGCGACACCGATGACATGGACGAGTCCAACACGTGCGCCCTGCCACGGG**  
**AACAGTGGCCACAGCAACAACGATGAGCTGGACAGGCTGCTGGCCGAGGCGACGGCGCGCAAGGATGCGGCAGTTGGCGA**  
**CGGCGAGGATGTGTGCATGCTGAGCAACACCAACTGCCACGAAATGGAATGCGGCCCGGTGATGATTGGCGGCGAGGTGT**  
**CGCTATCCAACAGCAGATAACAACGACTTCGAGGAGGCGACAGTGCACGGAACCGGCTGTGAAGAGCGAGAAGCCGGAG**  
**AAGCCTATCCCGAAGGCGCGTAAATTTGTTAAGGAAACACCATCGCAAAGGTCTCAGCGAAAAGGAGAAGTATTACAGGCA**  
**CCGCCGTCGCTACGAGCAGCGAATGGAGAAGCGTCTGATGGGACTGTGCACCGTGGTGGGACAACCTGCTGAAGCAGTTTG**  
**CTCCCGACATGGATGCTCCAGCCTGTTGGCCCTGGGCAGCGATGTGACGCTCAGCTCGCCAGCCGCAAGCAGCAGTGC**  
**GAGGAGGAGGAGGAGGTTCTGGAGGAGACGGAGGAGATCAAGAGCTCCAGCAGGAGCAGCAGCAGATGCAGCTGGAGCT**  
**GGAGCAACAGAAGCTGGGAGTGCAGGCGGATGCCATGACACTCAGAGTCTGAGCGAACGCATCCGAGTGCTTCTCTGGTC**  
**GGTCGCCTGCTTGTTCAGGGTTCAAGTGAAGTTTCTAGCTGTGTTGCTTACAATCAACAAACAAAATATCGTGTGGG**  
**CTCTCAAATGACTCCCACCACTGCGCTTCGTGCT**ATTACGGGACAA****CGGTCCA****CAGT**GATTTTTCCGCTAAAGAATAGG**  
**GCGTGCACAGCGCCGATAGATAGACACGTACGTTTCGTTTCAGTGATAACGAAAGCATAATACGTTAATCGAAAGAACGAA**  
**TGTAAACGCATTAGATAAACCAGAAAGCAAACC**

**27. ND-B16.6**

ACTACTTGGTATTTTACCCTGCCCAAGTCAGGCCACACTGCCTTGGTGTATGCAAAAAACGTCATTTTTTTGACAATT  
CAACAGATTTTTTCCCTTTATTCGAGCGAGGAGTCA**CCATGGCGACGGCAGTGCCCGATTGTC****CCCCGAAACAGGACCTT**  
**CCACCGCCGGGCGGCTACAAGAAGATACCCTTTGCCCGCTGCCACCGAAGAGCTACTTCACAGGCTTCACCACCATCGG**  
**CACCTATGTGGTGTGACAGCCGTTGGCCTGGGCATCTACTACTTGACCGCCAAGAAGGTGAAGCGCGACGAGATCGAGA**  
**TGCGTTCGCGCCAGAATGTCATCTTTCCATTTTTGGTTCGCGAGCGGGATCGCGAATTCCTGCGCCAGTTGCGACGCAAT**  
**CGGGACGAGGAGGCGGAGCTGATGAAGAAGTGCCTGGGCTGGGAGGTGGGCACCTGGTATGGTGAAGCCGTTTTCAAGAC**  
**CTGCCCCGAGGATACCTGGTACGCCCATTTTCAAGGAGTCTACGCCCACTCCGACTGGAAGTGCATCGCCAAGCGTG**  
**CCCCTTGAAGCTCTGGTCTAAATCGGCCTAGTTAATGGATTAGTTAATGCCTAAGCACGCACCTTTTTGTTTGTAGAT**  
**CATCCGCCTAAGCGCCAAAAAAGAAAGTATCGACCAATATAATGTCAGATCAGATGGCTGAAATACCGATTCTCTTT**  
**GTGTGTGTTTAAATCCAAATCCTGTGCTGGACCACCCAGGTAGCCAGAGATTTTTTACCAA**CCGGGGCGTTG****CGGTCCA****  
**CGTCAATATAGCCACGGGCGAGTGTCAAAAAATGGCCAAATTAGATGGATTTGGTGGCACCAACAGCGGGGAATCCAG**  
**TTGGCTGTGTACCAAATTTAAATCTAATTGAAAATCTGCTGCTTAGTAAAAATAATAAATTCACAACATAAAAAA**

**28. Socs36E**

AGTCACACTGGAGAAACGGAACGAAGCGGACGCGAGTGCGAACGATACAGATACTTTTCGGGGAAGCGATACTTCTTCGGA  
TTCGTGCGTGGTTTTCGTTGCGTCGAGTGAAATTGCACAAATTAGTGGAAGTGCACACTGTGCAATGGAAATAGTGCAGTG  
CCATCGCAGATCGAAAAGTGCAATCAATTAGTGTGTTGCTAGTGTGAGTGTGTATGTGCCAGCCAAACGGTTGAGATAACG  
TGAAAACGGGGAAAATATCTTTCAAAGCAAACTAAAATATGCTTAACTACGGTTTAGCCAAATTTGCCAACTAGCCAAA  
AGTAACGAGCACACCGAAACCAAAAAAAAAAGCCAGCAACCAAAATAGAGAAAACAATCGGAGGTCCACGCCAACTAGG  
ACTCTGCCCCACCTCGAGCTCCA**ATGGGT****CATCACCTTAGCAAGTCTCAGCACGCGCCAATAGCCAGGAAAAGAGAAA**  
**TCCTACCGCCAGCTCGAGCCCCAGGGAAGCAGCAGCACTAGTAGAGACGATCAGCCTGGACGAGGAGGAGCTGCAGGTGG**  
**AAGAGATCCTCACAGAGGCCACTGTCTCAGCCGCCACATCGCCGGCGGAAGTGCCTCAGATCATCATCAAATCCAGCTG**  
**GCCAAAATGGAGAACGGCAATCCGGTGGCCGCTGGTTCAGGTGGAAGTTTTCGCCGAGGTGGTGGAAACAGGAGGAGGAGCA**  
**GCAGCGGCAATGCGCAGATGGTGCACCGACGACGACGCGCCGCTGTCTGCGGATTGCTGAAATGCAAAATGGGCAGA**  
**TTGTGAATGTGACGCTGGAGGGCGGCTACGGCGAGGTGGGCGTGGTGCAAAATCGAACTGCTGGCAGTTTCGCCGGAAGCG**  
**GCCAAAACCGAACGACAGCCGTTGAATAACAACGGTTTTAGCGGGAAGCGTCCGGCGTGCAGATAAGTACGTTACAACCTGCA**  
**CGACAACCATGGCGGCAACGCCAACTGCCCTTGGAAAGCCGACGACGATGACGACCTGGATGAGTGCCTGTTGCGTCCGGC**  
**GTCGCAGCAACAGCAACAGCCGACGCAACATCCACCACCACCACCACCAGCAGCAGCAGCAGCAGCAGCAGCAGCAGCAG**  
**GCCGAAGTCGTCGAGTATGCGAAGTGTGAGTGCCTGAGTGCCTGCAATATGTTGTCGGCGGGAACGCCAACACAGCAG**  
**CAAGCCAGTGGGCAAAAGTCGGAGTGTGAGAGCGGACCACTCTTCTCAATTTGGAAAGTGCACAGCGGAAAATCCG**  
**CAGATTTTTTTTTTTAACGAATCAAACATATAA****TAAGTGAATAATTTAAATCCAATTTGTCAGCAATTAAGATTCA**  
**GTTGTGTGATTTCAAAAATTTAACCAAGTGTGAAATCCAATCAAGTAGTGACATCATGAACTTTTTAAATTTCCAGAAG**

CAATAATAGCAACAGTTGCTGCCGAGTCCGAGCAGTAAAGCACTTTCAATGGGAGCAGCAACATCCTCCGCCTCCGGAT  
CCGCATCCACATCCGTGTCCACATCCACATCCTCGAAGCGACGATGCTGCAAGTGCAAGTGCCGCGACGCCATCCGAGGA  
TTAAGGGATATGCTGCCGAGCAGCAGCAGTTCCGTGAGCAATAAAAAGGATGCCGCTGCGGTGGTGGCGATGGTTCCGAG  
GAAATCCCGGACAGCTGACCGCCGCTCCACACCGCCACGCTGGGCACATCGAGTGGTGGCTCACAGCGCCGGATGCAGA  
GCCAAAGGATACGAAATCCGTGCGGTTCCGGACGCCAGCCATCACCATCATCAGCTCATCATTCCGATCACATCGCCG  
GGCTTCGTGGTTCGAGTCCGCAATGGCGGCCGCTAACTGTGTCCAGCAGCCGCCCCCAGTCCGCCCCAGACTCCGCC  
CCGGCCAGTCCCTGGCCACGGTCCGCCCCCGCCGAGGGGTGCCATGCCGAATCGGAGCCCGCCCAACATGACCG  
TGCACCTCGCAATCGACTTCATGCACTGCCTGGTTCCCGATCTCGAGAAGATCACGAACAGCAGCTTCTACTGGGGCAAG  
ATGGACCGCTACGAGGCGGAGCACCTGCTCGAGGGCAAGCCGGAGGGCACGTTTCTGCTGCGCGACTCCGCCAGGAGGA  
GTTCTCTTCTCGGTACATTCCGGAAGTACGGCAGGTCACTGCACGCTCGCATCGAGCAGAGCGGTACACAAGTTTCCGCT  
TCGACTGCCACGATCCGTGTGTGTTACGGCGCCACGGTGCAGGACTTTTGGAGCACTACAAGGACCCCGCTGCGTG  
ATGTTCTTCGAGCCCTGCCTGACGATACCCCTGCACAGAAGGCAGACCTTCTCCCTGCAGCAGCTTCCCGGGCGACCAT  
TGTGTCCAACACCAGCTACGACGGGATCAACCAGATGGAGCTGCCCGGTGCGCTGAAGAGCTACCTTAAGGAGTATCACT  
ACAAGCAGAAGCTGCGCGTCAAGCCCATCGACCAGAACACCCCGATGCCGTAACGGCAATGTATAGCGGGAGGAGCAG  
CAGGTGGGCTTACCTACTACGAGGACGTGGAGAGCGGCAGCGAGGTGGACGAGGACGACGACGAGGGGGTCAACATACG  
GGTCTCCTACGTTTACGACGCGGAGGTGGTGGCCAGCTGCAGCAGGTACCACGGCGTCCGGC **CCATCGGC** **TCCGTCT**  
**CATCCAG**ATCGTCCAATCTTCAGGAGCACCTCAGCAGGCTGCCAACCCGCATGGCAGCCGCTTTGGTCCGGATGTCCGCC  
AATCTGAATTGCTACCAGAAGACTGTCGCCACGCCGGAGCGTCACTCCAATCCTCCTGAGGATCAGGACGTGGACGGAG  
GGGCAAACAGAACCAGAAACAAAACCTCAAACCTGAGACAATCCAGTGCAGCGTGTGCCGCCACCATAAGTTAAAAGAT  
CAAACGCGAAGCCACATAACAAAATCGCTAGCTCGCTACTACAAGACTGTTCATGGATCAAAAACCAAATGTTACCATAT  
ATATCTCACCTATTGGAATGCAGCTCGGACGGATTTTGTAGTTGTGGCACTCTTGAAAGCGAGCTGGTAGAATGTAGAAT  
CGAAATCGCAGTTAGCTAATGTACTATAAACTAAGTATTATTATCTAAAGCAACCCCTCTCTCTACACACATAAGTATT  
GCAAAAAGAAGGGCAAATCGAGCTTTTCGTAATCGCTGGTATTCTTGTAATATTTTATTGTATTTTGAAGTATGGAA  
TCTAAATGATGTGTACTGTACGTGTAATAACGAGTACGAATGCAGCTTAGTTAGTGTAAAACCTCTCTCATTAGCCAA  
ATTTCCAAATGTAATTTTCGCCCTATTTATGAATATACTTTATTTATTTTTCGAAGTATTTTCGTTCCGAAGCGAGTGT  
TTGTTTAAAAAGAAAAACCCGTCAGTTGTACACGTGTAGAGCATTGTAAATACTACCGATTTTTCGATTAAGCTGTAG  
CTATATTAATATAATGAATTATAAATCATGTATTCTACCTAGGTGGTTGCTGTTATTTCGTAACATTTCAATAAGCAGTT  
GTTTCCAATACCTATTTAATGTATTTTACATATCTCACATGTTGATGAGCATGCGTATCAATATTTCAAAAACAAAATCGA  
AAAAAGAGTCAAACAATAAAGTTGATCAAGATATTAG

## 29. Atet

TCAGTTCGCATTCAGTTCTTCGTGCTTCCGCGCTGCCTGAATGTTGTTGCCTTCTGCGGTGCGAGCGGGATTTTCGTTTTTCG  
GCCAGGAATCGAGTCCAATCGCAACGGATCGCATCGCGGTGAATAAAAACACGTTTTCGCTTAGGCAAAAGATACACTTTT  
GCGTATTCCTGGAGTGCCTCGCTTACCATCTGGTAATGGTATTTTCGATTCTGTTCTCTCACTCCCGTTCGAATCGTCGAA  
TTGTGGCGCATTTAAATAGCTGGCGTTGTTTGTGTTGTTGTTGCTGGCTGCCGCGACCATAACACAGAATACAACAAAG  
AAGCCAAAGGCACGAGCAGGATATCTCGCTGTCTCAGTATCTTCTGAAAGTATCTAATGTGCGCGGGAGCGGTACAGTG  
AATACGGTCTCTTTCGGCAGCGGCCGAAAAAATAAATAATGCTAATAAACCAAAAACACGTTTTTATGCCATTTGT  
GTTTTGCTCTTTCGGAAATAGGCCCATCTTAATAGAAATCCAAAGAGCTGAAAGCTGAGTGGTACAATCAACATATAA  
CGTTTACTTCCAATGCAGATGCCAATCGCCAGCGTATTCAATTAATAACAGCATTCAAGATCCGCAAAATACGTATCACA  
AAAAATATAAAGCATTAATCAATTGAGCCAAATGCTGATGCCATATGCCAAAAGCGATTGCAACAAAAACTAAACGCAT  
TCTCAACTAGAATAACAGAACTAGCGTCA**TGAATGAGCTGCAGGCCTCCAGTGTCCCGCTGGTGGACAAGTGTCTCT**  
**CCCACGCGTCACTCCGCGCGGCCAAGAGTCCCAACAGAGTCTCCGATTCCGGCAGCCACTACGGCACCTAATGCCGTT**  
**CTCTACACAAGCGGGAACATGTCCCTATCAACGCTCTCCACGGGCAGCGGCAATCCAAATCCAAATCCGAATGCGAGTAC**  
**CAATTCAGACAGTGGCCAGTGCCTGCTCAGCCAATGAAGCTGACCAACGATCTGAAGCAGAACAGTACCGGTTCC**  
**AGAACAACCTGTGCAATGGCGGCTTGGGCAGTAAACACTGCCTTAGCCCCCAAGGTGGCCAAACAACAGCGGTGGTAGT**  
**CCGAATGGCCAGAAGAAGGTACCATCGCCTTGTCCCATCTGCCCAACGGCCGCGGTGGACATCGAGTTCTGTGATAT**  
**ATCCTACTCAGTTACCAGATAGTCATCGGCGCGGATTCAAGACCATCCTGAAGAGCGTCTCGGGCAAGTTCCGGAATGGAG**  
**AGATCACAGCTATCATGGGACCCCTCAGGAGCCGGAAGAGTACGCTGATGAACATCCTGGCGGGCTACAAAACCTGCCCAA**  
**CTCAGCGGCTCCGTACTAATCAACAGCAAGGAGCGAAATCTGCGGCGCTTCCGCAAGCTCTCCTGCTACATCATGCAGGA**  
**CGATGTTCTGATCGCCAATCTGACTGTTTCGCGAGGCCATGATGGTGGCCGCAACCTCAAGCTGGGCAAGAATATGATCA**  
**GCTACGCCAAGGTGGTGGTGGTTCGAGGAGATCCTCGAGACAATTGGCCTCAAGGAGTCCGTGAACACGCTGACCTGCAAT**  
**CTGTCCGGTGGCCAAAGGAAGCGACTGTCCATTGCCCTCGAATTGGTCAACAATCCACCAGTGTGTTCTTCGACGAACC**  
**CACCTCCGGACTGGACAGCTCCACCTGCTTCCAGCTGATATCGCTGCTAAGATCGTTGGCCAGAGGAGGCCGACCATAG**  
**TGTGTACAATCCATCAGCCGTGGCGCGTCTCTTCGAGAAGTTTCGATCATCTGTATCTGCTGGCCAGGGCCAGTGCCTT**  
**TACGAGGGCAGAGTGAAGGGATTGGTGCCTACCTATCATCACTGGGCTACGAATGCCCTCATATCACAATCCTGCTGA**  
**CTATGCTCTGGAGGTGGCGTCCGGGGAGTACGGCGATGCTGTACCCAAGCTGGTGGATGCGGTGAAGAGTGGGGCTTGA**  
**AGAAGTACGCGCACAAAGGATTATGTACTGACGTTGGCCAAAAGGGCTGCAACAATGACATTATCAAGGGCAGTGGCAGC**  
**GGAGCGGAGAAATGCAATGGCCATTTTACCCTGGAGGATGAGAAACCCCGCTGGAGGACAGACAGCTGGAGCCCTCTAT**  
**TCCCGTCGATGATCTGCGGAGCTAAAACACCGAAGCTGGAGACGCAGCAGTCCGAGAACTCCGATTGCAGCGTGGTCA**  
**ATATGCCGACTAATGCCGTGGACGACAGTTGCAGCTTTAGCTCCTCGAAGGGCACACAAAATGCTGTAGGTGGTTCCGGA**  
**TCGGGAGGACCCAGTCCGCTTGTGGCTGCATGACCTCGCTGGATTCCGACGAGAGCGTGGTACATTTGCCCAACAA**  
**GACGGGATTTCCACCAGCGGCTGGACACAATTTGGATCCTGCTCAAACGCTCATTCCGACCATTCTGCGGATAAAA**  
**TGCTGACCCACATGCGACTCTTCTCGCACGTGATCGTTGGAGCCATCATTGGGATGATCTACTACGATGTGGGCAACGAG**  
**GCCAGCAAGATCATGAGCAATGCCGGATGCATCTTCTTCGTTTTCCCTGTTTACCACCTTACGGCCATGATGCCACCAT**

TCTGACCTTTCCACCGAAATGTCAGTGTTCGTGAGGGAGCATCTCAACTACTGGTACTCCTTGAAGGCCTTCTACTTTG  
CCAAGACCATAGCGGACATGCCATTTTCAGATTGTCTTCTCCAGCGTCTATGTCTGGTGGTGTACTACCTAACCTCACAG  
CCAATGGAATTGGAGCGGGTCTCGATGTTTCGTGCTGATCTGTGTGCTAAACTCACTGGTGGCACAATCGCTGGGACTGCT  
GATCGGGGCGGGGATGAACATCGAGACGGGCGTATTCCTCGGCCCGTACGACCCATACCCACGATATTGTTCTCCGGAT  
TCTTTGTGAACTTTGACACCATTCCGGGCTACCTCGAGTGGGTGACCTACGTACGTATGTGCGCTATGGCTTCCGAAGGT  
GCCATGGTAGCCATCTATGGAATGGATAGGGCCAAAGATGCAATGCAATCAAATGTACTGCCATATCGACTGCCCCAAGAA  
GTTTCTGGAAGAGATGTCCATGGATAACGCTCTGTTTTGGGTGGACGCCGTGCCTGATCGGAATCTTCTTTGGCCCTGC  
GCATCATCGCCTACTTTGTGCTGCGATGGAACTGCACATGATTGCTAAGCGGACAGCTTGTGGGATTTGTTTCATAGTC  
TAGGAATATCATTATTACCATACGTTAGAGATCACCTGTACATAGAAAGGGGTTTGGGGCCTAGTGCAGGGGAGGTTGGG  
ATCCCAGGAAAGCTGGATTGTAGCTAGTTGTAGCTTTATCGCATTCTAAAACCTTCTCCCGTGCAGCTTTGTACGTTTATA  
CAGACAGACAGACATACACACACGCATCGCATCGCATCGCATAGGTATCTGGAAGACGATTCTAAATATATACCCATGGA  
TATATATACACCCGTACAGTAGCTGTTCTGCATACCACAAAAAATGGAATTTACATAGAATATATATAGAGTTAAT  
ACTAGGAGTACCCACGTAGAGCCCCACTTCAACACACACTTCAATTGAGGTACATATAATTCTTGTGACCATGCAGAAAA  
GAGTCTGAACTTAAGTAGGTTGAAAACATAACAAATTGTAGACAAGATCCTTTAGAACGGAAACCGAATCGGTGCAGAGT  
TTAGGACACGACTTTCTC **CCAACGTTCTTCACTCCGTCCCT**TAAGTTGTACTCTCAAAAACACACTATAATCTTCTTTTGG  
CAATCGATTTTCGAGCCAGAAAGGCAGCAGCGTGCATCAAACGGAAGTTAGGGCGAGCGTGTAAAGCGGAAACGGAAAC  
AGAAATCATTCCCTTGTGATAGCAAGCGGTGCAGTCCGGGCTGGAGAATCCACATACCCGACGGGAAAGGTAGAACCAAC  
AAATCGGAGAAGGGAACCTGGCCAACCTGGTGATATAAAGCAATTACTATTTTTACGATGGGATGCAATCGGATTTGTGTT  
AGCTGCGCGTATTTGTGATTATTACATTTTAATTTAGTACATGTTTAGTTAATTTTATACGTTACATTTGTGATGCCA  
AAATAAATGCAATTTTCATTTAAACAGCAGCGTCTCCTTCCTTCGGCAGCCACACCCAAAGTAAATTTAATGATAGC  
CTTGATGTAAAACACATTGGATTGATACACAAACCAAGTTTAACTACAGAAATCGGTGGCAACATATTCAGGCTGCTTT  
CAAAGGACAGTACAGCATTGTAATTTATTTAAGCAATCTGTTGTGAAAACCCCCGGGAAATATTCGTTAAGTATG  
GTGTTGTATATTTCCGTAGTTTGTAGCCCATGTTACTGTACATTAACGTTAAAGAATGGCCATTACTGTACACAAA  
ACCATATTAATTTACTGTCAAAATCTGGTAGAGTATTTTTAATAAAGAACCCAAAACATCATCGAT

### 30. Itgbn

ATATTAGTTACGCTGGACTTCTAAGGCCGAACGGTGCCTAGCTCCCTTAGCAAAAAAATATATGTGATCGTTGGTAGTG  
AAAATTGCACGCATTTTGAATAATGACGTCACCTGGGCGGAAGGGCGTTCTTGTGGATATATTTGGTTTTTCTAATAGCTGA  
GATCTCTCATTCCGGATGCAGATTCAATTGATGATCAGTGCAGGCACGCAGACAGCTGCGAAAGATGTTTATCCGCTCATC  
TGGAATGCGCTTGGTGCACGGACAAGGAATACCAGGTGGGATATCGTTGTCTCTCTCGCCGGCAACTACTTAACTACAAC  
TGCAGTGAACGGATATATACGAGAACCAGCCGGTCTAGATGTCTTCAGGATAAGCCCCTAAAGGACTACGAAACCAG  
TGATCAGGCTGTCCAAGTACACCCCAGCGGCATACCTTAAAGTTGGTCAAAGGAAACACGCAAAGAATGAAGCTGAGCT  
ATAGAATGCACGCAACAATCCACTCGATTTGTACGTATTGATGGATCTAACCTGGACAATGAGGGATGACAAGAAAACC  
CTGGAGGAGTTGGGAGCCCAACTCAGTACAGACTCTTAAAAATCTAACAGGAAACTACAGATTGGGATTTGGTTCTTTTCG  
GGACAAGCCAACCTTACCCATGATTTGCCACAGCATAGGGAAAACCCCTGTGCTGCGGAGCGGGCCACGTGTGAACCAA  
CCTATGGATATAGACATCAACTTTTCGCTAACCGATGATATAACAGCGTTTACCTCAGCCGTGGCGAACAGCAAAATCACT  
GGAACCTTGGACAATCTCGAAGGTGGCTTGGATGCTCTAATGCAGGTTATAGTGTGCACCAAGGAAATCGGCTGGAAGGA  
ACAAGCTCGAAAAGTGGTGTACTTAGTGACCGATGGCTTTATGCACTTAGCGGGGACGGTCTTCTAGCAGGTATTATCC  
AGCGCAATGATAAGCAGTGTACCTGAATAAAGCAGGTGAGTACACGGGTTTATTGAACTACGACTACCCCTCGCTGGAA  
GAAATCTATCGGGAGTTGCTTCGTGCAAGATTAATGTAATCTTTGCTGTACCCGAGGAGGTTGTAAGTAGCTATTGGGA  
ACTCAGTGCCTTAATGAAGGAAATAGTTACGTGGACATCTAAGTGTGATTCTCTAATATATTGGAACATAATCAAAA  
AGAGCTATGAGAGTTGATTAACGCACCTCAGTTGCCGATAACAGCCCGATTTTATTGACATGGCTTACTATACGGAT  
TGCGGTGGTCACTTTCCAGCTTACAAAAGCGGAATTAAGTCAATAACGCTCACTCTGGGCAAGCAGATTGATTTCTACGT  
GGACGTCACCTCAAGAAATATCCCGATAATCAGGTTTATACACACAAAATCCGGGTGGAGGAAACCTCCTTGGAGCAGT  
TCATGGATTTGGATGTTGAGCTTACGCGGCCGTGTCCCTGTGAGAAACACCAGATCCGGAACAGGAAAGGACGTTTC  
CTGTGCGATTATAAGGGCTATTTGTACTGCGGAATGTGCGAATGCGATGAGGGGTGGACTGGGACCTATTGCAACTGTCC  
CACAGATGCCACAAATGTACCAGCAATGAAGCTCTGCTCCAGAAATGCCGTCAACCGTTTTTCGGATAAAATCCACCTCCG  
AATTGGTTTTGCTCCAATCACGGGACTGTGACTGCGGAACCTGCTTGTGTGATCCTGGATATACGGGCTCCTTTTTGCGAG  
TGTCGCGAATGCCGACTGCGATGAAAAGCTGGCTGATTGTTTTCTGCGGCAATGCGTTTGCAAAATACGGATGGTCCGG  
TAGCAAATGCAACTGCGATGGGATACCGATGCCTGTGTGGGACCCACGGGCGAAATATGCTCGGAAAGAGGCACCTGCC  
AGTGCAGGAGTGCCAGTGTGAGGAGCCGATTTGGGTAAATCTGTGAAATCGATCCAGAGAAGGACAACAACCTTTGT  
TTGTTCTACGAGCCCTGTGTACATGTCTGATCGAGCAAAAACAGGGAATGGGCGTCTGCGAAAACCTTGACTGAAATATG  
CAGCAGTTTGGATAGACAAGAAACCTATCCATACAACCTTTGTCCACGAGCTGGATCCTGAGCAGGATCAATGCTTGGTAC  
GACTGGTGAACAAACATGGCATCCAATGCGACAGCTTCTTCGTCTATCAGGTCATCGACCACTCAAACCTTCTTGACCATC  
CAGGCAGTTGATTGCGAGCCCCCGGATTACGTGGCTCTGGTGGGATATATATCGGCATTTACGCTGCTCATTGGACTTTT  
GATCATTTTTCATAATCTGTGGTACATTCGAGCTAAGGATGCCAGGGAATATGCCAAGTTTGGAGGAAGATCAGAAGAATA  
GTGTCGACAGGAGAATCCAATTTACAGGGATCCAGTGGGTAGATATGAAGTGCCCAAGGCGCTAAGTGTTAAGTATGAT  
GAGAATCCTTTCCGAAGTTAAATGAAAAATGTTTTTTTTTAAAGATATTAGATTGTACTTTGACTTAAAATTTTCTTCA  
AAATTTGTGTATACCCGTACTCGTAGAGTGAATATACACTAGATTGCGGTTGAAAAGTATGTAACCCGTTAGAAGTAA  
CGTTTTCCGTTTATTTTTAGTTTTTATTTTTCTTGTATCACAATACATAGCCGAATTGACTGGCCTGTCTGT **CCG**  
**TCCGTCCGTTTGTATTTTTTTTTTTTTTTTTT**TAATTTTTTGTCCATTTTCTGTGCGTATTTCCAAAAATCTCTCCTTCGCATTTT  
TACTTGATGAGTAATGGATAGCTGATATTCGGTTAACTCGACTATAGCATTCTCTTGTTTTTAAGCTATTGTAACCTCA  
AGAATTACGAGTTCACGAAGACATTAATACAAATATAAATTTTAGGTGTTTATTAATAAAGTATTAGCCCCGTTTCAGAAAT  
AACATTTCCAATTTCCAAGACTGGTCAACAATAGCACTATTAAGATCAATAATTTTTATATAATATATTTAGAACATAAAT

TTGTTTTTTTATACATAGAAATTATATGAATTAGTTCAAAAACCTCGTGTATATCTACGCTAAATGAGCTAAAAATTTATTAC  
AGCTAAAAAACGAGTAAACGTATAACAAAGTTAGCTTTTCAGTTTTTCGTATTGGACAGCTCCTTTTCAGCGATTGTATTTCAT  
ATAAGTACAAAAATAATGGCTTAAGACATCGTTTTACATTAATCCGCTTGGGGAGTATAGATGACTACTGGCAAATCGGAA  
ATGCAAAACATTACCTTAAGAGGCATTACAAAAATACAATTCGATTAATTAAGGC

### 31. bves

ATCGGTAATAGGGGTGACAACCTCTGACCGCTGGCGGGTTTTATTGTTTTCCCTTTTAACCACTTCTTTTGGCTGCTATTTG  
CGTTTTATTTCGGCAGTTAATTCTCGATTTATGATTAGTTACTATTAGTGAGTCATCAAAAGCACGGCTGGTATTCGAATC  
GGCAATTCATAACCGGCTGTTCCCTGGGCTTATATCCCAGCTGTTTTTCGACTCTCCGTGGGAGCGAGCACGAGTAGTGAGC  
AGAGAGCGAAAAACACATTTCAACCACCACACAGTGGGGTACGATTATTATTTTTTTAGAAAGTTACCAAAAGTTGTCTAA  
ATACGTTTTAGACCAAAGATGTCAACTACGCCAAAGCAACCCAGCTGCCTAAGCGATGCAAAATGTGACAGGCGGCAGCAG  
CAGTAGCCTCATCAAAGGTTAGCTCACCATAGCCCCAGCTAAATATTAACAAATACGGAAATAAGAGTCTAAGGCCAT  
TAACTAAACGGCTGACTAAGCTGTAAAATGCAAAGTAATTCAAATTTCAACTAGCTAGGATATGAACCGCAAGCAAAAA  
TACATTCAGACACCAACCGCAAAGCACAAACATTTGAAAAGGGCAGCAGCAATAACAAAACAAACCACCACCAACAAA  
GGTTGAGGAAAACCGCGCGTAAGCAACAACAACGAATTAGGCGAAGGAGAGAAAGGTGGAAGATAGAAAACAAAAGGCAG  
ATTTTTGGCATTTCGCTTAGCGTGGACAACAACCAACCAGTACATCAACCAATCAATTTGGTAATTAGGCAAAATACGTGC  
TGCAAAAAATAGCTCAACGATCAGGCTGAGAGGAGAGTGACAGACTGAAACGAAGGCAGTTTCGCTGGATCAACGGAAATG  
**CCCAGCACGGCGGGCAGTGCAGCTGGCGTTGGTATGGGCGCCCTGATCAACAGTGCCGGCAGCAGCGCCAGTAGTGTTCAT**  
**GGGCATTGGCATGGGCAGAGCAGCTGCTACGGGAGCAGGAGCACCAGGCAGTTCCGGGATCTGGAGCAGATGCCTCCGCCG**  
**CCGGCACTTTAATCGCCCAGAGCACGGCGGGAACGAGCGCCCGCCAGCAGTGGAAACGATCACCTGGGACAACAATGGAACC**  
**CTGGCATCGATCAATCCCGGCGATTGGTCCATCGAACAGTGCCTCGGGCCACATCACCTGTACTTTTCAGCTCGGCTGGGC**  
**CTTTCCTTCCTAGCCTTTTTGGCTCCACACGGTCCCTACGGCGCCCTGTGGATGCGTGCCATGTCTGCTCATTGGCTGCC**  
**TGATGATGGGCATGCATGGCTACTTGGTGGCCTTTGCACCGGAGTGCCTGTGGTGGGCGGATGGGATTTTTGTCAAC**  
**TTTCATCTATCTCGTGGTGCATGCGGCTATGCGGCTGTGCGATTTCGAGCAGGAAATCGAAGCGGCTACCTGGCACT**  
**TTTCCAGCCGCTGCACGTGACGCGCCACCAGTTCAAGAAGGTGCTCAACTGCATGAAGGTGATACGTGCCCTGAAGTACC**  
**AGGAGGTCACGCCAGGAGAAGGTCACCAAGGTCGACAGCCTGTGCTGGTGTGAGCGGCAAACTGGTGGTGTGCGCAG**  
**CATCAGCGCGCCCTGCACATTGTGTTTTCCCATCAGTTCCTAGACTCGCCAGAATGGTTTTGGCGTCTCGACCGATGACTA**  
**CTTTCAGGTCTCCATCATGGCCATGGAGGAGTCGCGGGTGTGATCTGGCATCGCGACAAGCTCAAATTTGTCAATTATGG**  
**CCGAGCCCTTCTTGCAGACCGTCTTCGATCACATTCTGGGCGGGATGTGGTCAAGAAGCTGATGCAGGTACCCAGGTG**  
**AGCGAGTCGATAGCCAGCAATGGCTTCCCTGCCCTCTGGTGGATATGCTGAGGATGCGGAGGACAAGCCCATGTTGATACT**  
**AAAGAAGAGTGTGGATGTGGGACACGGACTGACGGCCCTGATCAACCGGCAGCTACAGGCGCATTAAACCATCTAGATTT**  
**CTGTCAAATTTGTTAAACCATTTTTCAAATGGCTTAAACAGCCGTAATTAATATTACTTCAGAATTGAACAAATTTTCATAT**  
**GTAGCGTTCCTAACATGAACTTACTTAAAACAATGATCTTTAAGAACAACATACCAATTTTTGTATAACCTTTTTTAAC**  
**TGATTATTGATGCACAGAACATATGTACGTTGGTATTCTTTAAAGTCATAATCATCAATTTACTGACTAAACCGCTTAAT**  
**TTCCTTGTTCCTTAAATATTAATATAAAATACAGAAATGGGCTATTAATAAGTGTGCTGTTACGATTTTTCTGTATCTGTA**  
**CTCTCAGTATTATTTTAGTGACCGCTGCTGGGGTTAGCTCTTCCCCACGCTTTTCATTAACATTTTGTATGTTTTGGGGCTC**  
**TTGATTTCTCCACTTCGACCTTGTGTGTCTCCCTCCCTCTTGTGCTATCACACTCTGTCCACTATCTATCTCTGTTTG**  
**CACGCTTCTGTCATGGCGAAACAACATAACTTTACTTAAATGAAGCCCGTACGAGCATGTTTCCTTTACTCGGTGCGACGT**  
**ACAAACAACAACAACAACAACAACACTACTGCTACTGCAACAACAACACTAGAACAACAACCGGTACAAGAAGCAACAACC**  
**AGCGCCAACAACACTCGAGCAAAAGTGAATCTGAATTTATGCAACCGCCGCTGCTGCTCAACTTGCCACGAACAGAAATC**  
**AGAGCA****CCCA****TCCGCTTTCACCTTTGACCTG****GCACAAGA****ACTACC****GAAAAACA****ACCCCA****CCACACAT****GGCAACAGCC**  
ATCAGCCATCAGTCATCAGTCAGTCAGTCATCAATCATGCGCAGCCACACCAACAGCAACATCGATCAGCATCATCAGAA  
AAGAGCGAAAAGAGCTGTGCAAGATATCTGGAAGCTATCCATCTAAATCCGCATCCTAAGTTCATATATAATAATCTCA  
TCTTTAGCATAGCAACTAGCACTAGCTAAACAAGCATCTAACACATCTAATCGTTCTAATAGCAAACTTTGTATTGCCCC  
CACAACCTGCAACAATTAGCCAGAGACTTGAGTTTTTTGTGTAAGTAATTGACTTTGGGAAAACATAAACTTTTTCGTCTCA  
GCGGAAAAGTGCTAAAACACCGTGTACCATTTAGAAGAACTTGGAGAAGTTACTAAAGAAGTTTACAGGCGTGAAAAA  
AAAAATGATTGCCATTTCCCCTGATAACCTTTTTTAGGAGTTTTATTCAAAAAACATAAGTAGTCTTTTATCAAACGT  
ACACTGACTTAAATCTAGGAAACTGGGAGAAGTGCCTAAAATGATTTGTAGTTTTACCTGACAACCTCTATTTAGCAGTGT  
AGAGAAAAACGTAACATCGTAGACCGTTATTAATAAAAAAAAAACAAGAAAAAAACTATTCAATTAACCCGTAGTAATA  
TACTTGTATTCATGAAGATAAAGAAACCAATTAATTTACAAAGAAAACACAAAAACAAGTAGGAACTTACTTACATTG  
CAACACTGTTGAATTCATATGCTCCCTGAATCCTTCGCAAAAACATCGTTAACTGCAGTCAAACCAGTTGTAATAAAT  
GTAATTTATTTTACTTATCATGGTTGTATGTATGTTGAGTTGTAGTCAGACAAGACACTTGATTGCACATGAATTAGTT  
TCAGTTTGGTGGGGTTTTCAATTTGAACACGATCAGAAAGCCAACCAAGGTTTTAAATTTGAAATTAATTGATCGTGGTTTT  
TGAGTTTGAATTGGAATTAGTAATATTTGATATATCACGCAGTATACAAACATTTTATATTAGTGGAAGTTTTTTGAGTCG  
ATCTTCTACAATATAAACGATTATTACACTCGTGAATAAAGGAAACCTTTGTAGACGCAGACTATTTTCCAAGAACCTA  
TTATAAGTATAATGACTAGCATTGAAACTGGTTTGATTACAGCTCTTCAGCTTCAATTAACCGATTCTAGATCTCAAGATC  
GATCAGTCTAGTGACAGGTGATAGGTAATTAATGAACTTTTCGCTGGGCCAGGAGTTTTCAACGCTTTATTTGATTAAA  
TTCTTATTTCTACCCTTGGCATTACTGGAATTTACTGTGTCAGCATCAATCAAGTCTCTAAATCTCCATTTAAT  
ACATTTATTTTATTTTGTATTTCTATATGCATACGTATTTTGCCTTGATTCTGTTGATTGATTGTCATACAAATTTGAGCT  
TGAAGAAAGCGTGAAAACATAATAGAATTAATATCGAATAATATTTGATAATGTTAAGCAATACATAGCCTAAGTTGTTG  
TACATACGCTATATATATATATTTGCTGTACATAATCCCGAGTGCCTCAAATCCGAGAACCACACCCCGTCCCTAAT  
CTCCACTAATACTCCCCAAGAAAGTGAATAAACGTAGTGGAATCAATGTGAATGTAACAAGCCAAAAACCGAAAGCT  
AATAAAACAAAAAAAACACAC





CATTCAGTCTTTGGCGAGATTTTATCGTGTGCGGACGTATCTGCGGTGCGAATTGCGGAACTTGAAAATCCAAATCCGAGT  
GGCAAAGATACCGAATTTGCGAAGTAAAACCGTGTCTCGTAGTTGACGCGAATTTTGTAGATGCACTTTCTCAGCATTTGGC  
GCCACAAGCAAAAGACTTAGAACTCTAATTCGATTGCGTTTACTCGAAATCGTTGCTTGCCACATGCTAAAAGTGTCTAG  
TCGGCAAGCACAAGTTCATCAACATGCGTCCAAGCTGGATGGAAACGGCGGCCTGGCTGCTGGGGCTCTACTGCCTCCTG  
TGCATCGCCGCGATGGTGAAGGTGCCAGCAATTCGGTAGCTCTGGCTGCGCCACTGCATCCGCTGCCAAGGATGTGCG  
CCATATGCACAGGTGCAAGAGGCTGGACAGGCGATCAGGACGGGATCGAGTCTCTGACGGCTATCAAGCAGCCCAAGC  
AATGGCCAGAAGCGCCCATGGACTCAACAAGAAGCTGCTCAGCCAGATGGGCTTCATGAAGGTGAAGGCGCCCAACAGC  
CACAAACAGGAAGCGACTGGCGGTTGAGTACGACGCCACTCCTCGCGCATGATTACACATGTTTCATCATCAAATGGC  
GCCAAATATGCACACTATGCTGGACCCGGTGCAGAAATTCATCGCAGAGCAGCAGGACAAGTCTGGCCACAAAGGTA  
ACGCACCCAGCAGATGGCATCCAGCACACCAGTCGCAGCAGCCGCATCAGCAGCAGTTGCAACATCACCAGTTGCCGAA  
GCGTCGGCGTTGAAAGCTAACGGGAAAAGGTCTCGTTTCCCTTCAGCTCGAATGGCCGGCCGGCCGCATCTACCACTG  
GAACCTGCCCGTCTGAAGGAGGCGCTGGCCAAGAAGCCCACTTCGCCACGCTCTCGGCGGCGGATCGCAATAGACTGC  
TGGACATCCAGGGTGTGCCACGCTGGCGCCAGCCCTGGGAGAACGAGACCGCCGAGAAGGGCTTCAGTGCCGGCGGGGG  
AAGGCCAAGTATCGCAAATCCCTGAAGCCCAAGTCACCCACATATTATGCACCCGCCAGGCGGTTCAGCAAGCAGAGCTT  
CCACAAGTACTTCGCGGGCAATGGCAAGCCCAAGGGATTCTATGTCATCAAGGAGCACCAGAAGAAGCCGCGAGTTCTACC  
AGAACATCATCTCGTAAATCCAACGGCATAACCTCGGTATACCCAGGGAATACCTTGAAAGACTGCGGTGCCGGGCGTTC  
TATTTTCAATATTCTAACGAAGGGGAGCTTCTCCCTCTTCGGTCCAGTTTCCACTTGGAATACCCAATCCTGGCGAATC  
CCGATCACATCTATAGCATCCTGGCCAAATGTTTAAACAATTGCGATGGGTGCGTTCTATTTTTATATAACGGCAATGAAT  
ACAATAACAGGTGGGCTGGTCCAGGTGGGGTGCATCTCATATCCATCCATGTGGTTCAGCCATATCAGCACAAAAGAACAAA  
GTGTCAAAGTGACATGACTTCATTCGAGATTTCAATGTAAAAACAAAGAGTTTAAAGTTTCAGAAAGGGGTTTTGATTTGA  
GCACAACTGAGTTGAAACTAATCGGATTATATATTTAATTGAAATTTAATATCTAAAGTTTAAATCAGCTTAGCAGCAGA  
GTGTGAAATATTCGAGTGGCACTTCTCATAACATATCGTTTGTATCGGAAATCCCAAATCCTTTTCTATGAAGGAC  
ACCCATCCGAAGGACCAGTCCAACTGCATTTAGCTAAGCAACTGCGGCAAGCAATAAATTATGGCATAATCAAGCTAG  
GTTTAAAGTGCATGAACGACTTTGTTTTGATAAATAAAAAATATTGACTGATTTTTTAAAGTGAATTCCTTAAAGA

**35. CG14785**

TAGCATAACAAGTCTCCTAACAGCTTCTCCGAAACCCACTCCCAATCTAAATTTTGTAGTTTTTATTTCGCGTTCAATCTGT  
GCAAGTTGCAACCCCTCCCTATCCAACCATGAAGCGGCTGTCCCGACGTCCGGTCTCCGATGAGCAGAAGGCCAGATGG  
GCAACCAGATTCATGAGCAGGGCGCAATAGAGGTATTTCATGTGCGGTGGCCACCGTCTCGCCGCTACTCCGAACGCGGGT  
CTTCCGCAGCTAAAGGATCAACAGGATCAGCTGAAGGACAAAAGCAGGACCCGAGCCGAAACCGGAGCCAGAGAACT  
CGAGAGCGGCGCTCAGGGCGACGCCGGTTCGCTTCCTCGACGTGCGCCACGCTGTAAAGCTCTTGCCAATCGAGGGAG  
ATCCAGCCAAGCTGAAGGCGCTGACCAGCCGCCAGCAAATTGCCAGCCTGCTCAATCACCTCGGCGACGGCGCAGAGGGC  
GATGGCGAGGCCAAGCAGATCGTGATGGAGCTGCTCGGCAGCGGGGTGCAGCCGCACTCGGCCATCGAGCGCGTTTTCCGA  
ACAGCTGTTGCACGTGCTGCGGGAGCAGACTCTGATGGAGGCCGGCATATTTCGTCGGCAATGAGCGGTATCGCTTCTTTA  
AGGGCGTGTGCAGAACTACGCCAAGATATACGGCGCGCAAATTTATAGATAAGCTGCCGAAGCTAGATCAGCTTGGC  
CCGGATGCGGGTGCAGGAGCGGAGCTGTTGCGCCGCGTCTGTCGGAGGAGGTGCTGCAGATCCCGCAGCTGCTGCGCCA  
GCTGAGGTCTGCTCCCTGTCGAAGATGGAGTTCCTTCAACGAGGACACCCGCTTCAAGGCCTACCTGGAAGTCCGTTATCACC  
CGCAGGCCCGTATCCCTGTGCGAACTAATGCTCACCCGCATCTCTCGCTTCTCCTCTGCATTGTGCGCTCACCATTCTTC  
CTGTACTTCCAGGACGAGCTCACGCACATCTTGCGAACTGTTACCTCAGCGTCAACTCGGAGATCGAGATATTCTT  
TTCCGTGGTGTCTGGCTGGAGCACAATGGCTTGAGCGCGGGGACTGCGCCGAGCGCATCTTAGCCGAGGTGCATTTCCG  
CCTTGATGCCGACTTGGTACTTGTGCACCCTGGACAGGTCCAACCGGTGCAACCACTTTGCCCGAGTAATCCACAGTCCC  
GGCGTGCAACGCTTGATTGCCGAGGCCCTAGAAGACGCCATCACCTCAAGTCTAAGCCCCGCTTCAGTGGCGCCGCTTT  
ACACCGACAACGAAAGCATCAGGAGGAGAGGCTCTTGGTCCGCGACTGGATAGTGGATACTGAGTGCAGCCACCACATA  
AGAGCCATGCGAGCAGTTCGTTTACCCCACTACGACGCGTTCAAAGAATACTGGCCAGGATTAATCTGCTGCGCGCCC  
AATGCTGGCGCAGTTCGCTTCCGCAAGAGGTGATCCGAGGAGTTCGCTGCTGCTGCCACTTCAACTA  
GACTCAGCCCGCTCCAGTATTCTGTACCTTCTGCTACTTCTGGGCAGTCTGATTCTGTTCAGTTTCCTGCTTCCGTTCC  
TTTGCCGTGTCCATGTTTTTTTTTAAATGCCATCCACACCACATCCATAATCCTTTACAACACCCCTGACCAATTCACCGACC  
TGATTTAGAAAATAAAGCATTGTTGGCCATCC

**36. CG31495**

GCAGTTATCGCAATCGATTTTGGTGGATAACATAATATACAAAACCAATTTTGTAAAGAACAGCTGATACAATTTGACCA  
TTTCATATCCAATATAATTTCTCCATAAAAAGAAGCCAACCCGGGCGCAAGATGGTCAACATCACTTTACCCAACACTGA  
GGAGCGTGTGAACCTCTTAAAATCGCGCATCAACAGGCTGGGTGACATTACGGTGGCCGGCGATGTTTGGCGACGCGAAA  
TTGCAATGAAAACCAAAAATTTACGGAGGACGAGCTGTGCCAACTGGTCCGAGAAGCCCTCCATGAAGCCATTGTCCGC  
ACTCACGTACCAGATGCCCGAAGGGCTTCAAGTCACTCAGGTCGATCTCCTGGCCGCGGTAAAGATCATTACGCCAGC  
ATTTGGCCGGCAGGAGGAGACTCTCCAGCTGCTCATGCCATATGAATATCTAGATCGTACCGCTTTTCGATCCGAATGATC  
TCTGTCCACCGGACGCCAAGATGGTCTTGCCATCTGGTTCGAAGGTAAGCCCAAGTCAGGCCTAACTACGGTGGCCGCT  
CAAATGGCTTTGAAAACAGACTGCCCTTTTATAAAAATACATCTCGTCCGCCGAATTGCTGGGACTTAGCGATTCCGAAAA  
ATGCCAGAGAATACGGGAAGTCTTGGAGGACGCCTATGTTTCCAGGCGCAGCTGCGTCATCATTGACGACTTTGAGCGTG  
TCATTGGTTACGGCGCCCTGGGTAAGCGGTACTCCAAGGAGTTCCTGCAGAAGCTGACGGTCTTCTGAAGAAAACACCG  
CCCAACAGCCACGAGCTCATCATATTGACACAAGCAATCGTCTCGATGCTCCTGGAGGAACCTGGGCTTGTATCCGTTTT  
CAGTTAGTTACAATGTGCCAAATGTTTCCAGGCTAAAGAACTTATGGTTCATAGTGAAGCTTCAAACGATTTCGAGC  
CCGAGGAGCTACGCCAAATCGAGATCGCCATGGCTGCGCAACGCTCTCATTGGCATCAAACGGTTGCTTGACTTGATT  
CGTGGGTGAATTCCTTAAATCCCAGCCGTCGAGCTGCCAAATTGCTGAAGAAATTTGGCGAAGCAATGGGATGGGTAGG

GAACCATTCCTAGTCCACTTGTACCTCAATACATTTAAAGACGTTAGGTTAGGAAATGCAATATTGTATCTACAATTCAGG  
AAAATAATTCCAAGTGATTCCAATAATTTCAGTAATGCTTTTATATTTAAAAGAACCACGTAAGCATAAAAAAACCATCTA  
AAAAATAATATTGCATTATTTTTGGATGAACCTGCTTCCATTGCATTGCAATGTTCTTAAGACTAAAATGAACAGCCC  
GATAATGTGATTGCAAAGATACTAGATTATTATATATATATATATATATACACCAGGCCAGACCTCTCAGTGGCCT  
TCGCCGTGCTGTACCGAGAGCATTCGGTCCAGGAGTTCCGGTGACCGGTGGGCCAACATCTCCTGGGCTGCTCCAAAG  
CGGGCTTGATGCTGTTGTTCCAATATATATATATATACATAATTATATATATAATATATATATATATATATATATA  
TTATATTGTTCTAGTGTCTTTGGTGATTGGCATAACAAGTTTTATTACCATATTATATATATATAAGTAAAAATAAAGAT  
ATTTGAATTGCAA

**37. xit**

ATCGGACAGCACTTACCGCTGATAAGGAATGCATCGAATCTAAACTACAATCCCAATCCCTGAGAGAAACGAAGATGAAG  
GACCTCTTCTGGCACCTGGTGGGCATAGCCACCGCCTAAAGATCCTGCTGATTCCAGCCTACCATTCCACGGATTTCTGA  
AGTCCATCGCAACTGGCTGGCCATCACCCACAGTTTCCGCTGAATCAGTGGTATGTGGACGCCACCAGCGAGTGGACAC  
TGGACTATCCGCCGTTCTTCGCCTACTTCGAGTGGCTGCTCTCGCAGGTGGCCAAGTACGTGGATCCACGAATGCTGGTG  
GTGGATAACCTGAATTACGAGTCCAAGGCCACCGTTTACTTTTCAGCGGCTCTCGGTGATTGTTACGGATCTAGTGTATGT  
GCTCGGCGTGCAGCTGCCGCTGGGCTCACTGGGATTGGGCAGGGATACGCAGCAGTTCTTTGCCGCTCCATGTTGCTGC  
TCCTCAACGTGGGATTGATCTTCGTGGACCACATTCACTTTTTCAGTACAATGGCTTGCTGTTCCGCATACTGCTCCTGAGC  
ATCGGTTCCCTCATCCGGCAGCGGTTCTCTGGAGCGCCTTTGCCTTCGCCGTGCTGCTCAACTTTAAGCACATCTTTCT  
GTACATGGCGCCCGCTTTTGGGGTCTACCTGCTGCGTTTTCTATTGCCTGGAGCAAGCGAGTGTGGTGTCTGCGGTGGGTG  
CCGTTGTCAAGCTGCTGGTGGTGGACTTACTCCGTTCCGCCGTGCTTTTCGGACCCTTCTGGCAGCAATTGCCGCAAGTC  
CTCTCCCGTCTGTTTCCCTTCAAGCGTGGCCTAACGCACGCCTACTGGGCACCCAATTCTGGGCGCTGTACAATGCCGC  
CGACAAGTTGGCCGCCGGAGTTTGAAGGTACAGGATGGCGGTGCCTCGACGACGTGAGGATTGGTCCAGGAGGTGAGGC  
ACTCGGTGCTGCCAGCCATCACACCGCCTGTGACTTTTGCCTGACCGCTCTCTTCATGCTGCCCAATTTTGGTGAAGCTC  
TTTCGCAGTGCACGAGAAGCCATCTTAATGGTGTCTCTTCCGCTCTGTCTGCTCAGCTGGTAAACCGGGAGGATGCCA  
GATACGCCATATGCTTGGCATTGCCGGCTATTTCTCTCTCTTTCCGCTGCTCTTCGATGCGGATCTGTACATTCCCCGG  
TATTCCTGTACATGCTGACGTGGCCATGATGTACGGCCAGCTGTATCGCATCTTCCCCGGCTTCCGAGGCTTCCACAC  
GCTGGAGTGGCTATACATGCTGGGCTTTCATGGCTATTCCGCTGTACGAGCATCTGCTCTCTTTTCCGCTGTCACCTGGACC  
AGCGCTGCCCCTTCTTGGCCCTACTGCTGACCTCCGTGTACTCGGCGTTGGGAGTGTCTACTTCTTTGGGGCTACTAT  
CTGTACGCTCTGGGCATTAGCTGGGGCAAGGTGCCCATCGCATCGTCCACATCCGCGGCCGCTGTTAAGAGAAAACGAAA  
AACCAATAAACGGAGCGCTATAAAGGGCTTCAGCAGAAATCCGCAATTGGTTCAGTCTTGCATTTCAGAGTGGTAGTGCT  
GGTGGTGCAGCCGAGCAGTCTTCAAGGCGCCTGGCGCAACAGCCAGTTCGGCGCCGCTGGACGGGATTTCTCTGGTCCGAT  
CGGCACAATGGACAACGAACAATGGCTGTTAAGCAGAATTCGGTGGGCAGGTAGCGGTACCCGGCGGCGTCTAAGGTGCC  
ACGTACCTGTTGGCAGCAGCAGATTATGGCCTTTTGGGCCATAAAACAGGTACGAGGCGGAATAGTCCGGCCGGCCGCTTCCG  
TCCGAGTGGGTGACATTCCGGAAAAACCGTGGAAAAACACGCTGGAGCTGAATGAATAAGTGTATATCAATTGCCAGCCT  
GGGCAGGGAATACTTCAGTTGACGAGCTTCGGTCCAGCAGAACAGATCGACATGCAGATGCACATGGAACCTCTCCTATGG  
CCGCGGCTACGATCCAATCGGGAGGCAACCACCGTCTCTTCTCCTCCGTCGCAACAGCACTGGTCCAGCAATGGGTTCT  
CCGACGACTCCGCTTCCGCTTCCGTCGGGGATCCTATATTGAACTGGCCAGCGGAGCCATGCGTGCCTGGAGGACATA  
CGCACCGAGGACTTCATCCAGTCCGGCGTGCAGTCAACTATTTGAGCTGCGAGAGGCGACAGTAGTGAGGATAGACTG  
GAGTGGATGCCCCAGCCTGGTGCACCTACCTTCAGTACGACACACACCACGCCAAGATGGACTTGCAGGTGCAGCCGG  
GTCATCCAATGTTTGTACGACAGGCTGGCCCTCCTGCGATCCACAGTTGTCGCTGCAGCTGTACGAGCTCAAATGC  
CAGCAGCTGCAGGTGGGCGACATATGTTTGTGCTGGTGCACAAACGAGCAGCCCGCCGACCATGTCCGCTCAGCCGGC  
GCCGCCACCGCGTGTCCGCTCCTTCTCTGCCCCGCTCCATGGAAATGCCAGTCCGATGGGTTCTCCGCTACCGGAA  
GCTATGGATTTCTGCCGTTTAAAGCATCCGTACGAGATGTACGCCAAATGGCCAGTTTTTGTGGCCGTGTACACCCAGCAC  
ATGATGGGAAAGCTAAACTATTAAGCCACAAATTTGGTGATTTAACTGGCGTTTCAGGAATATATTCAACGCTATTCCCTT  
GAGTACGCCACGCATTTACAAATTTAATCTAGGTACAAAATCACAATGTATTTTGTCTTAATTTTCTGAAATAAAGTTTA  
AAGTAGCTGTAA

**38. crim**

CTCATTGCGGTACACTGCTCTCTAGGGCGTATCTTTTATTATTTACGTTGTGTATTTGTGTTATCTGTTTTATTTTGA  
AAAGAAACCCCGCTTTATTAACAAAACATGCACTACCATACGAATCTCATTGCAGCCCTGCTGCTGGCAGCTCTAATTC  
ACGAGGGCTCTGCAATTTGGTGTACCGCTGCACTTCGGCCACGCCCGGCTGTGCGGAGAAGTTAACTGGCGGGGAATA  
GGATTCCCTGGGCGAGCACTGCCCGGAACCGGACGACATTTGCGTCAAGGTGACGGAGCGACGCGGCGCCAGGGAAACAAT  
CACACGTGACTGCCAAGCGCGCTGAGCTTCCGCAAAGACATTTCCGCGCAAAATACGAAGGATGTGCTCCTGCCGCC  
ACGATGAAAAGCTAGCGAATACGTAACCACACGATCAAGGAGCACGACGTGCGCCGTGACTACTACACGGACACCAG  
TTCGTTTTCTGCTTCTCGACCATCGATGCAATGGGGCCAGCGGCCTACAAACGTCCGCGTAATCGGTCTTCTCACTCT  
AATTCCTGCCCTGCTTCTACGCTAGAATCTCCTCTTGGTGCAGTATTTAAGTGCCTTACTAACTCGCTCTGCAACTACG  
AATTCGGTCCAACATTCACACTTTTTGTACAACCTTTGACATGACTACAGCTTTTAGAGTCTTGTGTTTACTCAACTA  
ATTAATAACATTTTACCATATTTATAAACAGGAGTGAATCGTTGCTTTAAAGGACCTCTACATTTTGGGCGCCCGGTA  
ATCATAGGCAGCCACCTCGGGTCCGCTCACCAGATGCTCCGAATAGACTTCC

**39. Cdc5**

TATCGCTGTTATCGAAGACTAACCATCGCTAGCGGCTACTGCAAAAAAAGAGCGGAGTTTCGTGGACTCGAGTGAAAAAT  
TGTGAAAATCCATTGTATACGCGACAGAAAGCAACATAAGGCCCCAGAATGCCGCGAATAATGATCAAGGGCGGCGTGTG



TAAACAG

#### 41. Dok

TGCAACCGTGCAGCGCATAAATAAATAAAGTCGACTTGCCCTCTGTGCTCGCTTTTTTGGTGATTTTTTTTTTGTGCTGCGGC  
TGCGCTTTTCGAAATTCGAATCTCCGTATTCGCTGTGCGATATGATGTGATGTTTACTATGAAGTGATCAACTAAATGCG  
ACCGCGAAGCTATCGTAAAGCACAGAAAAACGGATGAATTGAAGGAAAACCTCAGAAATCGCATAGCCCAACTCCAGCAA  
CAACAACAACAACAACAATTCGGAATCGGAGGCGCATTGTGTGAGCTAGATCGGCGAAGGAGAGGGAAAGAGAGCAGGAG  
ACGAAGGAGAGTGGGAAGAAGGAGAGGAGAGGTGGAGGAGTGGTGCACAGAAATGGATGTTGAAATACCTGTTTTGGCTGG  
**ATATCTTAATGTGCCGACCCAAACTGGATTTTCGCTAAATCGCATCTCGAAAAAGAAAGCATGCAGTCGCTACTGTTTTGC**  
**TATTC AAGGCCAGTCGGCATGGGATTGCCCGCCTGGAGATGTGCGAAAGCAAGGAGGACCGGAACCCCAAAATCTTCACC**  
**CTCGAAAAC TGTGTGAAGATCACTCAGGAGCCGCCTCCCGAACGCCTCATTACATTGTCAAGCGGCAGGCTACCCTAAC**  
**ACTGAGCACAAGTAGCGAGGAGGAGCTCAAGGATTGGATCACCGCCCTGCAAACGGTGGCCTTCTGTGACACCTCACCAT**  
**CGGGGGGAATCGGGGCCATCGAGGAGGACAACGACCTCTACTGCAGCTCCTTTGATGGCTTGTTCATTATCACGTTGATT**  
**CCATCCGAGGCCCTCCATTCGTTGCTGCATTGAACCTAAGACATATATGCTCCAAATGACGCCCACTGAACTTCAGTTGAA**  
**ATCGGAGGATTTGGGCGCCACAATCGCCATGTGGCCATATCGTTTCATTAGGAAGTACGGCTATCGCGATGGCAAGTTCA**  
**CCTTTGAGGCGGGCAGAAAATGCACCACCGGCGAAGGCGTTTTACCCTGGATCACACCAATCCACAGGAGGTATTCCGC**  
**TGCATGTCCGCCAAGATGAAGTCGATGAAGAACTGATTAGCGGCGATAGTCTGAGCACCTTGGAGTGCGGTGAGAATCA**  
**GTTTAGTGCGGCAGCTGGCATGGAGCCCGGTTCCGGAAGCCCACTGCCACCATCACCGTCGAGTAATCCCCACGGTGGCG**  
**AGTTCGAGATCAACTCAACGCAAAGCTGCATATCCCTGAGGGGCTTCATTAGCTCTAACGATTCTCTTAATAACTTCTCG**  
**GCGGGTGGAGGTGGAGCAAGTGGCGCCACAGCAACGGGTGGAGGCGTTTTAGGAAGTACCGGAGGAATCACGCTATCCGT**  
**GCCCGCAAATAGCAATAGCAACAGCAGCAGCAAAACACATTCCCAACAAACCGCCACGCAAAGCCCGACAACCCATT**  
**GTGATAAATACAGGAATATTTGTAAATATGAACCTGTGGCCATAACTACGATATCTTCGCCATCCGCCAATTCGGATGTG**  
**AACAGTTCAGTGATACGAAACCCCTGGAAGCGAATCGATATCCCTGCCGAAACGACAGCCGATTTACCGCCAGACTT**  
**GCCGTCGCAAAATGAGAGGCCCTCGAAAGCACCGCTCCGGAGGGGATTACGAGTGCATCGAAAATATCACAGAGGCGT**  
**GGCGCACAAAGGCGTGGGCGATGTTAGGCACAGTGAACGTATGCCATACTCTGCATACCTCAGAATTTGTACGCCAG**  
**CGATCAGTATCGAAATCCACCTGTGGCAGCCAAAATACACCAAGATCATAGACATCGATATCGGTGAGGGTTGCACTAG**  
**CGCCACATCCATTAGTGAATCGAATTACGATCGTTTTAGACTTTCTATCGCCGAACAATAAGACATCGAGTGGCTATAAGA**  
**CCATTGTGAATGTCACACCCGGTAATCGCATACGATGCAGTCCACCGCCACCCAATGAATACGAATTGATCGCTAGTCCC**  
**GATACGGAAAGCTTCCGTAAGCCGATGACAGTCACTCGCGTTACGGGGTGTGCGAAAGGCTAGCACCCTACGAACAA**  
**TAATAATCTAGGAATCTCCAATAGCAATATCAGCGGCGGTAGTAGCACCATCACAACGCAACGGCCAAACAAAGGCGGCA**  
**ATCTCGAGGCGGCAGCCATCGATCATCGCAGCTATAATGGCCTCAACTACACAATGGTCAGCAAACCGAAGCGAGTGTAA**  
**AATATTTAAGGATTTCCAGATCCGATAGCAAGGATCCAGAGATCCTGGCATCGAACTGGGTGCAGTGGGGTTTTGGGGTGG**  
**ATCGGGAGGAGATAGTCCTAGTTTTTATTTGTCCAGAAGTGTGCTGTTTTCAATTTAATTC AACACAACCTGTTGACA**  
**TGTTAATTTGGATTTTCCCAGTAGTCAAATTCATGACTATTTCTGTTATTGGACGACGCCAGATGAATAAGCTTGTGTGCT**  
**TTTCGCGATACATTTTAAGTGTTCGATAACAAATGTAATGTATGTTCAAAAAATTTAAAAAACAAATTTGAAAACAG**  
**TAACGTGCCAGTAACTTTTTACATAATTTTACATATTTTGGAGTATAAGTGAAAAGAAGAGACTGCCGAGTGCCTTACAG**  
**TTCTACAAAAAGAAAGAAATTCCTGGCTGGAAATCGAGGGAAGGAAGTGCCTCGAATCTCTAAATCCCAGAATTTGTCTT**  
**TCCCTTTGCCAAGCCAAAAACAAATACCATTGCAATCGTTCAATTTTTTTTTTTTTTTGTAATGTTTTTTCGTTAATTATG**  
**TAAATTCGTAATCTGTGATTGTATTGTTAATTGTGAACTGTTACATTTTTTAGCAAGCACTGCCCGCCACTTGATGATC**  
**GCATCGAAAAATTCCTCCGCTTACTTAAAATGTAGTGTAAATTAAGCAAGAGAAAAATGAACTCAATCGAATC**  
**ATGGACGTAACGAAAATTTACAAAATGTGTATGCGATTTATGCTAAATATATGTGTTTTTGTATTTAAAGGAACTAGA**  
**TTTTAAATACACTGCAATTTGACTTGTTC **CCGTTTATCCGTCCGTCTTCTCA**AGGTTTTGATGCCATATAAAATCGGTTAT**  
**TCGAATTTGTTATTCCTATACGTTTTTGTATGATAGATCATATAGCTGCCATAGGAACAAACGGTGAATGCCATTATCTC**  
**AAAAATCACCCAAAATAGTTGACTCTTATTTTTTTTTTTTTTTGCTCAATCTTAGACTGTAAATATACAATAGGTTTCTTA**  
**AGTGTGTTTTTCGATTGCACCTCCTCTCAATAACCCAAATAAGAAACCCGCCCATCGTTACCCCATGCACGTTTCGAGTT**  
**CTCAAGCCAGGATTTGTTGTAACGACAGTTTTGAGTATTATGCAAAGGTCACAAAAAATTTTTATATAAAA**  
**TTAAAACGAACAAACGAAGGCGAACACAATAAGAAAAATACC**

#### 42. Drd

AGTTGACGTTGAATGTTTTCGTCTTGGCGGTGCTTAATTTAATTCGCTGAACGCTGACACAAACGATCCGAAAAATCATC  
GATCATCGCCGAGTTGCAAGACAAATTTACTATTTCAATTGTTGTCAATTTTTTTTTTCTGGTGTTCAATTTCTTTTGCAT  
CTTTTGCTCTTGTGTTTGGAGTATTTGTGTGATTATGTGCCAGAGAAGTCAAGCTTATAAGTCGCAAAAAAGAAAAGTA  
CTTAAAAGGGGTTTTGGTTAATCCAGGATCCTTGACAGGAT**GTTCGCGTATGTGCGCATATGCTAGCACTACTACTGGTACTA**  
**ATTGCCAGTAGTCAGGCGCTCGAGGGCGTGGTCCAGCCCACTTGCAATCTAAAGGACAATTGCAATTTGGGCGATAATCT**  
**TCTGGCCGGAACAAATTCGCATCCGATGCTGGCGATGTGTCTGCCGATAAGCTGGAGAGCAAAATTCGATCGATTTTCG**  
**AGGATAAGGTC AACTATAGTCTAAAGTTATTTGCGGACGATGCGACGACAACAATCCTGGAATATCAAACGGCCAATTTG**  
**AGTCAGTTGCATGCGGTAACGCCTGGAATTTACACGATACACCAGATGGAACAGGCGGAGGATGATGACGACCAAGTGA**  
**GGAGGATAAGGAGGCTTATTTGTACAACATTTGGCAAGCCTTTCTGCCATTACGCAACCCCTCGACGCGGCGAGAAATC**  
**CGGATGCCCTGCATTTTGTGTGCCGCGAGATGCATCAGTTTTCTGAACGCCTTGGACAACCTTCGATCTGTGGGCTCTGAAG**  
**ATGCACGACTCCAGTGGCAAATTTGAACCTCGGGCATTCTGAATGGCAACATCAATCAACCCGGCGATTTTGACCAGTGCCT**  
**GGGCATTCAGCAACGCATGAATCAGGATCAGGATGCGGGCCAGGATCAGGATGGTGACTCCATCATTTCGGGGCCAGTATT**  
**GTTTTGGCCTATGCCAGCCCGTTTTTGGCCACACAATTCGAAGCGATTGAAGAGTTTTCTTCAAGCTGATCCAATCACATGGA**  
**CCTTTTAAGAGCGAGTTCAACGACCCCGGCCACCGAGTGCCTCGCTACTCCTTGATCAACTGGGGCCTCTGTGTGCCCTC**  
**CGGCTGCTCCGCCCGGATGTGGAGTACAGTGTGGCCGAGTATCTGGGCAACCAGACCGCTTCCACGGGCATCACCTTCA**



ATGTCATTTGGAAAGACCAGAGTGTGCGAATCGGAATCGATTAGCCCCTGGGTGTCCGGAGTGTATGGACGCTTGATGTT  
CCAACAAGCAATGGCGTCTTTGTTCACCTGCGTATAGAAGATGACGCCGGTCTCGGGGTCAAAGACCTCGGCGGTGGACT  
GGCCATTCATGCCACGGTACCAACGTATTTAAAATCGTAATACGAATCGCCAGCGGTACAGTGTGATTTCGTTTTGCAGC  
ACGCGGTTCGAAACCTTGAACCTCTGGTACTGGCCAGGCGTGGAAATAAATGTCCTTGGAGTGTATCGGATTCATTGG  
GCCACGGCCAGCCCAAAAACGCCATCCGTCCTACGAGTTCACGCGCCACATTTGAAATCACCATGCAGAGGATCGA  
AGTGGAAAGAAGTTGTGCTTGACGCGGTAGGATTTGTCTTCTCAGGGAGTACACAATCACACCGTAGGCCACCAAAATCC  
GGAATGTAAGCAAAGGCATCTTGGCACTCCGAGCGGTCCGATCCACAACCTAAATATTGATTAATTCGATCAGTTTTGGA  
ATTTAAATAATACGCCATGCATACTACAATATTCGCAAAGAAGAGTCTCTTTGGTCTGATCAGCGGGAATGGTGAA  
ACGGCGCAGTAAAGTATCTGTTTTCAAGTCGAAAACCAGGATTGAATTGGGCGTAATCTGCTTGGGACTGCCAGGATGT  
CGGCCAAGCCAGTATCGAGCACCCACAGGCGATCGCATACTGACTTGAATTCGGAAGGTGGAAATGACAGTGGAGTTG  
TCCTTCAGCTGGATGCCGGCATCTTGGCCTTGTCCGCGTCCAGACGTCCACCGGATGGTGTCTTTTGGTCTGTGGCTG  
CACATCGATGGGCAGCTTGTGGCCTCCCAACTGGGATACGGATGCAGCTTTGGCGACTTCTCCGTCGAATTAATGTGCA  
TGTAGTTGAGTGTGGCAGCAACACCAGCCTTCCATCTAAAGGGAAAACCTTGTTTAGTTACTAATTACATTTAAACCTGAC  
ACTGGCAAGTAACAAATTAATAACATTA AAAAGTACCATTACCTGCGCAATTATTATGACTGATTGGATATAGTCTAAT  
ATAAGCTATAGTTTTAATTTATATCTTAGCACTATCAGTTAAAACCTTTGACGGCAACTATAGCTTAAATAATTATGCTGT  
ATTATCAACAAAATATACTTTTTTTTACGTATCTT

#### 45. lethal(2)gl

GCACACTAGACCCACCGATCGCGACTTTGTGTGTGTTAAAATGACGCGCATATCGTTTTGGGCTAATAATATTGTTACG  
TTTTATAAAACAGATACACGGTTAAGCTCTGACCGGTGCTATTATTATCTGTGTGTTCTTGGTTGACACGTTTATTTTCAT  
TTATTCTCATTTAAAGCAACGATGTGAAGAACAGTGCGGGCGTTTCTCAACATAAGAATACATACAAAACCTTATGCGTGAT  
GGTGAGCAAATAAAATAGTTCAAAAATTAACCTCGGCCACCGCCTTAACCGTACAAACGGAAATACATAAAGTTTTAGAATA  
AATTCGGCCACAATTAATATACTTATTTATTCATCAAAACCAACCACCACAAGAGCATAACCAATCATGTTAAAGTTTA  
TCAGAGGAAAAGGGCAGCAGCCAGTGTGACAGACAACGCTACATCGTAAGTTTAGAATAAATACGGCCACAATTAGTA  
TACATATTTATTCATCGAAACCAACCCACCACAAGAGCATAACCAATATGTTAAAGTTTATCAGAGGAAAAGGGCAGCA  
GCCAGTGTGACAGACACCGCCTACAGAAGGACCTTTTTGCTTATCGTAAGACGGCACAGCATGGCTTTCTCATAAGC  
CTTCGGCTCTGCGTATGATCCAGTTTTGAAACTTATGGCAATAGGGACGCAAAACAGGGGCTTTAAAAGTTTTCGGTCAA  
CCCAGGATTTGAATTTGACGGTACGATACCTTTGTTAAACAATTCAGCATCGGAGCTTAATGTACAATTACTTTGAATGGGT  
GTATGGAAC'TGGTCGCATACTTTTCGTTGACGGCAGCGAATCAATTAATTCATGGGAGCCAGTTGGAGCAACGTTGCTGC  
CAATCAAAACACTACCGTTTTGACGGCAAAC'TTAAAAAGTTTTCATCGCTGTGCTGTTCTCTCAGTAAGGATCTGCTATGG  
ATTGGAACAGAAGGTGGAAACATCTATCAACTGGATTTACATAACATTTACCATTAAGGAGCCTGTAATTTACCATGACGT  
TGTGCTAGAGCAGGTGCCACCAGCCTACAAGCTAAATCCTGGTGCAATTGAGTCAATCCGCCAACTTCCAAACTCCCCTA  
GCAAAC'TTCTAGTTGCATAACAATCGCGGCCCTTTGTGTTTTGTGGGATTTTTGAAAGCGCATCTGTCCAGCGAGCATA  
GCCCCGGACATGGACAGAGCGTTGGTCTTACAGTGAAC'TTGAAGGATCTGAATTTACCTGGTACCACGCTGATGGTTC  
ATACGCCACTTGGAGCATAGATAAACCAGAACCAGCGTGAATGTTAATTATGTGCCTTATGGACCTGATCCATGCAAAA  
GCATAAATCGACTGTACAAAGGCAAGCAAGATCCAACGATGTAATGTTTTTTCCGGCGGCATGCCACGGTCAGCATAT  
GGTGATCACAATTTGTGTGTCCGTTACGCCAGCGATGGACACAAAGTGTGTCTTGACTTTACGTCTAAAGTGATTGACTT  
TTTTGTGACC'TTTGAAAATAATAGAGATGTGCTGAAGTTCTTGTGTTACTACTTGAAGAGGAACTCTGCGCTTACGATC  
TTACTGACCCTAATATTTGTGCTATCAAAGCGCCATATCTTCACTCTGTCCATGCATCAGCTGTCACTTGAATTAACCTT  
GCTTCTGAAGTCTGACAGTCCGGTATATGAAAGTATTTTAAAGACTGGAGATGAACAAGACATTGACTATAGCAATATTAG  
CTGGCCTATCACTGGCGGTACTCTCCCGGATAACTTAGAAGAATCTGTAGAAGAGGACGCGACTAAGCTTTATGAGATTT  
TGTTAACTGGTCACGAAGATGGTCTGTTAAATTTTGGGACTGCACTGGAGTGTGCTTAAACCAATTTATAATTTTAAA  
ACTAGCAGCATTTTGGAAAGTGAAGTCAAGTCTCCGAGATGACGCACTGCAGATATGAGTGGGAACAAGTCAAGTGAAG  
AGAACC'CCATTTCCGAAATCAGGACTTTTTGATCCTTATTAGATGACCTCGTTTAGCAGTGAAGAAAATAGCATTC  
GCCAAAACCCGGCAACTTATTTGTTGGTGGCAGACGGGCAAAATAGTTATAGCCGACTTATAGCAGTTACCCGAAAA  
GTGCT'TTTAAAATACATTTCAATGAATTTGGTTCAGCGATCGTATGATGATTTGTGTTGGAAGGGTCAGCATCAGTTAAACGT  
GCGATCGAAC'TTATTAGACGGAGAAGCAATTCCTACGACGGAACGTGGTGTAAATATATCGGGAGTACTGCAAGTTTTGC  
CGCCAGCCAGCATAACATGCATGGC'ACTCGAAGCAAGCTGGGGCCTAGTATCTGGTGGGACTGCGCACGGCTTAGTTCTC  
TTTGACTTCAAAAAC'TTTGTTCCAGTATTTTCATCGCTGCACTTTAAACCCAAATGATCTTACTGGAGCAGGAGAGCAGCT  
GTCCTGTCGAAAGTCTTTTAAAGAAATCATTGAGGGAGTCATTTAGAAAGCTTCGCAAGGGTTCGATCGACCAGGACCAACC  
AGAGCAATCAAGTACCAACAACGCTGGAAGCAAGACCCGTCGAGAGGCAAATAGAGGCTCGTTGTGCAGATGACGGGCTA  
GGATCCATGGTGGGATGTTTACTATTTGCCAAAAC'TTATGTTACTAATGTCAACATAACGTCGCCAACTTTGTGGTCAAGC  
AACAAATGCCAGTACAGTCTCGGTTTTCTTCTGCAATTTGCCACCAGCGCAGACCGCGCAACTGCCGTCCCGTCGGCAA  
GTGGCAATGCACCACCACATGCCCCGCGCAATTTCTGCGCAGCTTGCTAAAGAAATACAATTA AAAACATCGTGCTCCT  
GTGGTGGGTATTTCTATTTTTGATCAGGCGGGTAGCCCTGTGATCAGCTGAACGCCGGTGA AAAACGGGAGTCCACC  
TCGTGTACTTATGCTTCCGAGGAACAGTTCAAGGTGTTTTCACTTCCGCAACTAAAGCCGATTAACAAATATAAGCTTA  
CCGCTAACGAAGGTGCTCGGATTCGCCGATCCATTTTTGGTTTCGTTTAGTTGTGCGATATCCCCGGAAACACTGCAGAGT  
ATGCACGGTTGTAGCCCAACTAAGTCCACGCGTTCACATGGCGATGGAGAGGCGGATCCTAATATCAGTGGAAAGCTTGGC  
TGTAAGTCTGGAGATGTATATAACGAACAGCATTGATATGTTAACGAATATGGGCGATATCATGGTTTTATCAGTAC  
CTGAATTA AAAAGACAGCTGAATGCCGACGAGTGCAGCGGAAGACATTAATGGAGTTTCGTCACTTTGCTTTACAAAC  
TCTGGAGAAGCAGTGTATATGATGTCTTCTTCTGAAC'TGCAGCGTATTGCTTTAGCCACGTCAGAGTCGTGCAACCCAC  
TGGCGTTGTTCCAGTAGAACCATTAGAAAATGAAGAGTCTGTGTTGGAAGAAAATGATGCAGAGAATAATAAGGAAACCT  
ACGCATGTGATGAAGTTGTGAATACATATGAAATTA AAAATCCATCAGGCATTTCAATATGCACAAGGCCTGCAGAGGAA  
AACGTTGGAAGAAAATAGTGTTCAGCAAGTTAATGGAGTCAACATTTCAAATTCACCTAATCAAGCTAACGAGACTATCAG

CAGCTCTATTGGCGATATTACCGTTGACTCGGTGCGCGACCATTTAAATATGACGACCACCACCTTTGTGTTCTATTAATA  
CAGAGGAAACCATTGAAATACGACGGAAACGAGTACTAGTTCTGTTGTAAATTAATCTATAATTACAAACATTTCTCATG  
AAAAACGAACGGAGACAACAAAATAGGAACGCCAAAAACAGCGCCTGAAGAAAGCCAATTTAACATTGACAGAAGCCG  
TAACCTACTAATTTATTTTATACCTTTACAGAAATACGACGCAAACGAGTACTAGTCTGATGTAATTTAATCTATAATTA  
CAAACATGTCTCACTAAAAATCGAACGGGACAGCAAATAGGAACGCAAAAAATTAATTAATTAACCGGATTTAC  
ATACAAACAGAAAATGACAGAATGATAATATAAAAATTCATTTTTTTATTTGGCTTAAGCGATGTTGTTGCCAAAACCA  
TATAATTTATTTATGATTTTATGTAATGTTTTTCATGTATTTTTCGCGTAGTGACTTTATACCCTTTACCCGATGATGAAAC  
GAAACATGATATTTGTAGAAAGGTACAAAGGATAAAAAGTTGACATTTAAGGCCGATTGTAATAATTAACGCAACCTG  
GATAACATGCCGATTAATTACTTCTGTTCTCGTCCGTATAAACACAAATA **CCGATAAAATTGGTCCGTCCCATTTAATAAAT**  
TGTATATTAATAATGGTCTTTATTTTGGATAAATAATTCAAATTATATAGGAACATTTGGGTTTTAAGGGATAGAAAACAGC  
GCTGGTGTCTTTTCAATTTCCGTTTCGTATGACCGTTCAAAGATTATAAAAAAATTTGTCGTGCCACATTTTTTAAATTTCTT  
TTATTTTCCGTTAAAATATTTGTGATACAAAAAATGCCCTTACAAAATTAGGACAACAACAATTTGCTTTATTATGATGA  
ACAAATTAGGAGTACAAAAATAGCCTGATGCAAGGATGGGAGAAAAAGACCTTGAAGTTCAAAAGAATTTGTTGTAT  
CAAATCCTCAATAAGAAAACACTTAAAATTAAGCGTGTTTCAAATTAATTGTAGAATATTTGTAATAATGAAATTGC  
AACTTTTTTTAGCACGAAATTACATGTATTTAATTTCTTTGGCTAATACGTGAGTTAAAAAAGGCTACATTTTGTGATGATC  
TCACAAATGTAATTTTTGCATTTCTACACAGGTGCAATTAAAAAATTTATGGTTTTTATGAGTTTTAGAGGGAAGAAAATAT  
GTCAATATGAGAAGTAAGTTAATGAGCCTTCAAGTACTTTAGTACATAATGTAATTTAATTTTAGAAATCCTACGGCTTT  
ATATTCAATTGTAAAGTATTTTAAAATTCCTGACGATTTGTAGTAATTTGTTTTGTTCTTAGCTTTTTTGCATTCTCCTCC  
GTTACTCCGTTACTCGTATAGTAAAAGGTATAGTATATACAATAGTATTGTAGATTCGTTGAGAAGTATGTTACAGGCAG  
AAGGAAGCTTTTCCGACCATATAAAGTATATAATTGAGTATTTAGCTTAGGATTATTAATAAAACATGATTTTTATTAA  
C

#### 46. Oseg1

TTGTTGTGGTTGGTGGCCATGGAATCTGTGTGTAACAACGCACCTGCATTTAGGAATTTCTACCAACTATGCAGGATTA  
GCCAATTCGACTTCTGCAACAATGAGGGGTGTTCTCAAGTGGCTGGAACGCATAGAGTTTCCCAATAGCAAAGACAATGA  
GATCAGTGTCCACAATGTGTGCTACGCACCCGATGGCAGCCAAATGGTGGTGGCTGCGGGGGATCGGTTGCTCATCTACG  
ATCCAAACGATGGCTCCTTGTGTAACACCTTGAAGGCGCACAAAGGATACGGTCAATTTGTGTGGCTACTCGCGGGATGGC  
AAGCGTTCGCGAGCGGAGCCTCCGATAAAAATGGTTCATCGTGTGGTCACTCAGCTTGAGGGACTGCTCAAGTATTCGCA  
CGTGTACTCCATACAGTGCATGAGCTTCAATCCTGTTTTCGCACACCTGGCCTCGTGTCTCCTTGTGCGGATTTTGCCTTTT  
GGTCCGCTGATCAGAAGGCGGTGCAAAAGTACAAGATATCCGCGCGTGTCAATGGCTGCTCGTGGACCAATGATGGACAG  
TACCTGATCCTGGGCTTGGCCAATGGCACCATATCCATTAGGAACAAGTTGGGCGAGGAGAAGGGGAGAATCGATCGGCC  
TGGTGGGCCCAACAGCAACGTCTTCAGTGTCCAATGTTGTCCGGCCAGCGGTCTGGCAGTGTGGACACCATCGGTGTGG  
TGGACTGGAGCCAAACGCTATCCTTTACACTCTGAGCGGCCAGATGATTGGCAAGGAGCGAACCTGGGCTTTGATCCC  
TTGTGCCGTCAGTACTTTCCCAATGGGGAGTTCTGCCTGGTGGGCGGCTGCACTGGAGGTCTACACTTCTTACCAGGGA  
GGGCATTCGGCTGGGTACGTTGGGCGATACCTTTGACACCTGGATCTGGACAGTTGCCCTACATCCCAATGGTCAATCCT  
ACACCATTGGGTGTCAAGATGGAACCTGGCCTGCTTCAACATTGCGTCTAGTACCCTGCATGCCCTCTACCGCGAGCGC  
TATGCCTTCCGGGAAAACATGTGCGACGTGATCATTGACACCTGATCTCTGGCCAAAAGGTGCGCATCAAGTGTGCGAGA  
TTTAGTTTCAGAAAATAGCCATTTATCGGAATCGACTGGCGGTTTCAAGTTCGCGGAACGTGTGGTTCTCTATGAGCTGAGCT  
CTGGAGAGGATCAACCCATGCACATATAAAGTGCAGGAGAAGATCCAGCAAAAAGTTGCACTGCAGCTTGCTGGTTGTTTTGT  
GGCCGTCACATTTGCTTGTGCCAGGAGAAGCGTCTCCAATGTCTGGATTTTCAATGGGTGTCTGTCAGCGCGAGTGGATCAT  
GGACTCGTTTATAAGATACATCAAAGTACCCGGTGGCCCCGTGGGAAGAGAAGGACTAATGGTGGGCTTGAAGAACGGCC  
AAGTGTTCGGAATCTTTCTCAACAACCTCACTACCCTGCTCATCACCCTGCGGTGTGAGCGGTTGCTGCTGCTGGATATC  
AATTCGAAGCGCAGCAAGATCGCAGTTGTGGACGATGTGGTCTGTTGTTGTGCGGGACGTAATCAACGATAACAATTTT  
GTACCAGGATACGGGTGTAACAGCGTCACTTGGAAACCCACCTGGATTGATGCTCTGCTATACACACAACAGCGG  
GATTAAGCGTTCGCTGGGGAATCTGCCGCGGAGCACACAGAACATGCATGGCCTGGTGGTGGGCTTTGCGGAGCC  
ACTGCCTTCTGCCGCGGAAATATTTATGCACAATACGCCTTTGGCTCTCGGTTCCACCATGTGGCAGTTTCAATCGAAGC  
TGGATTGTTTTGACGAAGCCTACCAGGTGCGCTGCCTGGGCGTACCACCAGCGACTGGGAGGATTAGCTCAATCCGCTC  
TGGAGGCACCTGCACATAAATATCGCTCGCGATGCCTACGTCAAGGTGAGGAATCTTCCGTTGGCTCAAACCTCATCGGTGAG  
CTACGAGATCAGCAACAGCGATCGGCGGTTCTAAGGAGGTACTTCTCGCAGAGAATTGCGCCTTTGCGGCAAGTTCAA  
GGAGGCAGCTCGTCTATTTCTCAAATGCGGCCAGTCTCAAGAGCACTTGAATGTACACAGATCTACGTATGTTTCGATT  
TAGCCCAGGAGTATATTAAGGACGGCACCGACCAGGAGAAGAAGGAATGGTACGCAAGCGAGCGGAATGGGCATATTCG  
GTTAAGGAGCCACGAGCTGCTGCGGAATATTGCTTTTCACTGGCGAAAATCAGAAGGCCATTGATATTGTGCGAGAGCA  
AGGATGGGCCGATGTGCTTTACGATATCGGACGACGACTGAGTCTTACGGAACCGGATTCCCTGGAATCGGTGGCCGAGA  
ACCTAAAGACCTCAAAGCTCTTCCCTGGCTGCTGAGATTTTCAAGAAGCTGGGCGATGAAGCCCAGGTGGTGCACCTG  
CACATCGAGGTACGCGACTGGCCGGAAGCATTTTCTGTTTGGCGGAATCGCTGCCGGAATTTCTGCCACGGTGCACCTACCA  
GCATGGGCAATGGCTGGCCGAAACGGATCAGTTTTATAGAGGCGCATCAGGCCTACATAAAGGCAGGACGCACCAAGGAAG  
CCAATCGTTTGTCTTAAGCAACTGAGCAATACGGCCATCGTGGAGGAGCGCTACTTTGGATGCGAGCTACTTTTTATTGGCTG  
CTGGCCAAGCAACATTTAGATGTATATCACGCCAAGGAAGAACAATACTCTGTTGATCACCACCTTACGGAGTACAAAA  
TCATTTACGTGTTGCCAAGGTTTATTACGCCTACAGTGTATATACTCATATATGAAAGAACCATTACCACACATTTCC  
CAGTTAGCCTATTTAACGTAAGCCGCTTTATACTAAACGAAGTGGAGCACAAAGGTGTCCCAAAAGGTGTGAGCATGTTT  
TCGGTTCCTTCACTCTGGCCAAGCAAGCTAAGTTTTTGCAGGCCAACAAAGTTATGCCTTCTTATTAACAAGAGACTGCA  
GTCGTTGAAGCCACCAGCTGGAGTCCAAGAGCAGATTGATCTAAATTTTCTAAATAGCAAGGCTTGCAAAAGTGGCTTCA  
ATGATCCGGAGGAGCTTTTGGCACATGTTTACAAGTGTCCAACTACAGTCAACATTTGAATAGCAATTGCTGTCCCCT  
TGCCGGCAGGATTATATTTTCTCTTTTCTTCCCTTCAAATTTCTACCCTAGTACAATTTTATCCAGAAGTGGATATCTC

TGATGCCGAGGCGGAGCGCTTGCTGCTGGCTCCTGCAAAGCACGCCGAGGATTCGGATCCATTTAACGAGGATGTGGCCA  
GTGCATTGCCTTTGGAGCTTGGATCGCAATGGCCTGCGTGCCATAGATCCCAATCATGTGCTGATTCTTAAACGGAGGGGA  
AAGAATGTGCGGAATGTGTACTATCGTAATATATTACCCGATCTTCAGGTTACCTATTGTCTCAATGTCTGCTGCTTTT  
CTATGCCGAGGACTTTGAGCTGCAAGTGTGCAAAAAGGTCAGTGTCCCTTTTGTACACATCCTCCGAAAAGCTGATGG  
AAGACTTTTGAATCGACATAAGAAGTGTGTGCAAATATATAATT **TCCGTCCAAA**ACTGTACAAATAGGA

**47. PkaR2**

AACTTTTTGTAAATTTTTGCTGACACGGAATCGGAATACAGAGGCTTCTGCTTGGATATATTTACCGTTTCGCACTTGT  
TTACGTTTTGCCATTAATAATTTTTCAAAAAATCTAACGAGTAACAGCGGTTGAATCGCCGGTGGCAAAAAATATAGAACCCT  
GTGCCGTTGTGCGTTGGTGGATCGCTGGAAAATTAATAACGAATCCAGCAATCAAAAATCTATTAACCGAAATACTTTCAA  
AACATCAAACAACAGCGAAAGCGGCAATAAACACCAACATCAACGATCCAAAAATAAATGTAGAAAAACAAGGAAAGTCC  
ATGAGAGTAACAAATTAATTTGGTTTTAGCCAAAACAACAAAAGCAAGCTAAGGAACAAGGCAAAAAAAGTTCAGCGAAG  
AAAGAGACGGAGGAGCAGGTGAAACAGGTGGACGCAGGAGACCCACCCACCCGAAAGAAACTATCACCACCAGCAGGTGA  
CAGCAAAGCAGCAGAAAGTCAATGTGCGAGCGATTTCGAGTCAAGGATCCAGGTGCCCGAGGAGCTGAAGGAGGTGCTGC  
TGCAGTTCTCGATCTCCTTTCTGGTGGAAACAACCGCCGGATGTGATCGATTACGCTGTGGAGTACTTCACCAA

**48. Ppcs**

AATTCGTCCCTGTCCAACACTGCAATCAGCTGTTACCTGGCCAACCGTTTTTTTTTTTTTGGCCTGCACCTTTGAACCCCG  
AGGTTTTCGTGCGAATAAAGATACGGATTTGAGTGC



CGATCGATCCGGCGAACTGGAATTTAAATCCCACAACACGTGTGTTTTGATATCCTTAAATCGAAATAGCGACAGAGTGC  
ATGCAATCGCAATTTGCCGGACGTTGTGTCCCTGGACAACCTGGTGTGTGTGTCAGTGGCAGGCGACGCGACAATTTGATT  
TGCTGTTTTGCATATATGGGGTGGAAAAGAGTGGCAGCTTTGCCCGTCTAATGTCTTGTGCGTTTTAAATTTATGGCGGC  
CCAAGCCTTGGCGCCTGTCTATCCGAAGCAGGTCAAGTGCCACCGTGCCAAAGGTGAGCTTAAAGCACCTCAAATTTGAGT  
TTGAAAGCGGCGTAGCGAAAGCTAATTAACATCCCACACTCACACAGGCACCTGAGTTATTTCTTGGCCAGGCTGAGATAG  
ACTGGCGCTGGGCATGGGTTTTCCACATCCGTAACCTCAGGGTCTTTGCGGACGGCAGCCTTTCCACATTTTTATTGCAT  
GTTATGTCTGTTGCCACACGCCCGTGGCCATAAGCTCCATGCCGCCCCGCTAAACGAACCTCTGGCGAAGGGTTGGCGGT  
GGATTTGTATCCTCCTTTTCATGGAGTTGTAA**CCACTTCCGTCCGCCCCGCAATTT**GTGGTTTAAATTTTTCCAGCCACAAC  
TATGCAGTGTCTTGTGTGTGGCCGGCAGTTTTGTTTTCGTTCTGTGGGCTGGGCAAAAAAAAAAATTCACATTTCT  
TTCTGACGTGGGCTTTTTGTGGGTTTTGCTGGGATGGTTGGCTGGGTCTCTGCGTTGTTGGTGCCTGCATCAAATTAAT  
TTTATTGCGCTCGCACGCACCGCAAACACCGGCCTGGGAACAGATACCGAACATGGGAAACAATCACACATGTGGCTTAG  
GATTTAAGCCAGGCTCCGCATTTCTTCTGTTTTCACTTTCTGTTGCTCGTTTTTATGGCCTCGCCTACCTTAGTGTGC  
ACCCACATATCAAGATACCCCCCATGTGTACTTCTCCCCGCTATCGATTGTGCATTAAGTATAAACATAAAAAATTC  
AGTTTGCCAACATGAGTTGCGTACAATAAAATATGTATAACTAGCCAAGTGTGCGAACAAGATGGCAGCTGCGAATGGAT  
GGTATTTGCTTTTACTGGCAAATGGTGTTTTTCTTTCTCAATGAGTACTAAGAGAGAATACTTAAGCATGCCAACATAA  
ATAAGCTACTTAAATACCAAATAAGTTTTCGAAACATACATGTAAATTCGAGAAGAACCTCTCCATATCCGTAACCTTAGG  
ACTGCATTTGATGAAAAGGTCAGTCCCTGATAAATCTTAGTGAAATTCAGATTTTATTAACCTAAGTACATGAAAGAA  
TTTCAATAAAAACAGAAAATCAAAAGTTCAACAACCTCTTCAAGTCATCTACATATATGAAATCTATTCTCTATACATAAA  
TACATGTACTATATATCCAAGAGGGGAATAAAACCAAGTGAACCAATTCGTTAAAGTTTTCAATATCCAATTTGGACCAA  
CCGATAAGAACAATAATAGAAAAAATACAAACAAGCTATAATTAATGACGAATATATATATATATATATATATATATGTATATGT  
GTATATCTCGATGTATACCTTAAATATAAAACGAAACAAGGAATTTCCATTGAATATTTACTCTCTACAAGCATTTTG  
CCCTCAAGCTAGATACATAACTATTTTATTGTTGAAAACGAAAACAATAAATCCAATTTGTACGCAATGCAGTTTTGGT  
CACTGCACCTGCCCTCTTTCTTACCAGGAATCCATGAGCTGTTAACTGTAAAACCTGTTGTAATAATGTTTACCAAAAAATG  
TACCATATGCCGTACTAAGGTCTAGTATCCATATACATATACATCTACAAAGATACATCAATATATATATATATTTGAATGT  
GTATTAACCTGGAATGAAATAGCTTTAAATGTATAGACAAACGAGTGTGTGTT

**49. RecQ5**

ATCTCTAAACCAGCTGTTTTGGCGGCAACCAGTTTTGGTCTGAAGCAAAACAATGTTTATTTAAATAAAAACGCAATTTAA  
ATAACAGCCCAAGT**ATGGCGCATGAAAGCGCTGTGCACGAGGCGCTGAAAAAGCATT**TTGGCCACTCGAAATTCAAATCG  
**GATCTACAGGAAAAGCCGTGAAGTGC**GCTGTTAAAAAAGCAGGATGTGTATGTGTGATGCCACGGGCTCGGGTAA  
**ATCCCTGTGCTTCCAAT**TGCCTGGTTTTGATGTGAGAGAATCAAATAACCATTGTTTTTTCTCCGCTTTTGGCTTTGATTA  
**AAGATCAGATAGATCATTTAACC**AAACTGAAAGTGCCGGCGGATTCTTTGAACTCCAAGATGAGCACCAAAGAAAGGGAT  
**CGTGT**TATAATGGACTTAAAGGCCGTGAGAACCAACCTGAAGTTTCTCTACATAACCCGGAACAGGCCGCCACCAAGTT  
**TTTTCAAGACCTGCTG**CAAACCTCCATAAACACAATAAGCTTGCTACTTTGCAGTCGACGAGGCGCATTGTGTTAGCC  
**AATGGGGACATGACT**TTTCGACCGGACTATCTAAAGCTGGGGGAGCTGCGTTCCAATATTCGACGTCATCTGGTTGGCT  
**TTGACTGCCACAGCTTCA**AGGGAAGTCAAGGAGGATATATATAAGCAGTTGCGCCTCCACCAACCCGTGGCTCAATTTAG  
**CAC**TCTTAGCTT**CAGG**AAAACCTCTTCTATGACATTGTTTACAAGAATTTCTATCGAAGATGACTTT**CAGC**ACCTGGCAG  
**ATTT**CGCCAGACACTGCTTGGGCAATCCGAAGGAGTTTAAAGGATACACCAAGCCACAAAGAGGCTGCGGAATCGTATAT  
**TGCCGGACTCGAG**ACCAAGTGGAGCGCATGGCGATAGGGGTAAC**TAAACAGGGAATCGGAGCAGTAGCCTATCACGCTGG**  
**CTG**AAAACAGGAGAACGTACTGAAGTCCAGGAAGCGTGGATGCGGGGTGATCAGCCCATTATATGTGCAACCAATAGTT  
**TTGGAATGGGTGTGG**ACAAACCAAGTGTGCGCTTCGTTATCCACTGGGATGTACCCAAAATGTGGCTGCTTATTATCAA  
**GAATCTGGT**CGCGCTGGACCGCATGGCTTGCACTATTTGTAGATTATACTACGGACGGGAAGACGCTCCGGAGTATACG  
**TTTTCTTCTCAA**ACGATGCCACAGAGCCAGGGGCTGTTGAGACAAAGAGCTTACCGGAGAGAGCTATCAAACAAT  
**TTGAGAAGATAC**CGGAATTTGCGAGCGAACCAACCTGCAGGCATAAACTCTTTTTCGGATTTCTTTGGAGATCCAACCTCA  
**GATTGTAGTGGGCAATG**CGATGTCTGCAAGCGTCCCAAGAAAGCGGAAAAGCACTGGAGATTTTTTTCATCGATTATGTAT  
**GGATGATGCC**TTTTAAGTGCACATTTTCGCTACAGGATTGCGCAGATCTGTATGAGGGT**GAGTTTTAA**AACTTCGTTATCT  
**TTTTAGCTATTTCTG**ATCTTAAAGCCATATTTTTATACCCGTTACTCGTAGAGTAAAGGCTATACTAGATT**CGATG**AAA  
AGTATGTAACAGGTAGAAGGAAGCGTTTTATGTATGGATATCTTTACCAGGATTACTATCCGAGTGCATCTGGACAT**CCG**  
**TTTG****TCCGTCCATATGAACG**TCAAGGTCTAAGGACCTAGCGGGATCTCTGGAATGATTTTTTTTTTATTTAATTATATGTCA  
AAAAGTATCTTATAGTCGATTAGGTGCGATATAGCGCTCTCTCTTGTTTTTTATATCCTACTAGGCGGCCGACCAGGTATA  
AAGCGTGTGCCAGGAGTACGCAGGCGGTGAATCTGGCTCAGATGACGATTCTGGTCAGAGTCACTCATCAATGGCCAA  
GAGAGCCAAAAGGAATCACAGGATTTCA**T**TAAGCAGCAGTTAATCTT**C**GAAAGCAAATTAGTGCAGCTAGGCAGTTGG  
AACAGGAAACAAT**T**GTCAAATATCTCGCGTTCGAATGGCAGAAGCCACTGAAAAGAAAATCGCAGGTCTT**C**AGGCCACT  
CATCGGGAAAAATATTTGACAGCTTTAATCGACGCACTCAAAGCCAATGTAGACAAGTGCAAAGATGAACCAGGGCAGCA  
GCCAAAAGTGTATTTAAATACAATGACTATGAGGCAATGT**C**AGTAAATATGGAATATGACGTGTTT**C**GCCAGAATAAGG  
TGGCCAATATGTACCGCCATGCCTTAGTTAAAGAGATATCCACAATCAAGAACTCACAGAACAGACTAAATTTAT**T**GCCT  
CTTTTGGTGGACTATAT**T**CCGAAGCCTGAAACAAGTTCTAAAGGTGCTTGGACAGGTGGAAGCGTGGCGTACTTTGAGCG  
GAACTCAAAGA**ACT**TAGAAGAACAAGGCCACAAGCCTTAAAGGAAGTTCAAAGCCCTAAAAGACAGAAAAGGTTTTTA  
AACAGGAAAATAGCAAGCAGACTTCAATTTCTCTTTTTTAAAAAGAAATTAAGAAAGCAACCAATAGACTCGCCAAT  
CAGGAAGAACGTGTAATAATTAAGTGAACAGATTGGATTTAGAAAGAAAGCACACCTAAAGATATTGCTTCCAATCATGT  
TAAGGAGGAATCCGTGACCCAGAAAGTTCTTCTTGATCGT**G**AGCTTGAACCTCAGCCCGACAGCATAATTGGAGAAA  
GGAAATTTAAAT**T**GATGTCAAATGGT**G**ATGGAAGCTATGACACTCACCGCAGGAAAAGAGTTT**C**GCATGAAACTCAACCC  
AAAGAGAAGGAGTCAATTTAAACAAAGTCCAGTATGACGATCTTTTTGGTTCTTTTTAAAGCGAGT**C**AGAGGAGTCTAA  
CCAATCTTTGAATGGTTTTAAACTGCTCGACAAATGCTCGAAGAAAATAATTCAAACTCGAGGGCGTACCTGAAAAAT

TACCTATTAAGGATGGTGAAAAGAGAGTTTTAGAAAACAGGGCCGATTCTATTGGATTTACTTCAGCCAGAGAAAATGTTA  
GAGAGGAGCAAACAAAGGGAAGGGGACGATAAGTCAAGCAACAACTCGAAAACTGGGATTTATTTTCAGCCCGGGAAAT  
GCTGGAGAAAAACAACTTAACGAAAGATGTTTGGACAAAAAAGACGTTAAGGAAAAAGAAATTAGAAAGTAGGGAAACCA  
AAAGATCGCTACAAAACAACGAATTACAACATAAGCAAGAGGAAGACCGTAAAGACAAAGCATCCCACAGGAAAACGTCA  
AAGGAATCGTTATCGAACTTGAAGAAGGAAGGATCCGACTCCAGAGTTTTGCAAAAAGGATACAAAACCAGAAAACAGAAA  
CCATCAAAAACAGATGTCAGCAAAAATGTGGTGCAGTGGCTCAATCCGTATTATAAAACGAAAAATAGCCACCAAAAGAGC  
TTTTCAAAGCTTTGGCAAAAATGCTCACTCAGCGCATTGTGTATGGAAGCTTAGGAGATGGCGATGCTGGAAAGTGCTAT  
ATAAAGGAACTTTTCATGGCCTGCAGATGATAAACAACGATCAGGACATTGAAAAATATTTTCATAAAAATCCAAGTGACT  
AAAAATCTCCTAATGATTTTATCACGACATATTGTTTCGCCTCGTTAAAAGTTGCATCATCTTTTTTTTTTCGTTAGTTAC  
TATTTTTGTATATAATAAGCGCATTAATTATCAATAATACATTTAATAAGACGTTTTT

**50. sbr**

**GATAGACCTGTCAGAAATTAAGAAAACAATATCAACATCAAGCGAATATACTTCGCTCGCTACATATTTCTAGTTAGTTT  
TCGTAACTTTTTCGCTTTGGTGGCAATTAATCAAATTTCCCTCGAAGAATAACTTGTAAAAAGGTGCGAAACATCCGTCC  
AGTTTCGCCAACCATCGGCCACTGGCTATCGAAAGAAGATCGCTAGTGAATTAATTTTCAAAAATTGCGTTGTACTTT  
GGCCGTGGAAATTTGCCAAAAACAGCAGCTACTTTGCTGCTATATTAGCAAATAGGTTTCAGGAAGTCGAGAAAAATTTT  
TCCAGAAGTTGGCAGCAGTTTGTGTGAATGCAAAAATACATCGCACATAGTTTTTTGCCCTCAAGACAGTTTTTCTCAGT  
AATAACAACAGCACCCACACAACACACAACACCCTCAGCTAAAAACGTGCTGAAATTTCGCATATCTTTTTGTTGCATA  
CGTTTTTGAGTGAATATTAGTAAGATGCCCAAACGCGGCGGTGGCAGTAGCCAGCGGTACAACAACAACGTTGGAAATGG  
CGGCGGACGTTACAACGCTCCCGAGGATTTTCGATGATTTTGTATGTGGAGGATCGCCAGCGACGCAAGGATCGAAACAAGC  
GGCGGTCAGCTTAAGCCCTCCCAATGTCTACATAACAAAAGGACATCAAGCTGCGACCCGAAGATTTGCGTTCGATGG  
GACGAGGATGATGACATGAGCGACATGACCACGGCCGTTAAGGATAGACCCACCTCCCGACGTCGGGGATCGCCATTCC  
GCGGGCAAGTTCCGGCAAACCTGATGCCAACAGCTTTGGCTGGTACCAAGTCACGTTACAAAACGCCCAGATATACGAAA  
AGGAAACACTCTTGAGTGTCTATTGGCAGCGATGTCGCCACATGTCTTTATTCCTCAATATTGGCGAGTGGAGCGAAAC  
TGCGTAATCTTCTTTACGGACGACTACGAGGACGCCGAACGCATTCAACATCTGGGCAAGAATGGCCATCTTCCAGATGG  
CTATCGTCTGATGCCACGAGTACGCAGCGGTATACCCTAGTGGCCATCGACGATGCCTCAAGGAGAAGATGAAGGTCA  
CAATGGCCAAGCTTTACAATATCAAACCAAGGCGCTGGATCTTTCCCGTTTTTCATGCAGATCCGGATCTTAAGCAAGTT  
TTCTGCCCACTCTTTTCGTGAGAATGTGATGGGCGCTGCCATTGACATTATGTGCGACAATATACCCGATTTGGAGGCACT  
TAACCTGAATGACAACCTCCATTAGCAGCATGGAGGCGTTAAGGGTGTGGAGAAACGCTTACCGAACCTCAAGATTCTCT  
ATTTGGGGATAACAAGATACCATCTTTGGCCACCTTGTAGTGCTTCGCAATCTGTCCATCTTGAACCTCGTTTTAAAG  
AACAAATCCCTGCCGTTCCCGCTACAAGGATTCCCAGCAGTTTATCAGCGAAGTACGTCGCAAGTTTCCCAAACCTGGTTAA  
GTTGGACGGAGAGACCCCTGGAGCCGCAAATCACATTTGATCTATCCGAGCAGGGACGTCTTCTCGAAACGAAGGCATCCT  
ATCTGTGCGACGTCGCTGGTGGCAGGTTGGTGCGCCAGTTCCTGGACCAGTACTTCCGCATATTTGACTCGGGCAATCGG  
CAAGCTCTGCTAGATGCCATACCATGAGAAAGCGATGCTCTCCATATCAATGCCTTCGGCCAGTCAGGCGGGCAGATTGAA  
CAGTTTCTGGAAGTTCAATCGCAATCTCCGGCGCTTGTAAACGGCGAAGAGAATCGCACCCGAAACTTGAAGTACGGAC  
GCCTGGCATGTGTTCCACATTTGGATGAATGGCCAAAACGCAGCAGACCGACGCACCTTACCCTGACCTGACCATC  
TACAATACTTCAATGATGGTTTTTACCCTGACGGGATTATTCAAAGAGCTGAACGACGAGACCAACAATCCCGCCTCCAT  
GGAATTATATGACGTTCCGCCACTTTGCCCGCACCTACGTGGTGGTGCCACAGAATAATGGCTTTTGTATCCGCAACGAGA  
CGATCTTTCATCACAACGCTACGCACGAGCAGGTGCGAGAGTTCAAGCGATCGCAGCACCAGCCTGCTCCCGGAGCTATG  
CCCTCCACTTCCAGTGCAGTGACCAGTCCCTCAGGCCGGGGCAGCGGGCGGTCTGCAGGGTCTGTAATGCGTTGGGCGT  
GGCCACTGGACCGGTGGCTATACTATCAGGAGATCCGTTGGCGGCCACCGCACCGGTTAACAGCGGCAGTGGCGCCATAT  
CGACAACAGCAGTGGCACCTGGCGCCAGGATGAGAGCACTAAAATGCAAAATGATTGAAGCCATGAGCGCCCAAAGCCAA  
ATGAATGTGATCTGGAGTCGGAATGCCCTGGAGGAAACGAATGGGACTTTAACCATGCCCCTTTGTGTTTCGAGAAACT  
ATCAAGGAAAACAAAATACCGCTGAGGCTTTTATGAAGTAAATCGCATAGGAGTTTCCGTAGGACAGAGCCGCGTCC  
ACATCCACATAATCGAATGCTGTTTTTTTTTTTTTTTTTTTTTTTTTTTTTTTTTTTTTTTTTTTTTTTTTTTTTTTTTTTT  
ATAATAATAATTAATATTAATTAAGCTGCGAAGTTGTGTGCACATTCGGGCAGTAGCAATTAATTAATCCAGCACTGCGGGC  
AATGTGCATCAACGATCACAGTTCTTCGATAGATTAGTTTAGCTCTCTTTAAGTTCCGTCCGAGATCCCGTGGTCTACA  
TTGAGGCCAGGACGAGTCTGCGAACGGTAGTCCCTTTAGAGTTAAAGTTGTTTTAGATTCCCTAAGCCAAACACCTTCAAA  
CACACACAACACGACAACACTATTAACGTAATGCAACAATGTTGTGCAATCGAAAGAAACCCAATTTTTTATTTAATAT  
ATACGACGATACCGAAACCAAGGCGATGGTCAAAAAGCATGGATCGCGCCAATAATTCTATATTCCCGCTTTCCAGAT  
CCTCGACTCGCTTACATTTTGTATACAAATACCATAGAATAAAAAGAAACATTTTGGACCTGTAAAAATTTTGTAAACG  
ACTCGGAAACCAAATTACCTTTATTTCTTAATAGAAAAAATATTTCGATTTACAATACACGCTTAGCCGTAAATTCAA  
TTGAATTTAAGTGAAGATATATAAAAATTAATATACATTAAGACAAAAGTGTAGATTTCATAAATAAATTTTTTCAGAATAG**

**51. SPoCk**

GCACTTCCATTTCGAAAGCCTGACGATGTGCCATCTTCCGGGCCGTTGTTGACGCGGTGAATCGAGGCGGAAAAATCGATT  
GTGCTCGTGTGATTATTTTTGTTTTGATTTGCGGCCCTCCCGCTCTCGTAATCCTCGCGCGGCCGCGGCCACATGACTCAT  
GCCAGGCAGGAACAATGAAAAATCACAAATAGTACGTCAAATTTGCCCAAGACCTCGATCTGAGTTTCCACAGTGATTTG  
GACCTGCTGCCGGATACGGCAGCCGACATCGACGTAGAACTAGACCCGGCTGCGGACACGGATGTGGCCGCGCTCAGTGT  
GAACGTGCCCGCTCTCTGGGCTGGACGAGGACGACGACGAGGTCATTATCGCCCCGGCGGGCGGAGGCTTCGAC  
TAGCTCCCACGGCGGGAGGCGAGTGGCGGCACACAGGCAGCATCATCAGCAGCACCAGCAGTGCAGAGCTAAAGAAC  
CAGCTGGAGCAGAAGCAGATTCTGCCCAAGACAAGATCTGCGGACTAGGACGACAGCATCGTGCAGACGGCCCTTAC  
CCTCACACCTGAAATGCTGTTGTCACCTCGGAATCATCGACCCACAGTGCCTCCGAGGTGCGCGGACGACTGCAGGTCG  
ACGTGCTACCGGCCCAAATGGACAGAGGCCAAGTATCGTGCCAAGATCATCGGGCATAACGAGCTGCTGCTCGTGCCG

GAGGATCCGACATGGAAAAAGTACATTGAGCAGTTTAGGAACCCGCTAATTCTGCTGCTTCTTGGTTCTGCTCTGGTGTC  
CGTAATCATGAAGCAGTTTGACGACGCCGTGAGCATAACCATTGCCATCCTAATTGTGGTCACGGTGGCCTTTATCCAGG  
AGTACCGCTCCGAGAAGAGTCTGGAGGAGCTTAAGAAGCTGGTGCCCTGAATGCCACTGCCTGCGGGAAGGTCGTCTA  
GACACATTCCTGGCAGCGCAACTGGTTCCTGGGGACATAGTGCACCTCAACGTGGGCGACCGGGTGCCGGCCGACGTGCG  
TCTTTTCGAAGCTGTGGACCTATCTATCGACGAGAGCAGTTTACCGGCGAAACAGAGCCGGCGCGCAAAATTAAGTATG  
TTTTGCTTAAACAATACGAACGTAAGGACCACAGCAACATGAAGAACATTGCCTTCATGGGCATCTGGTGCGATGTGGC  
AACGGGAAGGGCATAAGTTGTGTCAGCACGAGGAGCGCAGTGAGTTCCGTTAGGTCTTCAAATGATGCAGGCAGAGAGGC  
TCCGAAGACGCCACTGCAGAAGTCGATGGACATTCTAGGCGCTCAGTTGAGCTTCTACTCCTTCTGATTATCGGTGTCA  
TCATGCTGCTGGGCTGGCTACAAGGTAAGCCGCTTTTCGAAATGTTCAATATCAGCGTTTTACTGGCCGTTGCGGCCATC  
CCCGAGGGCTTCTATCGTGGTAACTGTGACTCTAGCGCTTGGCGTAATGCGGATGGCTAAACGAAATTCATCGTTAA  
AAAGCTGCCTACTGTTGAGACTTTGGGCTGCGTTAACGTTATCTGCTCTGATAAGACCGGAACTTTGACCAAGAACGAGA  
TGACGGCCACGATCATCATCACTTCCGACGGATACATGGCGGACGTTACCGGTGCGGTTACAATGATCAGGGTGAATC  
CACATACGGCATTGCAACAACGTGGAGATGGCTAAGACCAATATTACAAACCTCCTTGAAATCGGGGCGGTCTGCAATAA  
CGCTTACATACAAAATGGCACCTCCTAGGACAACCCACTGAAGGAGCCCTTGTGGCGGTAGCCATGAAGAACGGAATGT  
ACGCCACAGCTGAGAATACGTTTCGCATCCAGGAGTATCCCTCAGCTCGGAGCAGAAGATGATGGCTGTAAAGTGCATC  
CACAAGTACAACAACAAGGAAGAGATTTTCTTCGCCAAGGGGGCTCTAGAGACCCTGTTACCGCAGTGCACCAAGTA  
TCAGTTTGGTACCCAGACGGTACCCTTACCAAGCAGAACGAGGCAGAGTTCTAGCCGAGGCGTACGAGATCGGGCGCA  
AGGGCTTCGCGTGTGGCCCTGGCAAAGGGCCGGTCCATGCAAGATCTGATCTACTGCGGCCTAGTCGGCATCACTGAC  
CCACCAAGGCCCTTGTTCGAGAGTCTATTGAAATGTTGATGCAGAGCGGAGTGCCTGTTAAAATGGTACTGGAGATGC  
CCAGGAAACGGCTTGGCCATTGCGAATCTCATCGGTATCGATACAATCCATCACCAGACGCTTTCGGGTGAGGAAATGG  
ATCAAATGAACGAGCACCACCTGGACAAGGTAGCCAACAACGTGAGCGTATTCTACCGGTATCGCCACGCCACAACTG  
GAGATAGTCAAGTCTTGCAGCGCAGTGGCAACATAGTCCGATGACGGGCGACGGGGTGAACGACGGAGTGGCCCTGAA  
GAAGCGGCACATCGGCATAGCCATGGGAAAGAAGCGGACAGATGTGTGTAAGGAGGCGGTGATATGATCCTGGTCAATG  
ATGATTTCCACACCATAATCGCCGCTCGAGGAGGGCAAGGGCATTCTACAACATTCGAAACTTCGTCGCGCTTTCAG  
CTTAGCATCAATAGCTGCCCTGGCCCTGATTGCCCTGGCCACTCTGATGGACATTGCTAACCCGCTAAATGCCATGCA  
GATTTTGTGGATCAACATCATAATGGACGGTCCGCCCGCACAGTCTCTGGGCGTGGAGCCCGTCGACCACGATGTGCTCA  
AACAGAAACCACGGAACGTGAAACAGCCAATGATCACAAGTCAGTGGTGGTGAACGTTCTGCTTAGTGCCAGTATAAAT  
GTACTGGGCACGCTGTGGGTGTTCCAGCGCGAAATGGCCGACGGGACGCTGGGAAAGACCAAACGGGACACAACGATGAC  
CTTTACTTGTTCGTGTTTTTCGACATGTTAACGCCCTGTCTTGGCGCTCGCAGACAAAGAGTGTCTTTACCATCGGAC  
TCACTACCAATCGAATGTTCTTGTGGCCGTGCTTTTTTCGATCATTGGTCAAATGCTCGTTGTCTACTTTCCGCCGCTG  
CAAATGGTTTTCCAGACGGAAGCTCTTACGCCGTATGACATATTCTTCTGGTCTCCCTAACCTCATCTGTGCTGGTTGT  
TTCAGAGATAAAGAAATGGTTCGAGCGTACCATGGAGCGCAAGATGTACAGCACCCGCTCCGAGCTGGATTTTGTATGAC  
AAAACGCAAGCGCTAGAGAAGATTTGCACCCCAAAACCGAGTAAATTAATAACTAACAAAAAATCCATTAAAAAAGTA  
AACTATGCCAAAACAAGCGAGGAGCGCGGAGAAGTGCAGTTCGAAAGAAAAGCCGAAAATAAGAGCGACGGACCAAGGA  
TGTGTGTGTTTTAATTTTACATTTGACTTGACCAATTAAGAATGATTTAATTTGTTATTGTGGGTTTTCAACCAGATTGCAC  
AGCAGGGATTTTCATAGATTTGAAATCCTACTCGTTCCTCCCCACAGAGAAGCAACCGGATTATAAACAAGTGACCACTT  
ACTATAATCCGAGTATGTTACCCGGGAAAGTGCATTACCCTGGGTACAGTCAACATACATAAAAAATAAACCGGATGCG  
AGACAAAAAGGCATGAAATGGACAAAGCTAAGCGAGGCGTAGTAACGTAAAACATGGCTTTTTTTTTGGTATTATTGATA  
AATAATTTATTCGGTATTTGAAAGCAAGCATTCAATTTGTGTAATAATGAGGCAAACTCAAACCTTAGCGTGTATCAAAA  
ATAAAACAATTTTACGCAACTCATCCCAAATCAACTTTAAAAGGAGAGTTCAGATCAACAAAAGATTTTGTATGTAAT  
CAAAAATGCTATAATTTGACGATATTTGTGGCGTTGATGTGATGCTTTGATAATTAAGTTCATGATTAATGGGCTTAC  
CAAAACGAAGTAAATGCACGAAGCAAAATGAGAAATACGAAGCAATCAGCACCCGCTTTACTCGAATGTAAAGAAATTTTCG  
CTCATATACTTAAATAAAAAATAAATTCATAGGAAAGCATGGTCTTTGTACTATTCTGTTGTTGTTGTTTAAATTTGAA  
CTTTGATGCAATAGATTACTAAACGGCAAAAAGAAATTTACAATAAGCTTATCCAGATTGTAGTCAAAAAGTATACATCT  
CAATAAAAAATTAATGAATTTTGAATAAATAAACAATTTCTATAGATTACCAATACTTGGGTACCCCTTATAAATTAACT  
TAAATATCATTGACATAAAATTCATATCATACCAACTCAGAGTTCACTGTTGCACTGGAAGCATATCACAATTTGTCCAT  
GTTTTTATACCCGTTATTAATAAAGTAAAGGCAATTTCTGTATTCTGTAGAAATGTAAACCCTATCAAAGAATATATATTG  
TTGCTCACTGTGCTCCGATGATATATCCAAGTTTTTTTTTTTTAATTTTGTATTTTTTTTTTATAAATTTTATCGATAA  
TTAAAAACAATTTTGAATACCTCCCTGGCACTCCCACTAGTCGAGTAACGGGTATTTATAGTCGAGATATTGGACTTTA  
GCGTTTTTCAATTTTTTATTTGAATGAGCTTGATTTCAACATTTTTTACAAAATTTCAACTTGGTTATAGCAATTTATGCG  
CACCTGACAGATCGCATTTAAAGGACCAATCGTTAAATACTTCAATTTGATCACAACATTAAGATCAGCTTACGCTCAAC  
AAAAACGCACTCATATCATGGCAAAAAAAAAAAAAATGAAAAACTTAAAAATACAAAAAAAAAAAAAGAAAAACATGGAA  
AAGTAATTGATGAGAGCTCGTTCAACAGATCAAGCAATTGAAGGTTCAATGATATCAGCGCATAAAAGCTCACTAAAA  
GTACATAAGCAGAAAACCAGAGACACACAGGCCACACACGTTTCACTCACGTCTCATCCACAATGGTAAACAATAATTAGA  
AAAATAAGGGTATCAATATAGAATAAAAAATATGAATGTCTGGAGGATTAATAAAAATGCACCAAAATTAATAAATATGT  
TAGCCAAAGCAGGTATACATATGGAATTTAAACTGAACCTACTCAATGTTATGTGTAAGCAAGTCCGAAATTCGACT  
TATAATGAATGATGTTACTAAACGAATTTCTTAACCACAGAAATATTATTGATCGTCTATTAATATATATGTAAGTTTAA  
TGTCTAAGTAGACCGCTAGTTTAAAGAGCTCCGAAAAATATGTTGCCTAAATTCACCATTACTAAAAATAGTTTAGTTG  
GTGCAAAGAAATGTACAATTGATGACAATGGTACGAGTTCTTAAAATCCATTTTTTAAAAACGCTTAACTATAAAAAATTA  
ACTATAACTATCTGTGCTATTAACCTAAGCTATAAAAAATAGATAAAATACCAAGAGTAATTCAAAATACATTCATAAAT  
ACTTCGAGAATAATAAGAACCATGAGAAATGGCATAAAGTAAATGAACCATCATCGTTTTGTTTTACTAAATCTATCCT  
CTACAAGTGTATATCATTTTATAAGTTTAAACAATATTGGGACAAGATCTTAGGCATAAAATGAATTTTCCAATGGCAACC

ATACATTTAATATTAATCTGCGGAATATCGTG

**52. ttk**

AGTTTCGTGCCGTGTGATCAAAGCTTTCGGTAAGGCTTCGGCTCGGCTTTGTGTATCCACCTTAGCGGCTCTCTGTGGTGC  
TCGTTCTGCCTCTCTCTCTCTCGGTTTTGGGGCTCAGCTCAGGGACAACAAATGCGGTAAAATGGCTTCTGCGTCGAC  
GTGCACATCCCTGCCGTTTCAGTCTGATTGGAGTTTCGTGCGCGGCGTTTTCTCAGCTGATTTCTTTGCCTTTTGCTT  
TTCCGAACCCGCTTTCGGCTCCGTGTTTCGCCTCGGTTGCCAATTACGTGTAACCAACAACAAGAGAAGAAACAGAAACAA  
CAACAAGTACTTTTCGAGTGTTCGAAGCCTTCTTCCGCCGAAGAAACCGCAAAACGGATTACCAAGAATATTTGTAAAATT  
GCACGCCCTGGAATATATGTTTTAGCAGCTGTCAGGCCCAAGGAGTAAGAATCCGAACCCAGGACAACGAAAGGACCTT  
TGATGCCCCACTTGTCATGAGGACATAGATCGCGATCGCACACACTCGGACATCGCTTAGTGACGCAACCACAGCCTCCCA  
**ATGAAGATGGCATCTCAACGCTTCTGCCTGCGGTGGAACAACCACCAGAGCAACCTTCTGTCCGTCTTCGACCAGCTGTT**  
**GCACGCAGAAACCTTCACAGATGTGACGCTGGCCGTGAGGGGCAACACCTGAAGGCACACAAGATGGTGCTATCCGCCT**  
**GCAGTCCCTACTTTAATACCCCTCTTTGTAAGTCATCCGAAAAGCATCCGATTGTCATACTTAAGGATGTGCCCTACTCG**  
**GACATGAAGTCGTTGCTAGACTTTATGTACAGGGGCGAGGTCTCAGTGGACCAGGAGCGACTCACTGCATTCTGCGCGT**  
**GGCCGAGAGCCTGCGCATCAAGGGCTCACCGAGGTCAACGACGACAAGCCCTCGCCGGCAGCAGCAGCTGCAGGAGCGG**  
**GTGCGACGGGCTCTGAGAGCACAGCCACTACACCCAGCTGCAGCGCATCCAACCGTATTTGGTGCCCCAGCGGAATCGC**  
**TCGCAGGCCGGCGTCTGCTGGCCAGTGCAGCCAAATGCCGAAATACACCCACCCTGCCGGTGCAGCCATCGCTGCTCAG**  
**CTCGGCCCTGATGCCAAAGCGAAAGAGGGGCGAGCCCGGAAGCTATCTGGCAGCTCGAATGGCACGGGGAACGACTACG**  
**ACGACTTTGATCGCGAGAATGATGAACGACTCCTCCGACTGGGCAACGGCAAAATGTGCAACGAGTCTACTCCGGC**  
**AATGACGATGGTCCGACGACAATCAGCCGAACGCAGGACACACGGATGATCTAAATGAAAGTCGCGATTCTCTGCCCTC**  
**GAAACGATCAAAGAACTCCAAGGATCACCGCGTGGTGAAGCATCATGAAGACAACAGCACTTCCGTTACTCCTACTAAGG**  
**CCACTCCAGAGCTCTCCAGCGGCTCTTCGGCTCCTCTTCGACGACAATCTCAGCAACGGCTCCAGGCGGCAGCAGCACT**  
**GGTCTTCGGAAACGATTTCCCTGCTGGAGATCAGCGATGAAAGGGAGTCCGCCCCGGTTACCTGCCTACTATTTTGGG**  
**CCTGAAGATACGCGCATTAACACTACGACGCTGCGCAGCAAGGATCCCCCAGACGCCTACGAAATCCAAGCGAAGA**  
**TACGGCAGGCGCAGGAATTAACAGCAACTCTCTGCTCAAGCAACAGCTGCGAGGTGGAGCCAAGGATCCTGAGGTG**  
**CCGCTGCCACCAGGATCACGGGGCAGTGACCCCAATGCTGCCCTTAATGCCGAGGAACAGTCCAAGGAGATGCCGAA**  
**GAAAAACCAGGACGAGGTCAACGCCTGCATTGGTCTGCACTCGCTGGCAAATGCCGCCGAGCAGCAGGCTGCTCAGGTGG**  
**CCAGCACTGGGAACCTGCACCACCAGCTACTGCTTACATGGCAGCAAAACAATCCATGCTGAACACCACCGATTACTAC**  
**CAACAGCAGCAGCAGGAGTCTCCCTCGAGTGTGGCCAGTTTTATGGATGACGACCTGGAGCTGCTGTCTCTTAATGATCA**  
**GCAGGATAAAAGCGATGAACCCGATCATGAAATGGTACGCTGGCTGATGAGAACGCTGGTTTTGCCTGGTTACCAGGGCA**  
**ACGAGGCGGAAGCCACACCTGCGCAGGAAGATTGCGCTGCTGCGGAGACAGCAACGGCACCACCACCCGCGCCTAGAAGT**  
**GGAAAGAAGGGAGCTAAGCGTCCGATTCAACGGCGGAGAGTTCGACGCAAGGCCAGTTCGACGCTGGATGATCAAGCGGA**  
**ACACCTGACAGAGATGTCCGTGCGGGGGCTGGATCTCTTCCGGTATGCGAGCGTCTGGAGGGGCTCTACCGCTGTACCG**  
**AGTGCGCCAAGGAGAACATGCAGAAGACATTCAAGAACAAGTACAGCTTCCAACGTACGCCTTTCTCTACCACGAGGGC**  
**AAGCATCGCAAGGTGTTCCCATGTCCCGTGTGCTCCAAAGAGTTCTCGCGACCAGATAAAATGAAGAACCACCTCAAGAT**  
**GACACACGAGAACTTTACGCCGCCGAAGGACATTGGCGCCTTCAGCCCCCTGAAATACTTTGATCAGTGCAGCGGCTGCAG**  
**GGGATATGCACGCTACGATCTACCAGCAACAGCAAGATCATTACCACCGCCAGTTGGCCGAGCAACTGGAGCAGCAAAAC**  
**GCTCCTTTGACAGCCGGGACAGTTGCTTATCCTGCCCGACGTGAAGATGGAGCATGCGGAAGACCAGGATGCGGAACA**  
**GGAGGCGGAACGAGCGATGGTGGCTATGACGCCTCCAATCCAGCAGCAGCAGCAGCCGCCATGTTGAGCCTGCAACAAG**  
**ACGTAATCATCAAGGATGAGATACAGATCTCTCCGTGCGCTCGCCACCCCGCCGCTTCTGCGCTGTGGCGGAGGGC**  
**AAGTCTTTGGCTTTGGCCTTACCCTCACAAACCGCAACGTAAGACTTTGAAGGACCAGAGTTACGGAAGGACTACGAAC**  
**GCACAACAACGTTTTACCTTAAGCAGCGAGCTCTGAACTGTAGAATACATCATAGCAACATAAGCAATCGTGGCACTCAA**  
**CGCAACACACCAGACTCAAACGATTTTTAGTTAATGTAACCCGTAAGCAATATTAATTCTAACA****CTTGGCTCCGTCAG**  
**AACGCCTTTTTTAAGCAACACTAGTATTTAATTTACCTAGGACATAAGTTTTGCCCAATTGAGCAACGCAATTGAGCAGT**  
**TCAGTGAACTTTAATGACTTTTCGGCTTTAATTTATAAACAATTCGACTGGCCGCTTACTGGATCCGCACACGATCCGTAAG**  
**GCAAGCAACTTTAGAACTTTTCATTTCTCTTTGTGATTTTGTAAACCTTTTTATATAGACCTTTGTTTTTTATTTTTTG**  
**TTGTACATAGCTATATTTTGTAAACTCAAAGTCCGTAGTATAATTTTGTTCATTTCTTTGGCAACAAGTTGGAATCA**  
**AATGTATTGGCTAATTGTGCAATCTTCAAACGTTGTTGGTGGCTTCGGAGGAACGCGACAACGCTGTTCTGCGGCCCCAC**  
**GAAATGTTGTAACCTTAATTAACACTAAGGCCACTTAAGTACTAGGATCTAGGTGTAGTCATAAGGCATTGGATCAATGTTT**  
**CAGCGTACAACAAAACGGACTTCCAGTGAAGAGACAAGTATTTTATACGGAATCCCAATCTGGTATTATGTATTATGA**  
**TTTTTACAGTTTACTTAAACGCAACAATAACGACTTAAGACTTGTGCGCTCAATGACTAGAAATTTATAGTTGCGATTTT**  
**GATAACTATTCATGGAAAAACCACAACGAGTTTTTAATAAAGAAAATTTTACTGATT**

**53. yrt**

GTCGTGACCACATCTGGTACACTGCTCGCATAAGATCAACAACACTACTGCGGCCATTCTTACATTCTACTCCTAAAAAAA  
TTCCGAAAGTGCACTTAAATAGCCAAAATAATAACAAAACATAATAGTGACCGGACGATGCAGCACCGCCAACAAAATA  
AAGTGTGAAAACAAGTGATTGAATACCCGAAAGTGCCTCGCGAAGCGGGAACCTAACGTGTTTTGGCTGGCCTGTTTTTT  
CTCTCTCTCTTTTTTCGCCAACCAAAAACAGGCTAACAGTGATTTTTTCGCGGGGGAGGGGGTGCAGCAGCCAAAACC  
CGTAGTAAAGAAACCGCCGAAAGGAGCGCCCACTTTGGCCAGCAACTTAGCTCAGCTCCCCGAACCAAAAAGTGAAGAA  
AAAAACAAAAAATAAAAGGAAAACCTAAGTAAAACGGGGGCGTCTATCGCTTGCAAGTGTGTTGGTTAGTCAGTGTACG  
TGTGTGTTGGCCAGAACAAGTTGGCTGCGCGTGTGTGCGTGTGAGGGGTTTTTGTATGCTGCGCTGTCTTTTTTCCCA  
GCCGAGGTGAGCACACAGGTGAATTATCGGTGCATTTCGGCTGCCTTTGGCAACAATTCATAAAAAACAACATAGAAAAC  
AACAAACGACCACCCGCAATATATAATACATACATACACAGTTTAAAACCAAAACAAAATCCAGAAAAATGCTCCGTT  
**TTCTAAGCCGTCGCAAGGTGCGCAACAACATATGTGGATAATTCGAGAGAGGGCGGCGGGGCAACTAGTTCGCGGTTGGC**

GTGGCTGGGGGTGGTGGTGCATCACCTCCGGCGGCAGCTCACAAATAAAGCCACAACGCATCGTGGTCAACAAGAACAA  
AATCGACTGCCGCGTCAATCTGCTGGACAACACTGACCTTTCCATCGAATTATCGAAAAAGGCATTGGGCAGCTTTTTGT  
ACGAACAGGTATTTCTACGCACTGGACATCATCGAGAAGGATTACTTTGGGCTGCAGTTCATGGATGCCAATCACGTCAAG  
CACTGGCTAGATCCCACCAAGCCCATCAAGAAGCAGGTCAAATTTGGGCGCCCTACACGTTCCGGCTGAAGGTGAAGTT  
TTACTCTTCGGAACCAATACACTGCGCGAAGAGCTGACCTGCTACCTGTTCTTCTTGAACCTGAAACAAGATCTTCTCG  
AGGGGAGACTCGACTGTCGGGAGGACAAGGCCACCGAACCTGTGCTTTGGCATTGCAGTTGAACCTGGGCGCATATGAC  
AATCAGGACATTCGCGCCACCCTCGGATTCGGATTTCCGTTTTGTGCCCCGAGCAAACCGAGGACCTGGAGATGACCATACT  
AGACGAGTACAAGACGTGCCGTGGTCTCACACCTGCTCAAGCAGAAACGGCATTCTGAACAAGGCCAAGTGGCTGGATA  
TGTACGGTGTGACATGCACACGGTGCCTCGGAAAGGATGGCTGCGAATACCACCTTTGGCCTTACGCCACCAGGAATACTT  
GTTTTCGAACGCGATCAGAAGATCGGCCCTGTTCTTCTGGCCCAAGATCAGTAAGCTGGATTTCAAGAAAAAGAAATTGAC  
TCTTATTGTGATCGAGGATGACGACGAGGGAAGAGAGCAGGAGCACACCTTTGTCTTCCGGCTGTACAACGAGAAGGCGT  
GCAAACACCTGTGGAAGTGCGCCGTGGAGCACCACACCTTCTTCCGGCTTAGGGCGCCGGTCAAAGGCCCTCCGCCGT  
CAAACCTTCTTCCGTATGGGCTCTCGCTTCCGGTATTCCGGTGCACCGAGTTCAGACCACGCAGCAGAGTCGAGCCAG  
GAGAACGGTCCAATTTGAGAGACGACCATCGCAGAGATTTGCTAGCCGTGAGTCGCACCTGTTGCGCGAACGTCAAAGG  
CTTCCCAGGAGGCGCGGTGTGCGCTGTGGCTCGGTTAATGCTCGAGCTGCTGCCGTGCGGCTGCCGAGCCGCATCC  
CAATCGCTGCACCGGCTACTCCCTTAGTATCTTCCCAAGTATCGACACCGACTCCTAACAACGATAACAATAACGACGC  
CTTCGACTCGCTCAATTTCCACGGATCAGTTCATCACTGTTACACCTTCCGCTTCCGGTGTACTGTCAATCAAACCTCTG  
CCATTATTGAACCGGATGCGGCTTGCAGCGGCTCCATCAGCTCCTCATCCAGGCAGCAGCCAACCTTTGCTTCGCTGGGT  
CGCAACTCCCTCAAGTCCAACCTCAGCAACGAGGATCCGGCGTACAGCAAGATTGGATCTATTGGCAAGGCGTCAGGATT  
GACTGTGAAATTTGGATCCAGACTACACACCACATACTCACCGAACGCCACTAAGAATTTGATGAAACCAATCCATTTA  
GAAATGCAACGAGCTCCCACCACGGCAGCTTTGGCAAGGCTTCCATTAGCTCCGGTCAGCTCAGGGTGACTATCAACAAG  
ACCTTCGACATGGACCACAACACGGAGACTGAAGCGCTCTCGAACGCCAACGAGAAACCAATAACCAAGTGAACCT  
GGCCAATGTGAACACCACGGCCCTGCCGCTGGCAACATCAAGTGAATATTTAAAGGCTCGCGTTGAGGAGGAGCTGG  
GTGCCGAGGCAACGCCAAGCTTACCAATCAGATGTTCTGTAACCGGCCCCACAGCAGCAACATGCACAGCAACACA  
AACAGCAGCAACAACCATGCACACAGCGATGGACCGGATTCCCTGAACGCCACCTACATATCAGTGGGAGGCGATAAGCT  
GACGCTCAGCATACCGGAACAGAAGCCGTGACGCGGTAGTAGCAGTAGTTCAGCACTTCGAGCACCCTACCACCACCA  
CCAATGGAAATGGACCCATAGTAATGCCACCTTTGTGTCTGGATTGAGTGCACCACTCACTCCGCCGTGCTGCTGCT  
GCGAATCTGAATAATACCGGAAGCGGGTGAATACAACCTTACCAGTGTGACCACCATCAGCACGCCCAGCAGCCCCAC  
CGCCACCCTTAGCAGCAGCCGCTCGGAGTCACTGGCTCCCGCTTTGAGCAACGCCTCGGCCGCCGAAATACTCATTAATG  
AAATATTCATTAACAACATCATAAACAATAATGCCAGCGGCAGTATCACTGCCGAACTGCTGCCAAGCCGGCGGGCAGC  
TCGACGCCCAGTCCCGCACCTTGCTCTTCTCCACGCTCAGTGAACAGGAGCGCTTGAATCGCAGAAAACCAACCAGCA  
GATGAATCAGAGTCTAAATCTGAATCAAACCACAGTGAAGTCGATGCGCCGCCGAGTGAAGAAAACCTCCGAGCAATT  
ATCCGGACAGCAGTCGATTCCGGTTTCCGTCAGCAGCAACAGCAAAGACATGGTATCGCCCTGGCTGGTTTTCTCGGAG  
GTGGTATCGGCACCCAAGGGACGCGAGTCGGCCATCATTGAAAATCCGTTATTACAACCCAGTTGTAATTATTGTTTAA  
CAGTAACCCCTACTCCGCGTATAAGCTAAATGTTCTAATTTATAATCGGTAGCTATGGAAATTTAGGCAGACGTAACGTA  
TTCTGATTTTTATCGTAGACAACTTAGACGAGTTTTAAAGCATTCCAAGCGAGAGCAACGACAAAAAGACAATGAGAGAGC  
AGGTCCAATCAAAGCATACTGTCCCTAAATGTGCCTTAATGATCTATATTTATATACTTTACATATATCATATACACCG  
ATGCGATATCGAGGAACGAAATGTGCTAAACCGTGTACTTAATAAAGTATTCAACCGCTAACTGTAAGTGTATAGACTGG  
ATTTTTAACAGAAAATAAAAACGTGATGTTGGCGTCTGCTTAATACTAGGCTTATATTATAGCTAAGAGATGTGAG  
GACCGTTAATGTGCAGTATTTCAAATTAACAACCTAGCAGACCCTAAGAACAACGAAATTTAAACTGCAGCCACAAAAT  
TGACTGAAAGTATACAAATCGAAATGAGCTGAATGTAATTGTGCGAGTATTTTTGTAATGTATTGTCGCGCCGGG  
GGTCCCAGAACCGAAAATGACTTACCACACACCAACGAAATGTTAAGTGAAGCAATCCACTCAATTTATTTTTGTCT  
AAGCATAAGCAACGATGTTGAAGCATTTAAATGTATAAAATATTCAATAAAAAGTGCATTTATGCATCATGTATACAGT  
ACAACAT

**54. Gli**

AGTCTTGTTTTTGGTTAGTGATTTTTTGTGTTTACCTTTTCCGGGGCGTTGGCCAAGAAAGTTATTGTGAGTGTAGAAAC  
CGGTAAGGTTGAAACTAAAATATCATCATGATGCACAAATTGAAATATCGCGATAAATTAAGGCTTTTAGCCCTTC  
TTGTGCTGATCGGCACCTGTTTTTATTTCAGACAAGGGGACAAACAAGAGATCCAGATTTTTATTCTCGGCCAGGCGTTGAC  
TACCATTGGCCAAATCCAGGCGATCCGGATTACAGAACCTACACGTTCAACGATCGCCGATATGGTCATTATCAGCCAAA  
TGGCTATGGAGCCAATATCCAGGCAGAAATCCACCGGGACAATATCCACAGGGAATGCCGAATGAAGATCGCTTTTCGAT  
TTGACCCGAACGATCCGAATGCGAGAACCAGTTTCCGGGAGTGTGCTGGCCGGATGGCGAGAGGATTTGCAGGGCAAGCAG  
CGGCGGGATTCGTTGACCCTGGAGCGGGATGTTTTCGTGACCACCAACTATGGCCAGGTGCAGGGCTTTAAGGTGTACAT  
GTACGATAATCCAGATCCGAAGTCTTCTATCGTCCCTACCCTCGACCGTGGATCGTGTGATGGGCGAGTGTCTCGGTCT  
TCTGGGCATTTCCCTACGCCCTGCCGCCACCTTCGAGGGCAGGTTCAAGCCACCACGCGTCCATCGAGGCTGGCAGCTG  
CTGCAGGCCGTCGACTTTGGACCCGCTGTCCACAGCCTGTGCGATATACGGGTGCCACGAAAGGAATCATGGACATGGA  
CGAGGATTGCCCTACTTGAACGTGTATTGCGCGAAGACTGGTGTGCTGGTGTGCTCAAATAACCCGGTTATGGTGTACA  
TCCATGGCGGCGAGTTCAATTCGTGGAGCCTCCAACCTATTCCAGGGTCATATTCTGGCCTCGTTCTACGACGTGGTGTG  
GTGACCCGTAATTACCGCCTTGGTGCCTGGGATTCCATCGACGGGTGATGAGAACTCGCCCGGAAACTACGGAATCCT  
CGATCAAGCGATGGCGCTACGTTGGGTCTATGACAATATTGAGTTCTTCAACGGCGATCGGAATTCATCACTCTATTTG  
GTCCGGGAGCAGGAGGCGCTCCGCTGGACTCCTGATGGTGGCACCACAGACGCGGAACATTGTGCGTGTGATCGCA  
CAGTCCGGATCGGCTCTAGCGGATTGGGCGCTCATCCAGGACAAGTATCGCGCCAGAACACGAGTCGCGTGTGGGACA  
GCTGCTGGGCTGCTCCATTGAATCGTGTGGAAGTTGGTCAACTGCCTGCGCACCGGACGCAGCTTCTATGAGCTGGGAA

ACGCTGAGTTCCTCTCCCCAGGTGGGCAGCTTTCCATGGGGTCCAGTTCTGGACCACAACCTTTACGTTGCCCGGCGACGAT  
TGGTACGAGGGATGGCGCGAAAAGGATTGGCGTTTTCTCACCCAAACGCCGAAACCCTCATCCGTGCCGGTAAATCAA  
CCGGAATATTCAGTACATGACGGGCGTGACCACACAGGAAGCGGCCTTTTTTGTGGCCAAAACGAATCCCTAAGTCCGT  
ACTATGAAC TAGATGGACGTTTTCTTCGATCAGAAAATAAGGGAACACGTTTTCCGCTACAAC TATACTTAATCCGAAC  
GGAGTTTACGAGGCCATCAAGTACATATACACCTTCTGGCCGATCCCAATAATAACACCATAATCCGGGACCAGTACAT  
AAACATGCTGAGTGATCTCTACTACCGAGCACCGGTGGATCCAATGGTCAAGTCAAGTATGCTGGAGCAGAAGGTACCCGTTT  
ATATGTACGTACTGAACACCACCTGTGGAGGCACTGAATCTGCCACAGTGGCGAAAGTATCCACACGACATCGAAGCTTAT  
TTCCTCACCGAGCTCCCTTCATGGACACCGAGTTCTTTCCAAAAGGAGCATCTGCAGCGCAATATGTGGACGGATAA  
CGATCGCAATATGAGTCACTTTTTTCATGCAGACCTACACGAATTTTTGCTAGATATGGCAATCCGACGCCGCAACAGGTGC  
TAGGCATGCATTTCCAGCGCGCATAACCAGGGCGAGATTCCGGTACTTGAACATCAATACCACGTACAACCTCTCCATTCTA  
CTCAACTATCGGCAGACGGAGTGC GCCTTCTGGACGCAATACTTGGCCACAGTTATTGGAGTGCTGGTGCCACTTATCC  
ACCCACCACGGAGTATGGTGGGAGCCCAAGGAGCCACTACAGATCGCCTTTTGGAGCATGTCCGGTGGCCTGTTTCTTCC  
TCATAGTCC TGGTGGTCATCTGCTGCATCATGTGGCGCAATGCCAAGCGCCAATCGGATCGCTTCTATGACGAAGATGTC  
TTCATTAATGGT GAGGGCTTGGAAACCGGAACAGGATACGCGTGGAGTGGACAATGCCACATGGTGACCAACCATCATGC  
CCTGCGCTCCAGGGATAATATCTACGAGTACCGCGACTCTCCATCCACCAAACCTTGGCCAGCAAAGCGCACACGGACA  
CCACCTCGTTGCGCTCACCCAGTTCGCTGGCCATGACCCAAAAGTCCAGCAGCCAGGCGTCCCTCAAGTCAGGGATCTCG  
CTCAAGGAAACCAATGGCCATTTGGTGAAGCAATCTGAAAGGGCAGCCACGCCACGATCCCAACAAAATGGGTCCACCGC  
AAAGGTGGCGTCTCCTCCTGTGGAGGAGAAGCGTCTACTGCAGCCACTTTCCAGCACGCCCGTGACGCAGTTGCAGGCGG  
AGCCGGCCAAAAGAGTTCCCACCGCTGCCAGTGTCTCGGGCAGCAGTCCGGAGCACCCTCCGGTGCCTCTGCCCGCAGC  
ACCACCACGCACACCACAACAGCCACCCTGAGTTCCCAGCCAGCGGCTCAGCCGAGGAGAACCACCTGGTGGAGGGAGT  
GCCCTCAGACATCCGTATAAAGTAACAGCTCTCTAAGCGCAGGATGCGCTTAGGGAGTCAGCCGAATCGTCCAATTACAGAG  
CCAATCAACAATCCAGGAGGAAGTATGCCAGTTTTCTCCTGGAATTTTTCTTTAAAGTAAGTTAGTTATTTTCGAAAAAAG  
TAGTTTATGTTTTGTATTTATGATAGGTTTGTAAACAGATCTTTGAGATCTCAGTTTTGAGTTGTAGTTTAGGCAAACCT  
GTATTTCTAATGCCCTTACTTTAAGTTAAATGTTCGTAAGTTTGATAACCCAAGTACAAATCAAAATCCATATCGAATGACAT  
CCATAGCCTTATCATCGGCTTTTACGTGTATATAGAATTTAAATGTATAAATAAGAATTTAAATCTAGGAAATGTC  
CTGCCTTAACTGAAGGAAATTAGCTATATAATACAAGTATTTTTATAACAAAATGCTGAGCTTAAATTTTTAAACTCACT  
TTTAGTGGCAGTAATATCGAATGAAATTTGTAAGAGAGTATATCTTTTAAATCAAATATTTAAATAACAAAAATAAATTA  
CCTTATAAAAAATAATGCATTACATTATTTAAGACCTGCTATTATTTGATAACAAACTCATAACATTGTCACGTCCCGTA  
TTATAAGAATATCATTAGAATACCATTAGATCGTAGCCACTCCCACACATCATCAAGAGCAATACACCTACAGTGCCTTA  
ATAATATTTGGTAATTTGCTCCTCGATGGACCCACCCACCCCATCCATGATGTACCAACTAAGTGTGCCTTTCATACATACA  
TAAATGTACTCCTAGTTATATACTATATATGTTCTATATGTTCTGTGTGTCGCATATAAGCAAATGA **CCATACAAAATC**  
**AGTGTGAA CCGTCC** AATAACTTATGTTTTCAAAGTGTACATTGTTTTCTGTATATATCATCATTTGTTACACGATTG  
AAAGCATATGTTTTTACCACATTATATGTTTATATGTACTTTAGATAAGTTTTATGTATTTGTCCATAAATAAATATTT  
TTACATTA

**55. NrX-IV**

TCACGGTCACACTGGCAGCGAGACATTCTGTTCTGTGTGCATCCGCGTTGCGATAAATTATTTTCTTAATTCAAACGAAAC  
TCTTCCGAAGTGGGCGTGATCTGCTGGAGCCGTACACCCAGTGGATAAATTACATAAAATTCAAAATCGATTTAAAGCGGA  
GCGTAAAGTGCAGTCCAACGTTTTTAAACACCGCGGACGCGTTGCCACAAATCATCAGCTTTTTACGGTGGTTTTTCCAGC  
GGAAAAGTGCATTTTGGTGTAAACTTCTTCGAAATCGAATATAGATGTGTTTATAAATCTACCAAGCGATAGTGTTTA  
ATTAACAGCCTCCAAGATGAGGCCGCCAGGAGCAATACGAAAGCAGCATTTCCTCGCTTCAGTTTGGATTGTTATGCC  
TCCATATGCTGGTCAATAATGGCATTAAATCGGTGCAAGCAGACGCCTTACGGACTATTTCTCCGACTACGATTGCAAC  
CAGCCGCTGATGGAAAGAGCCGCTCCTCACGGCCACATCATCTTGCAGGAAAGAGGACCCGACAAAGCAGCAGCTAAACGG  
TAACGCTGCTTGGACACCGGTCGAGAATACCTATAACCATTCTTAACACTCGACCTGGGAGATCCCGCGATGGTGGCA  
AGATCGCCACCATGGGACGCATGCATACGGATGAGTTCGTGACGGAGTACATTGTCCAATATTTCCGATGATGGCAGATT  
TGGCGCTCC TACGTGAATCCTACGAGCGAGCCGAGATGTTCAAGGGCAACTCCGATGGCAACTCTATCCATTACAACGT  
CTTCGAGGTGCCATTATTGCCAATGGGTGAGGATCAATCCACCAGGTGGCAGCATCGTATTTCCATGCGTGTGGAGC  
TCTACGGCTGCGATTACATCTCTGAAAACCTATACTTTAATGGCACTGGCTTGGTGCCTATGATCTGAGGCGGGAACCC  
ATTACCTCCACCAAAGAGTCCATCCGCTTCCGCTTCAAGACGGCCTTTGCCAACGGAGTGATGATGATTTCGCGTGGCAC  
ACAAGGGGATTACTATGCCCTGCAGCTTAAAGACAACAAAATGGTGTGAATTTGGATTTGGGATCGCGGGTGTGACCT  
CCTTATCGGTGGCAGCCTGCTGGATGATAATGTGTGGCATGACGTTGTGATCTCAAGGAATCAAAGGGACATAATCTTC  
TCAGTGGATCGTGTATCGTAAGAGGACGCATCCAAGGCGAGTTCACACGACTGAATCTTAATAGGGAGCTGTATCTAGG  
TGGTGTGCCAACGTACAAGAGGGCTTGATTGTCCAACAAAATTTCTCCGGCTGCTTAGAAAACATCTACTTTAATTCGA  
CCAACTTTATTCGAGTGATGAAAGACAGCAGTGAACCTGGGAGAGGGATATCTCTTCACTAGGGTAAACACGATCTACGCG  
TGTCCTTCGCCCTCCGATTTATCCGGTGACCTTCACTACCCGTTTCGTCGTTTCGTTGAAAGGGTTATGAAAATTCGCA  
GCGTCTTAACGCTCTCCTTCTATTTCCGTACTTACGAGGAAACTGGAGTAATGCTGCATCACGACTTCTATTCCGGTGGTT  
ATCTAAAGGCTTTTTTGGAGTTTGGCAAAGTGAATAATTGATCTTAAAGTCAAGGACAAAGCGCGAATCATTCTGGACAAC  
TACGATGATCAGTTCAATGATGGCAAATGGCATTTCGTTTCGTTATATCCATCGAAAAGAATCGCTTGATTTTAAATATTGA  
TCAGAGACCGATGACCACAACAAAGAGCATGCAGGTTGCCACTGGAGCACAGTACTATATTGCTGGTGGAAAGGACAAAA  
ATGGATTTGTCCGTTGCATGCGCTTAATTTCCGGTGGATGGAATTTACAAATTAACCGCAGGACTGGGTGAAGGGCGAGGAG  
GTTTGTGCTGGCGATGATGTCGTCGTCGATGCCATGCCAGATGATTGATCGCTGCAACCCGAATCCTTGCACGATAAGG  
ACTTTGTACCAAACCTCCAGGGAGTTCTTCTGTGATTGCGGACATACTGGCTACGCGGAGTGTGTTGCCATACATCAA  
ACAATCCATTGTCCTGCTTGGCTCTCAAGAATGTCCAGCATGTGCAGCAGCGTGTGAACCTTGAATCTCGATGTGGATGGC  
AGTGGTCCCTTAGAACCTTTCCAGTGACCTGCGAGTTCTACTCGGATGGACGCGTGATTACCACCCCTCAGTCACAGTCA

AGAGCACACCACAACAGTAGATGGTTTTTCAGGAGCCTGGCTCCTTTGAGCAGTCCATCATGTACGATGCCAACCAACTGC  
AAATTGAAGCTCTGTTGAATCGGTCTCATAGCTGCTGGCAGCGCCTGAGCTACTCCTGCCGCTCCTCCCGACTCTTCAAC  
TCGCCATCTGAGGCCGAAATTTCCGTCCCTTCTCTTGGTGGATATCTCGCCACAATCAACCGATGGACTATTGGGCTGG  
AGCTCTACCTGGCTCTCGTAAGTGCGAATGTGGAATCTGGGCAAGTGTACGATCCCACAAAGTGGTGAACCTGGCATT  
CGAACAGTCTGGAATGGATGGAGGATGGTGGTATATCCGGGAGAAGGAATACCTTCCCGTGGCAGCTGTGAAGTTTGGC  
GACACTGGAACCTCCGTGGACGAGAAAATGGTGCCTATACTCTGGGACCCTGCGCTGTGAGGCGGATGATCTGTTTTCAG  
TAATGTGGTGACCTCCCGATGGCCGATGCTTCTATTAACCTTACCACCATTTCGATATGGGTCACTCTGGAGATATTTATC  
TGGAAATCCCGTACCACACAAGAGAATCTGTGATCTTCCATGCTACCGGACCTACAGATTACATTAAGCTAAGTCTCAAT  
GGCGGCAACAAATTCGAATTCAGTATCAGGCGGGAAGTGGTCCACTGGGCGTTAATGTGGGCACAAGCTATCACCTGAA  
CGACAACAACCTGGCACACGGTTAGTGTGCGAGCGCAACAGGAAGGAGGCTCGTCTGGTGGTTGATGGTTCTATCAAGGCTG  
AGGTTTCGAGAGCCGCCGGGTCCAGTGCCTGCACTTCACTTAACATCGGATCTGGTGGATTGGCGCCACTACTGAGTACCGC  
GATGGTTACGTAGGATGCATTCGTGCACTGCTGCTGAACGGAAAGATGGTTGACTTGAAGGAATACTCCAAGCGTGGATT  
ATACGGCATCAGCACCGGTTGCGTGGGTGCTGTGAATCAAATCCATGCCTAAACAATGGTACTTGTATCGAGCGATACG  
ATGGCTACAGCTGCGATTGCCGTTGGAGCGCATTCAAAGGACCTATTTGCGCAGATGAGATTGGTGTCAACCTACGCTCC  
AGTTCGATTATTCGCTACGAGTTCGAGGGTTCCCTCCGCTCCACAATTGCCGAGAACATTCGCGTGGGTTTACCACCAC  
CATTCCGAAGGATTCCCTGCTTGGCTTCTCTTCCAACCTAACTGGCGAATATTTAACTATTCAAATATCGAATTCCTGGTC  
ATTTGCGTTGTGATTTGATTTCCGTTTCGAGAGGCAGGAAATCATATTTCCCAAAAAACATTTTGGCCTGGGTTCAGTAC  
CACGATATGCACTTTATGCGCAAGAATGGTGGATCCACAGTGGTTTTGAAGGTTGACAACCTACGAGCCGGTTCGAGTATAA  
TTTTGATATTAAGGCCCTCAGCGGATGCTCAATTCACAATATCCAGTACATGTACATTGGCAAAAAATGAATCTATGACAG  
ATGGCTTTGTGGGTTGTGTGTCGCGAGTTCAATTCGATGATATCTATCCACTGAAGCTGATGTTCCAGCAGAATCTCCC  
AAGAATGTCAAATCATTTGGGCACCTCAATGACTGAAGATTTCTGCGGAGTGGAGCCAGTTACGCATCCGCCATTGAAAT  
CGAGACTAGGCCACCACCCTTGGTGGATGAGGAGAAGTTCGCAAGGCATAACAATGAAGTTGACTCTGTGCTGTTGGCAT  
GTCTGTGTGATTCCTTCCCTGCTGCTGATCCTTATGTTCTTCCCTTATCCGTCGCTATTTGCACCCGACACAAAGGCGAC  
TACCTGACGCACGAGGATCAGGTTCCGATGGAGTGCAGTACAGCATCCAGACGATGCTGTCTGCACTCAACTCACTGGCCATCA  
AGTTCAGGAACGCAAGAGATCTTTATCTAAACCGGTCGCAAGAATATGCACATAAATCGTTTTTAAATCGCCTTAGGCA  
CGCAACAGCGACCCTCAGACACACCAAAAGATAAAAAAAAAAATAGATGAGAACGAAGTGAATAAATCAAATAGACACGGAA  
AAGGCTCACCACGCATAACAGACAGAAAATACTTTTCCATGCACTGCCAATTTGTTTTGCGCAAGTAAATGCTAAGATTTG  
ATTTATAATTTGGTTGGCTACATTTTGCACCTATGTTTTTTTTTTTTAGTCTTTGGTCTGTCTGACGGCATTATTGAAAT  
TCTTCTATCACAGAATA **CCGTCCATTTTTAGTTAATTTT**ATGAACTTTTTGTTTGCAAAATTTGAGTTAAAACTTATTTA  
AGGGAGCTGCCCGAGTAGCTCAACAAAAGCCACCTATTTTATGTATTTCTATTGCGCGAGTATGTAAGAACGAACATTCC  
ATTATTTTTAATATGTTTTCTCGCTTTACGTTAATTTAAAAATGTCTTCTACTTTACACACAAAAGAACATGAAAATCA  
TTTTGTGGCTAAACAAAATCGGCTACTTTAGTAACACAAAGCATTAAAAACAAATTTGATTTTTTGGAAAATGCATTTTGA  
ACGCTTTGACTTGAAATTTTTCAAATATACATTAGCATGTGTATATAGATATATATAGCAATAAAAAAATATATATAATTA  
CAAAAAGAGACAATGAAAAATTTAAATTTTTTATCTTTCAATAAAAAGAGAACTACAAAT

**56. Lac**

ATTCATTGTTTTCGCGACTTTCGAACTGTGAAGTTGTCTCTCCGGCGCGTTATCTCCGTCTTGGCCAAAACCTCGTGACTG  
ATCGAGAGAAGAAGTCTGAAACCAGCTCTGAGCGAGAAGACAAGTGTGGAGACTGCAGTTTCAGCATCCGCGTTTTGCTGTG  
CTCAAGAAAGAAACGGCAATAGTTGTCTTCGGTTTCTTGGAGACGTCTTCGCCGCGCTCTCACCTATTTGGAGAAGATT  
GAGATCTTGGAGCGCAGCTCTTGAGAAACACTACATATATAAATCGCGCGCTTGCAGGGTGTGGTGTCAAAGTCAATT  
CTAAGATGTGGCGGCGAGTATCTCGAATTGCGTGTGGAGCACCTGCTCTTGGCCATTTTTTGTGCAAGCAACAGCTAGC  
ACAGCGAACCCCGACCATATCTTACATCAGCAGGAGCAGATCAAGGATATCGGCCGACAGTGGAGTTTCGATTGCTCCG  
**TCCAGTATGCCAAAGAGTACAACGTGCTGTTCCCTGAAGACGGACAGCGATCCCGTCTTCTCTCCACGGGCTCCACGCTG**  
**GTCATCAAGGATTGCGCTTCTCGCTGCGGTACGATCCCAACTCGTCCACCTACAAGCTGCAGATCAAGGACATTTCAGGA**  
**GACGGACGCGGGCACCTACACCTGCCAGGTGGAGTTGCGACCAGTGCATACCCTGCCGCGTCTCGTTTTGGGACAGGCTC**  
**TGCAGTACGACATGGACTTGGAGTGCCACATTGAGGCCTATCCGCCACCGCCATTGTGTGGACCAAGGACGACATCCAG**  
**CTGGCCAACAACCAGCACTACAGCATCTCGCACTTCCGCCACCGCCGACGAGTATACCGACTCGACGCTCCGTGTGATCAC**  
**CGTTGAGAAGCGCCAGTACGGAGATTATGTGTGCAAGGCCACCAATCGCTTTGGAGAGGCGGAGGCGCGCTCAATCTCT**  
**TCGAGACGATCATCCCGTGTGCCACCGGCCTGTGGACAGGCGTACATCGCCGGAGCCGAGGATGTGTCCGCCACTTCG**  
**TTGCTCTTGTGGGCATCCTGGCGGCTTGTCTTTCGCCAGATAA**GCCAATGGGCCCACGGCCGTCGACTCCAAGCGCTT  
CAGGTCCAATCCATCAACCAGCCCTCGAATGCATAAAACATATATAAAATAGATATATCGAAAACAAACATCGTGTAACC  
GCGCAATAGATGTCTCAAACGATTTCCGACACACCAACCCACATCCAGTTCTCAGTTGTTTTGTAGCTTCTGCTTCCGT  
TTCCGTATAGTCCAGCCCAATTTTTGTACGTCCAATATTATGTCTTAAGTTAAGTATGATAAGTGAAGGGCCAACGATAA  
CTAGACTATAATTTATTAGCACCTAGAGCCGAACCTCAAACCGAAATTAGACTCCAGCCCAGCCGTAACGATGCATTT  
**ACTTGATCCCGTCCGTTTGTCTTCTGATCTGGCACTGTATATGTTTTAAATATTTTAACTAAGCAAGATACATCACA**  
AGCATTCGGATTTTGTCTCGACAATTGAGAGGATATTTATTTTTATTTAATAATAATAAAGTATTTTTCGTTACGCAAC  
CTATCAGCTCGACACACTATCCCTAAATAATATCTCAACCCCATAAATCGAGGCCAAAATCCATATTCGAATAAAAGGCA  
ACAAAAGTTGTGTACATTATTAGCTCATAAGCACAAATGAGAAATCTTTTTGAATAACAAGACATTTTTTACCCTAAATTTTT  
GTGTGGTGTGAGTAAAATCAATTTGACTTTGTAAACAAAAAAGACAAAACGAAAACTAAAATTAACAAAAA  
AAATGAATAA

**57. santa-maria**

ACAGTCGCATCGAAGCCGCCGGGCGAAGCGGTACCATTTTACGGCATTTCAGGGACTCGTGTCCACTTTTCCGGCCTC  
TGTGCAAAGAAATCATCCACGTGCTCAAGCGTTCTGTCCACATCCTTATCGAATTTCAATTTCTCGCAAGGAAAATCAA

AACGTAAAAAAAAAACCGAGGAGCCTGTGATTTGTTTCTATTTAGCAAATAAAAAGTCAACCACCATTAGGTATCCACACA  
CCATCGCCAGCGTGAGCCATGCCAACACAAAACAGCGCAATGTGGGGCCAAAAAGTAATCGCAAATTAATTATCGGCA  
TTTTCGGCTTTTGCCTGGGACTATTTGGCATATTTGTGCGGCATGTTCTGGGTGGACCTGTTTCGATTGGATCATGCACAAG  
GAAATGGCTCTGGCCCCGACACACGTGTCTATGAAAATTGGAAGAGTCCGCCAATTGATCTCAGTCTGGACATCTACCT  
GTACAACGGACGAATCCGGAGGATTTCCGGCAACCTTTCCACAAAGCCCATTCTGGAGCAGGTGGGTCTTATCGTTTTA  
TCGAGCGACCCGATAAAGTGGACATTCAGTGGCATTCCAGAAAATGCATCCGTCACCTATCGCAGGCGCAGCTTGTCTAC  
TTTGATGCGGCGGGCAGTAATGGCAGCCTGGACGATGAGATTACCACGCTTAATGCAGTGGCTGTCTGCAGCCGCCAC  
AGCCAAATATTTGGCCACCAGTTAAGCGCTCCCTTGTGATGTGGACTAAAGATGTACGGTGCCGAGATGTCTGTCCAAA  
AATCGATCGATGAGCTGCTCTTACCAGGTTACAATGACGCAATGATCGACGTGGCCATGGCCATGCCCATTTTTTGGTGAT  
GAGGTGAAGGTTCCATTTCGATAAGTTCGGTTGGTTCTATACGCGCAATGGAAGTGCCGATCTTACCAGGATTTTTTAATGT  
CTTCACTGGCGCCGATCAACTGGCCAACTGGGTGAGATGCACCTCGTGAATACCAGGAGAACTGGATTCTTTGATT  
CCTATTGCGGTATGACCAATGGATCCGCCGGGAGTTCCAGCCACAGCATCTGAAGCCCGGCGATAGTGTGGTCTATTT  
ACGCCGATATGTGCCGAATATTCGGCTGGATTATGTGAAACTGTGGATATTGAAGGACTGGAAGGTTATAAATCTC  
AGGCGGACCACGATCTGTAGATAATGGCACCAGTATCCTGAGAACCTTTGTTTTTGTGGTGGCCAATGTGTTCCGTCCG  
GTGTGATGAACATCAGTTCCTGTGCTTTGGATCTCCTGTTTTTATGTCTATCCACACTTTTTCAACGCCGATCCTTAC  
TACCCAGATCAGGTAGAGGGCTTGAGTCCTAACCAGAAGGATCACGAGTTTTATATGGTTGTGCAGCCAAGTACTGGTAT  
TCCCCGGAGGTGGCTGCCGATTTCAAGTGAATATGCTCGTGGAGCCAATCCAAGGCATTAGCTTATACACTGGAATAC  
CAAGGATATTTTTCCACTCGTATGGTTCGAACAGAAAGTAAGAATCACTCCAGATATGGCAGATCAACTGAAGGTGCTG  
CCCATTGTCATGCTCTCCGGACATATATTCGCCGGAATTTGCTTGATCGTAGGCATAACTCTACTCTGCTGGACTCCGGT  
TCAGATTCTATTGGCTTCCTGTGAAATCGTAGATACGATCTGAGGACCAAACCAAACGAATGGCCAGTATAAGAGTC  
GCTCTCAATTCCTCAGTGTGAGGAACGAAGTCCAAGGCCTCCACTTTGGTGTGCGAAAAGAGTGTCAAAGGATCTCCG  
GACAGTTCCTCCGCTCCTCGAAAAGGCCGTAAGCCAACCATTTAAATCCCAGACGGGTGAAAGTGTGGCCACTGCATC  
CACAGCCATCAGCGACAATAAGCAGGATTGAACAGAACCGCCACATTCAGCCATTAGATAAGTAAAGCGTCTAGTGC  
TTTAGTCGTAGCTCATAGTTTAGTGACACTTAAAACACCCAATGAAAATTGCAAGCATTCCCGTGCCTATGCCAAAGA  
TTAGATAGCCTTCGAAGTCGAAACGTCTGGTGGACTTCGCTTAGCTAACGAATACTCTTTTACATTCCTTAGTTATTAG  
ATATGTTTTGTATTAATAATGATTTCTTGACCCATGGCTTTCGTGTCAAATAAAATCTTCAACTAC

### miR-184 MREs in long non-coding RNAs

#### 58. lincRNA.924

CGCCATCATGCGTTGGAATAGTGAGGAGCTTGCCTTTGCCGTTGAGGCCTACCTTTCAAGCCAGTGTTCGGTTATTAAAA  
CACAGCGTGAATTCGGAATCGCTTTAATTTAGCCCCGTTTGTCTCGTCCCGGACCGCAAATCAATTGTTACGTGGGTC  
ACTACATTCAGGCAAACCTGCAAGTGCACAAAGAAGTGGAGTCCCTCGACCGATCGTTCTAACGTGACTATCTCAATTAG  
AGGTGATTTGGAATGGCCGACTCTCCCGATCTGTCCCTCGTGATTTTTGAAATCCCGTGTGTTGTTGGAACCGTCCAAG  
ACCCTACAAGATTTGAAAACCAACATCCAAAAAGAAATTGCCAACATAACACCTGCTATGCTAACAGAGTAATGACAAA  
CGCCAGAAATCGGCTTACGCAATGTATGATGAATGGGGGACGTCACCTATAAGATTTTATCTTTCAAAAACAATATAAATAA  
AACTTTAGACATGTACCTACATTATAAAAAATAAATAAATTTTTCCGATGCCTACAATAGTTTTT

#### 59. lincRNA.218

GTTTAATTTAATCGCTTCATATGTTGTTTAAAGCCAAGTATTTAAAAAATATATAAAAAAATTTAAACTAAATTTAAAA  
TCAAGCACCGGATTTTTGCTTGAGTGTGACCTTGTGTGCGATCTACCGCTGAGTGTGGCCGGGCTTGATTGCATGG  
CCTTCGTCTTCGTCTTGGTTTTGGGCTTAGTCTTCATCTCCATCGCCGTCCATCGGCATCGTCCATCTTGCCGGAACAT  
TTTGTGTGGCTTACTCAGTTTTCTGATTAACAATCAATCAATTTTCGCGTGCGCCATCTACTGCTGCTCCGATGAATGAATC  
GACTTTCGGCCTCGCATGCGTCACTTAAATTCAGACAGCACCAACCGCAGCCATAAAGGTTATCGAGGGAGGAAACCATC  
GGGCCACTTAGTCTTCGCCAGGCTCCAAAAGTTGCCATCAATCAACGCGGAAAGTCCGTCCAAGGATAAGCAAATGACG  
GGATGCAAGTGAATCCTCAAAGGGACGACAGGTGCCAGGTGGCGGGATGTAAGGGGCAAGACCCACCTCAACCCAAATG  
CCGCTTATTTATGCAGAGCGCGGGATGGGCGAAGCCGCAAAGTGAATTTAAATGGGACCCATAACCCAAAACACTGAA  
ACACCGAATCACCAGAGCTCTGAAACCATGAATCCGAGTACAGGCCGTCAAAGCTCTGTTGATGTAGTCGTTCTCGG  
ATGTTGTCATGGGAGCTCGGCATACCTGGGTGAGCTGCGTTGCCGGCCATTAACACACGTTGCTAAAAAGAAAACAA  
AGTGCAGCCACATGGTTAACTTTTCCATGCGATTGGAGAACACAGTTAATTTGAAAAGAGTAGCAAAGACAGAAAAAAGG  
GATATGTATTAATTTACGGCTACGATAAACCCAGATTAG

#### 60. XLOC\_001425

TTATATTTTATTTAATTTTTTATTTTACTTCTTTTTTTCCAGTGCCTTGCCCTTTCGTTGGATCGTTTTTCACTTT  
GCCCAAACCGCAAGCCGGGAAACTTTTCGCACCTGTGTGCAATGACCAAAAAGCAGAGGCAAGGAGCCTGCAAGTTAGACC  
ACAACTTCCTCGTGCAGGACGATGTAAAAAGCCGATGTCTAACCTTTTTTTTTTTGCTTAATTGCGGTGCCAGATCA  
TAGCCAATCCGTCCGTCCGTGGTGAACAAAGTAAAACGACAGGAGTCTGCAATCCGGATCCTGTGAATTCGAGCCGGA  
GTCAATGGTTGTATATCGCTTGATAAATTTATCGTAACTGTAACAGTGCAGCATGTTTTCAGTTTATTAGGGGACACTTTG  
CGACCTTAACCTTCTATTCCATGGACTGAACTACGACGAGCTACATGTTCTCTGTCCATATGCAAAAATAATGCCGAT  
CATTAGTGCCTCGGTGAC

#### 61. lincRNA.678



GCCGTACATGATAGTACAATACCATTAGATCGCATATCTACTTACAAGAACTAATAAGACTTTTGTATTTTATTATCTCT  
TACAACCTTTCCCTACTATAGCTAAAGGTTAAACTTTTTAAAGTAAGGATGGTGTGGTGAATACGCATATAAAATAGGCGAGCT  
GGCCAGTGTACAAGGAGCCCTCTTCGAGGGGTCCGCTGATGAGGGTCCGCGAATGAGCTGTGGCTGGAAGCCAGCGCATC  
AGGCTCGTCGGTTTTGGGGTTTTCGTTAAATGCAAAGTAGTGTGACACATGCAAAGTTTTCAGGTTCCCAATGGTTCGGGGGAG  
GTGGCAAACAATGTGACCGCATTTTAGTCACAGTCACTCGGGCACAGACGTTACATTTAATTCAGAGATTTCCGAG  
CCGAGCCGCTGCCCTCCACGTGAAGTGAAGATGAGTGCAGGGTGAAGTGGAAACGGTTAGTGCAGAAAGGCAACTCG  
GGAGGACTTCCCGTGGATGGATGTGCGTTGCTGGTTGCTGGTGTGCTGCACTGCAGCGGGCATAATTTAGTTTCTTC  
AAATGCTTTTTTACTAAGCACAAACCATCAAACGCAAATACACACTGGAAAACGATTTACGAAAAGCTGGACATTTGCAAGTT  
GGGTCTATGGGCATTACATGTACTGTCTGATTAGTCCATATTAGTGCCTCCTTTAATGAGTTTCATCAGAGTCGTCTTAA  
GTTACCAAGTAATAATCTATACTATTAACACAGTAACCTGCCTATCAAATGTATCTTCAACATACTATGAGATTACA  
TACATGTACAATATGAAATTTTTGATCAATTCGAGACAGGTTGACACACTGCTTGTACTCTTCCGCTGGTTTCTCCCAG  
TGTATTTCTGCTGCTTCTGATGTTTCTTGTGCTGGCATCTCTGGTCTTGTGGGTGCTTTTCGGTTGCCGCTTGTGGC  
TCTGCTCTTGGCACTTTTCGACATCAGCAACGTTGCCGTTGCTGTTGCTGTTGTTGTTGCCAGTCACTGGTTGGCATCGG  
CAACGGAACAAACACAAATACACACACTCGAACATCCGCTCACTACGGGGTGTGGTGGAGCGAGACGGGGGTAGGGAAA  
CACGCATGTCGCCGATAAGTGTGTTTGTGCTGCCATATATAAAATTATTACTTTTCGACATGCAACTGCAACAGAAACAAC  
GACTTGGGCCCTCGCTTCTCCAACCTCACATCGCACATCTCGCATTTCTGGGCAGGAAGAGCCGCTTTGCATCCGATGGATG  
CCGCCTGACCGAATGACAGATACGCTGTCATTGAGTTGTTTTCCACACTCAGAAAAAGATTTGTGTGTT**ATCTGTCTCTCA**  
**TTATAAAACAGG**TTTCCCCACTTAGTGCTTCGATTGACGATTGATATCACACAATCAACACATTTTCTTAGAAAAATTTA  
ATTCATTATAATGTTATCGATTTAAGGAAAAATATTTCCCCACGCGTCATAGTTTTGACCACCTTTCTGGGAATTTCCAGTT  
TTATGAATTTGTTTCGTTCTAT

**62. lincRNA.903**

CACGTACACAAATCGCGCGAGATCGAGCATTGCATATAGTATAGTGTAGTATAGTATATCGCATTGACTTGGTAGACGGG  
CAGGCAATAAATTAATTTTTCTCTCGGCTGGCGAAAAAGCCAAACGCTGAAAAACGTGAAATGCAGCCCTAATCGAAGG  
CGAAGTGGGTTTTCCCGGATTTCAGCGATCTCTCCGCTTTTACCCTTTCCCGAGCGAGGCACAAATGAAGCGCGCCGTG  
TGCCACACTTTTCCACCGAAAGTGCAAATGCGTTTTCCAGTTTTATTTTCAAATGTTCAATTTCAATAATTTTTTAATGGC  
CTCAACGCACGCACGCACGTCCAGGCAACTCTATAAGGCCCTGCTCCCTACGATCCCCAACCCACACAACCGATCCGTTT  
CGATCCCATCCCATCCGATCCGAGATGAACCTCAACCGATCTGAACTGAGCCGTTTGGCCAATTAGTCGAGATGTTTGCAC  
AAATGCCAGACAAATGCAGACGAGTGCAGGGCGGCATATAAAATTTCAAGCTCATCGCGTCCGATGGGCGCCATTGTGCAG  
ATCATGATCCTAATGGGGTTGATCTGTTTAAAACACCGGAAACAAAAAGGGTTACATCTTGTCAAAGACCTCTTTTTT  
AGTCATTACATTATAATCTCTAAATAGAAACGTAACAATTTGGAAAAAATTGCTGAACAGTGCAGATTTGTATCTGCG  
ATCGGAATGCGCCTCGATTATTTGTTTGTACACGGGCTTCAAAGGAGCGTGGCCAGTTTTATATCCCATTTGCTAGATGCA  
TTCGCTTTGACATCTCAAAGCAACATAAACCAGGCAATCGGGCAGGGAAAAACACCTTTGTGCCGACACCTATAAAAAATGT  
CCGATCTTTACGATCGTTTAGCCCCACCAGTCAATGGCAGACCGGGTTTTATATGGTTCGGGCGACTTCCACGAATTTCA  
CGCCGAAATTTAGAGTTCGGCTTTTGGGGCACAACAATGTTGCCAAACATTAATAATATGAAAAATTCACTTAAAAACG  
TAAACAACACGGACTCGTCT**CCGTTCTCCGTTCTCTCTGGGCT**CCCCATTTTCGACATAAAATCATCCACTGAAAAATTGAA  
AATGAAAAACAGAATGGCAGCAAAAAAAAAAAGCAAAATCCGAGTGTCCAAGGCGGCAACCGCTTTACGATCGATCGT  
TAAATAAATTTGGCAAATAAATGTAATGAGGCATGGTCAGAATGAACGGCCGAACCCGCCCCCATCCCACGACTGCATC  
CATCAATGGCGATTTTGGCGGAACAATCCGCCGGACATTTGGCGAGTTCAGCCAAACAAATGGATCTCGAACGACGCTG  
TGAAATGTGAATATAACTGAATTTGCATATCATGCAAGTGTGGGCATTCGCATAAATCACAGCTCTCAATGGGTTTCT  
TTGAAGAATTCAGTCAGTCAGTCAGATGATGATGATAAATAGATGCCTTATGGGGCAAGGATCGATGTACTACTGACT  
GCTGAGCTGATTGGGTGGAGGTGATGGCAAGGTTTAGATTTTGTAGATAGATAGTTGTGATTAAGAGTGAATTTTATTG  
ATTGTTGATAATTTTTGTGTAATAAACGGAAGTGATA

**63. lincRNA.677**

GGCGGTACGATACACATACATATCAGCAGTATCTGGCCTGGTTGAAAACGGCGGGCCACACGGACAGATCTCGTTCATTT  
CATCTTCGCTGCTGATAACCAACAGCCGCTATACGACGAGACAGGAACGTGGG**CTGCGTTCTGTCCGTTCCGTTTGTCC**  
GCTTGTCCGCTTGT**CCGACCGTCCGTTCCGGCTGTCA**GTCCGCTCTTTGGAAGCCCCATCTGATGTGCGAAAAATAAATCCC  
CCAATGAATTTGGACAGTGCAGCGGGACACACCCAGAAGAAAAACACTGGCGGAAAAAGAAATCTGAAAAACAATTTGAAAG  
TGTTTGAACCTTATATTGACTTTGACTGCTGCTTACTAAGCTATGAGATGGATTTCTAGAAGACGGTTCGACGACAGGGTAA  
GTGGCTTCTTTCTTGGACTCCGACTGTTTTAATTGCACTTCGCTTAATTTGTCAATTAGCCTCTGACTTTGGCCTCCAAC  
CCAAAGGGCAAGAGTTGGGAAAGGCAGCGCCAGAGTGCAGGAGTCAATTCATCTTCTGTCAATTTATGTTTTCGCTGGTCT  
GCGGACTGGTCTATTGTATCTGGCAGGCACTTTGTCCAGCGGCGTTTTTGCAGCTTTTCTTTTCAGTATCCCTGCATTGTT  
CGATTTTAGCGGGGCAATTAGTCAGGCCAAGTAAATGATTTGCCAGCGAACTTATCCGATCCGGGTCCGCTGCTCCTGA  
CAACCTCCCAGCACATGGTTCGCAGTGTGTATCTGGCAGATACTTACGGGTAATGCGGATGTACACGCTCTG

**64. CR42874**

TGCATTGCATTTCGATGGGAAATGCAAGATGACTATGCGATACTCTTGAATCCTGGAACCTTGACCCGATGGCTTATCTTC  
TCGCCCTCCTGTTAGTCAACTACATTGATATCCCAGCTCTTGGGACGACTTCTCACCGACATGGCGTTGATAATGAGCCA  
GCTGCTCAATCGGAATCGAAAACAATGCTCGTCAGTGTGTTTGGTTTCGATTACGGTCTACAGTTCGCATTCGGATTTCGTA  
TTCGCATTCGCATTTCTGTTTT**CTGCTCTCCGTTCTTCTGAACAA**AGAATAGCCTGATAAGACGCCAAAAACAACCTGAAA  
CATCAGAAACAGCAGAAATAGGCGAAGTGGTTGGCAGTGGGTAGTGGGTGGTATGGGTGGCAGCAGCTGAAGCCAAAAACA  
CACTCACACACACACACACTCACTGAAATTTCTCCGGCCATATGGCCATATGCAAATAATGCTGGCGGGTGGAAAAGCG  
TGGGGCGGTTATAAGAGGTTGGTGGGTGGTGCATCAGATAGAATTATCCGCAGTGCCTAGCACGGGGATATTTAAGCA

AAGAAATCGCTTTATTACATTCACCTTTGCGCCACGAATCGCTTGAAATGCAATTCGCCAGTGATTCGGTGTCCGATTTG  
GGTTTCCTTTTCGGAGTGTTCATTTTTTGTGGCCTTAAAGACAGTTTGATCCGACTTGTGTGCATCTGAATGGTCCGATA  
ACTTGGGGATTCAACATGGTGGGAGCTATTTAAGAAGGTATAACAATAGAGCTACTAAAAAACAACAATCCTCTA  
TAGATCCCCTTAAGCTTTGATAATAGCACCAATCTTATAAAAAAAACTAGTCAGTTGATCAGACTTTTATATGGCCAC  
ATAATCCACAATCCTAGGCAGTGACTTTAGCTTTACCTTCCGGTTGGGGCTTCTGCGAGTCAGCTCTGCGAGGAAGGAG  
TCCGCTGGCTGCGATGTTTCACTTGATTTACATATGAATCCGCATAAAGCACGGCAGTCCGAAACTGCAAAGGAATGTGG  
GCCAAGCCCCCAGTCCATCCTCTTAACCCGCCGACGCCG

**65. lincRNA.484 (splicing site mis-annotated, excluded in the analysis)**

CTAAAATGACTTTTCAATCATTTCTAAAATATCATTGATTCTAAATCGTATACGTATCTTGGATCATCTGGGGACATTTG  
AGGATCCTACCTTAATCCCTGCTCGCATTTCATTACCCGTCTCCGGTCATTAGTCATTCCGGCAGGCAGATATGCAATTT  
**CCG**gtaattcgtactcgactagctttgcataaactctcaaccatattttccg**cttattaccaggTCCGGTCTAAG**TGCCT  
CTGACCCGATCCCGATCCCGATCGCGATCCTGAGGACAACGACGACGACGACCCTCGACGAGTGTGACTCAGGCAATTAG  
CGGAGGAAGTGAGTCGAGGAGTTTGGGACAGCAGACGGATTTGTGTCTATTAGCGCACTCGCGCAGCTCGCCACTTGTGTC  
CG

**66. lincRNA.490**

CAGCATTTAAGGATTGCCGTTTTTCGATTCAAATTATCTGAACAAAGCAATGTCTCAAGTGGCAAGGGTAAGGCACGTAAA  
TAAAACGAGGAATAAAATCCGGGAAAAAACCCCATGCACACATATATACGATATGCGAAATGAAAGTGAAGTGAGCGCA  
GGATAATGGCGACCAGAGCGGGACGGAAGGCCAAAATGAGTGAGAGAGAGAGAGAGCGATCTGGAGTAAGGGTAATGAGT  
GTGCATAATGCAGATGCAGATGCAG**GATCCCGTCCAGGATCCAGG**AGCAGACCAATCCAGCCCATCTCCAGCACTCAT  
TGAACAAGCGGGCTCAATCTGCCATGCCAAGATGCACTTGGGTAGTAGTACACTGGAA

**67. lincRNA.623**

CGAATCTAGTATACCTGTTTAAAGCAATGAAAACGTTTCTACTGCTCCAACGTATATGTACATGCTGCTTGGGCCTAATA  
ATTAACCTTGCTGATAACCCTCATCAAATCA**CCAAACTGCCGTCCACACAATT**CCATGGTGTCCATTATCAAATCCCTG  
TTGGATGTCCGGTGCCTGAATCAACACAATTCAAAGCCCACCCAGAAGTCGAAACCCGTTTTTCGGCACCATCGTTCATT  
CATCATCGCCGCTGGCAGTTGGCAAATTTACACAAGCCAGGTAAACGGATAGACAGAAGGACGGAGCCAGCCAGAGCCG  
AAATACAATTTAAACCCAATCTAAACTCAAATTTTAAATCACAAAAGTTATCAGTTACCTTTTCGGCCAACAGCAGAAGCA  
GCAGCAGTAGCAGCCGCACGTAAACTTTGGTCAAGATCTGTAAGTTTGCAGCTGAATCTTGGTCAAAGATACGGCTACG  
ACTCCCATACACACGCACCTTTGGCAAACACACTCAATTATAGATACAGACAGACAGTGAAGCCACAAACTTCCGTGGA  
AACTTCTCGGGCAGTTTGAATGAAGCGAATCCTGGCCAGACAGACGGGCCGTTTCCCAAGTTTCGATTTCTGGCATT  
GCTGTGCTCGGCAAAATGCATTTGCCATTTCAAACACTAGTTCCAATTGATTAAGTTTCTGGTTAATGGATTGTTTACATAC  
CTAAGCAGGCCGACTCACAGAAGTGAACCTCTGCAACTTTTGGCAATCACCCTAAATGGTAATC

**68. lincRNA.786**

CTGGGAGGCGTCTCACCTTGCCCTTCTGACCTGGGCTTGGCCTGGGCTTGTGGCCAGGGTCTTGGCCCTGGTTTTGCCCT  
GGCCGACTATCAGTGGGTGAGTGTATCATCCGAGCCGCACTGCTGAGCATCAAATGGCCGTTGGCCAATAAAGCCAAAC  
ACTTGGCCAGGGTGTGGGGAAGTCTCGACTGGCGACCAGGTCTCTCTCCGCATCATCTTTTGGGCCGGGCTCTAGATTTCG  
AATGCGCCTGAAGTTGGAGATGGGGCAGATGGAGGTGCTCACGTCACTTTTCTTGTGTTGATAAGGATCCGCAATCGAGAA  
CGAAGACAGGGCGAAGGCGTACGGTCAATATATTGGAATTTTATTATGCATGACAGCTCCAAAAAAGAAGAAACAACA  
ATGGACACGACGCCAACAACAAGGAGCGGCTGGGTCTCCTCATTTTTTCCCTCATTTCTGTTTCGGCTTTGATTATTAT  
TTTGTGTATGGAGAACGATTTCTGAATATCGATAAGGTGCAAAGGCGGAACGGCTGCTTTGTTGTTGGATCGGCATCGGT  
TCTTGTCTGCATGTTTTGTGCATGATTATGTAACATTTTTTCTGTTGCTGAC**CGTCCAAGCGTTCTCTGAAAAG**AAAC  
ATCGATTTATTTTTGACAAATGATTTACCAATGAGTTGACAGTTTTATTTCGGCTTATTTTCCACTTTTTTTTTATGAAA  
CGTTAATAAAGAAACAACGAGGAGGGAACATGTATT

**69. lincRNA.626**

CTTTTACACAATAGTATTGTGTGATTTATTAGTCAGAAGATGGCAATGAGCTTTTCATGGAATCCATATACGGCGAAACA  
AATTTAAAGTTTTGTTTGCACAAAATCTTTAAATTCGGGATTTCTACCTTTTGTAAAACGTACACATATCACTCAGTTTTT  
TCTTATTGAAGTTCAGATTTATTGGTAATGATCGGACGGATGGCCGAATTAACACAGCTTCATGTTTACCATGAAAGTT  
GCCGACTCTATAAAGTATATTTATTTCTGATCGGAATTA**CCAGTTCGATGCCGTCCGTT**AGAAAAGTTAAGGTGAAGAA  
TGTAGATTTTAGTACTGTCAATCCACAGAACGCCAAACCTACCAAAGCGACCACACTTGAAAAAATAATTTGAAATT  
ATGCAATATTTTTTATTGTTTGTGTTGGTCAAGCACTAACAAACAGCAACTGCAAGTTGTCACCTCTCAATTCCTAAAAAT  
CATTTGATATTTTTCTTTTATTATTTTTTACCAATATATAAATAGGTAAAGTTATATCAAGAGAAGTTTTAAATTTCTCC  
CTGCCACTATATGTGTGTTTATATGTATACCTTAGGCCATATGTTTTTTTTTTTTTTTTTTTTTTTCTTATGTACGAATCCAGT  
TCTAAGGCCGATATTATTTTAACTTAATAGTTCAAGTTTAAATAAATTTGAACAATAAGACAAACGAACAATTTTCATA  
TGAAAATATAGTTAAAAGAATGCACTGAATGTTTCGAGACATTTAGTTTGGCACAAACATTTTGCAAATGCGTACAGGA  
TGAAAATTTTTCAGTAAACAAACAGCTTCTAAATCGAGTGACAGTTGAGTAAGATTTAGTACTAGATGAAATGTCTTCA  
ACGTTTTCGAGAGTATACCTATATATATACAACCTTAAAGCCACATCCAAATGACCACAAAGTATCTTGGCCATTATCAA  
ACTGTACCAGCTGCCTGGTAAAATTAAGCCGAAAACTTTTCCATCAATCGCAGACGATCCGAGCACAAGCGACCAGAGAG  
ACAAGTCAATTCATTTCCCTAACAAAAAATCAGTACACCTTTAAAAACTCATATACAAATACATTAGCTTTTTAAATAT  
TTTGATATCGTTTCGAATTAGTTATTTCTATCATTAATTAATAATTTTGCCTTCTTCTTTAGCTGTGTAATGAGTATC  
TGAAAGCCGAGTAGCTTGTAACTGAAAATAATGATGGTTCCGTGCCGATGCTGCGCTGCCTCCGCTGACCGCTGGCTGCT

GCATCCACTGCAGAGACGAAGGATGTGGATAGGGCATAGGCACACATGCATACGCCTACCTGGACACAGGTAGCTCGGCC  
TCCGCAGGTAAGCAAGTCTTTGGCCCGGCAAACACTGCCGCAGATATGTATGTGCGTCCATACAGATTCTCTGCTCGTT  
ACTTGTGCAAACAAGCGCTGAGGACTGAGGAGGGGGGACAGCACCACAGACTCAACCGGCTGCCCTGCCCATGCTGG  
GCACCACCGGCAACATTTAGCAGCGTCATGATCATCAGGGCCAGGCACTGGGCACTAGGGACTCATGACCAAAGCCAGC  
CGGACTGGTTAGGGATTTGGCCGAGATTTGGTGGCGCTGCAGAGGAAAGATGCAACATCGGTCAGCTTCAGGGCTGCA  
GCATCATGGTATAAAAAAGGAGACTAGTTATCAATTCGGGATATATGTTTCGCTGCTTTTGTGTTAATAACAAATAAAA  
TAAATATATCTTAAAAATATTGCTGTTAAAAATTTTTATTAAAGTTTTTACGTACAACAAAAGTCGGTAATTTATTTAA  
TAACCTAAATACTTGCAAAGTAATTTATTTAGCGTTGCTATTCT

**70. CR43314**

CAGGCAAGTCGCAAAGTGAACGCAGCGGCGAACGAGCTAAGAAAGTCAGTTGAAAACAGTGGAAACGCGGTGCCAGTCA  
CTTTTTTTTCATTGCACATAGAGAGAGGGCCCTGTATACTCAGCAGCCTACCACCAACAATCAACCAACCAACCGACCAGC  
CCAACCAACATACCTGTCTGTGGCCACGTTTGTGGCGATCCGATCAGTGCACCGTCAGCCAGCGACGCGCACACACCG  
AACCACACAATCCAGCAGTCTGGGAAACGAACACCCTGTATATACTATCAAGCGAAGTGTAGAGATAAACTGATAATA  
CAACGGAGCCGAGAAAAGAAAAGCACTAACGTGGCGTTAACTCTTTAACTAAAAAACACTCACTCACTCAACCAAAAA  
AAAAAAAACGTCAGTAAAGACAATAAACAAAGTAAAACAAAAACGAGTCAGCGCAAAGTGTCAATAAACTCTCGAAT  
TCATTAACACAACCTAAAACGTTCTATTAGTAAGCACTTGCAAATTTAAACGAAACAAAAAATAATCTTGACAGAGA  
GAGAGAGAGACAGAGAGCGATAAAAAGGAGAGGGAAACATTAGACAGAAATTAGCGTGGCCAACAGTCAAAAGGTCTAATAG  
AAGCGCGTGTATACGAGTCAAAATGCCCGTATACACCTCGTCGAGACCCACAAGCCATGATCGTAAAAACCATCAACA  
AATGTTTCGAAACGAGATAAAAAAACAACAACCGAGAATATATGAAAAATACAGAAAAAAGATACAAAAACCCAGACG  
AGACCGCTGAGACATGTCTTGGCCTGTAAAAGGGCAG// (11079bp) //GCGAAGTGTAGCAGAGCAATTGTCAATTG  
CACCACCCTATAAAGAATGCACAGGAAGAAATCTATATTTTCAAACCTATTTTATACATTAATAATCCAATGAAAGTAA  
AAAATGTATAATGTAATCAAAGTAAAATGTACAGCTAGTTTATATATCAGGTTCCCATACCATCTTAAAATTTTAGTAG  
TTTCGGGACAAAAAATGGGTAATCAACTGTGGCAACCTATTGAGGCAAGTTTTTGTGCTCCTGTTTCTGTCTGTTACA  
TGAGATGCACGTTGTAAGCGGATAGGCTGTGAGGGTTGTTTCAGAAATTCACCTAATAATAATATTGCATTATATATTCAA  
TGTGAAAGCTTTAACTGAAATGATTATCTATGAAACATTTAAAGAGTATTACATTCATATGTGATATACAATTTAAAT  
CAATACTACCAATCTGCCCTCGCTTCGTACCCATTGATACTTATGCCAATTA **CCATTCTCCGTTCCGCTCTTTGCAGAC**  
AAATGCCATGGACTCGCTTACAATTTGGTCTCGTCTTGTCAATCAATTGGGATCGAGTCGGGGTCTAGAAGTGGAAATGG  
CCAAGGATGACCGGCGACCGTTTCTGTTTGGGTTGGCAAGTTGGTAAGTTAATACTCGGACTAGGCTCTAACTTAATTA  
GCCGCACGACAGACTGAAGACTAAAGACTGAATGCCGAAAGCACACGACCCCGACCTCTGGTGACCTCAAAGCTGACGGA  
GGCGACTAATTTATCAAAATGGCTAGAAAACTGAAATAACTCTACGCATAATTAATCCAGCTAAAAACGAAAAATGAG  
TGAAACACCGCGATACTCAAATGCGTTTTTAAACCGTTGCGCAACGCCTATTTCTAACAGTTTTAAATTTTGTGAGACT  
TTTCTTTGGTGTGTTTGTTCGAATTTTTCTTTTGTCTAATTGCCGCTATTAATCC// (5705) //TTCCCTTCTGGCCAA  
GTTCCGCTCGAGCACATTTATGCGGAAGAAGAGGGGTCTTTTTAATGATGACGCTTCCCTGTTGGCCGGCCGCACATATAT  
TTATGAGACACCTTGGCGTTGATAAGTCCCAGACGAAGCTTCAATTGAAATTTGTACTTAATTAAGTCTGGTATGGCGAA  
CCGGCGTTTTCTTTGATCATCGACTAAGAAGGAATTCGAGAATTCGTCAAGTAGCCTACACTTGGGAGCAATTTACTACT  
TAGGCTTAAAAACAATATTTTTTAAACGCGGAAAATAGAATTTACAAATATTT

**71. lincRNA.118**

GTTTTGGTATGCTTTTTATTTGCTTACTTTATAAGATAGTATAGTTTAAATGGAACATACTTTCTTTAGATTTACATTTAAG  
AGAGGTGGGTATCATATTACTTGTAGAGTGTATACTTTGTGGATTCAATTTGTAGTTCGTCACATTCCATTGAACGACT  
TTCGGGCCGCTTCAATTCATTTGCGGCATAGTATTATACAATAACGCAAAATATTTGGTATGCGAGTTAAATATTGAGT  
GCTATTATTGTTCTGTC **CCGCGAAGTCTGCCGTTCCGTTCCAAACCGTCCAAACCGTCCAAACCGTCCAACTGTCCATCTGTC**  
**CATCTGTCCAAAT**TACCAGTTCAAGCTGGTTAAGTTTTTCGGTCACGGACGTTTGGAGCCAGTTTTGGCTAGATTCTAGTA  
**TCCGTTCCGTTCCGAGCGAA**CATAACAGCATCATTTTGCAGCATGGTTGCTGACTTAATGAACTCAACACGAGACGATCG  
ACGATGGAGCTTGAAGATCATCACAGCTCAGTGGTGGTCATATCGGATATCATGGATGTTGGATGTTCCGGTCTTTCAAG  
TGGATCGGATGCGATGTGCGTGCAGCTAATTGATGGGGTGCACATCAATTGAAGTTTGTCACTTTTCAATTTGGGCCAAG  
ACGCGGAATATTTCCAGTCCAAGTCGCTGTCAGCAGATTGGAATTCCTGCCAACTCCGGTTATCTGCGCCAGATGTCA  
CCTGGATGATCTCGTGTCTGGTCTGGACAAAGTGTGCCATCGATAAGGCCGACAAAGTTTAACTGATAAACATGGTCTAC  
ATACATACATACTTACATACTCTTTGGGCTTCAAATGGAGAGCACTCGGCAAAGGATTATATTTCCGGCGATAGTGATTG  
AGATAATGCATGTGCCAAATCTTAACGGACGCACAATAATCCCCGCCATAAGTACGATTTCATTGAGACACCAATTGAGCA  
CTTTCCAAGTAAACCGAAACAGATCGCATAACATTCACGAATAATACGTTTAAAGTATCCCCTTGAATGTATATACAT  
ATATCGGCA
